# Supplementary material for: Pharmacological blockage of transforming growth factor-β signalling by a Traf2- and Nck-interacting kinase inhibitor, NCB-0846
Source: PubMed Central journal article supplement (PMC7782820; doi:10.1038/s41416-020-01162-3), 2020-11-27
Supplement: 41416_2020_1162_MOESM1_ESM.pdf [file 41416_2020_1162_MOESM1_ESM.pdf]

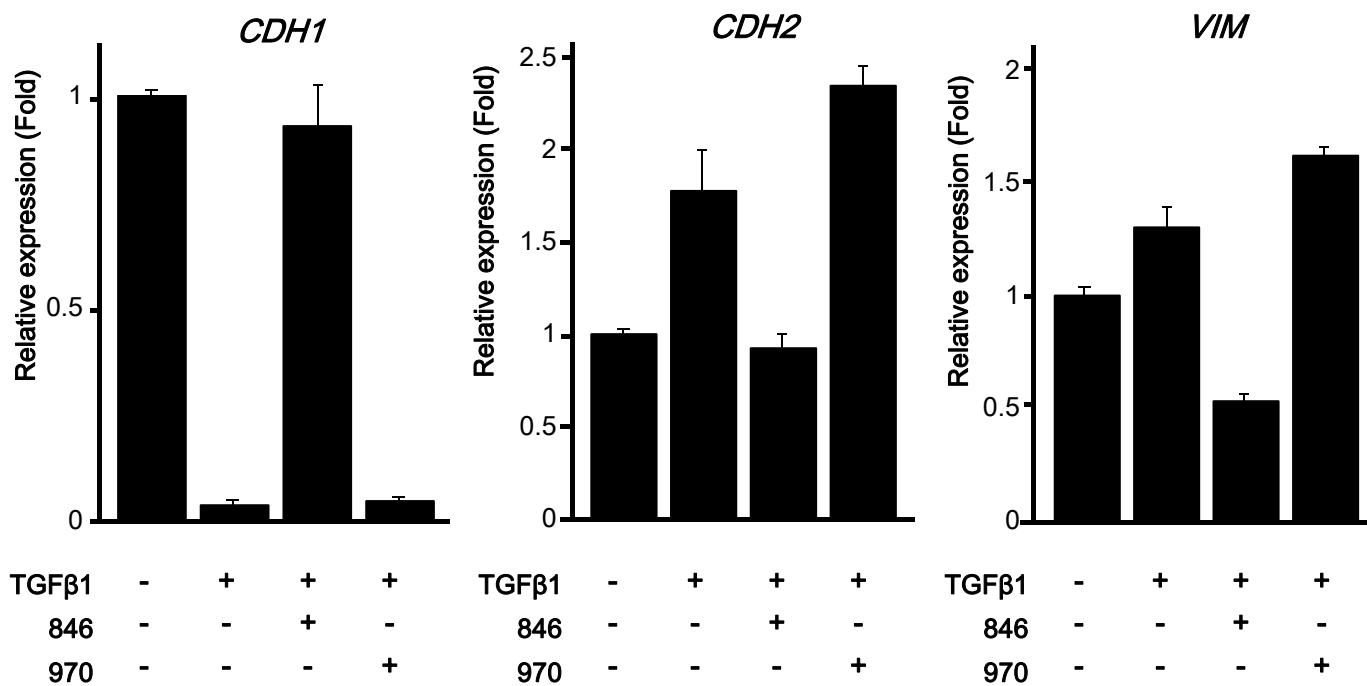

**Supplementary Figure S1. NCB-0846 regulates the expression of EMT-related genes.**

A549 cells were treated with DMSO alone (control), TGFβ1 (5 ng/mL) and DMSO, TGFβ1 and NCB-0846 (3 μM), or TGFβ1 and NCB-0970 (3 μM) for 48 hours, and the relative expression levels of the E-cadherin (*CDH1*), N-cadherin (*CDH2*), and vimentin (*VIM*) genes were quantified (normalized to *ACTB*) in triplicate by qRT-PCR. The mean values for cells treated with DMSO alone are set to one. Error bars represent SD.

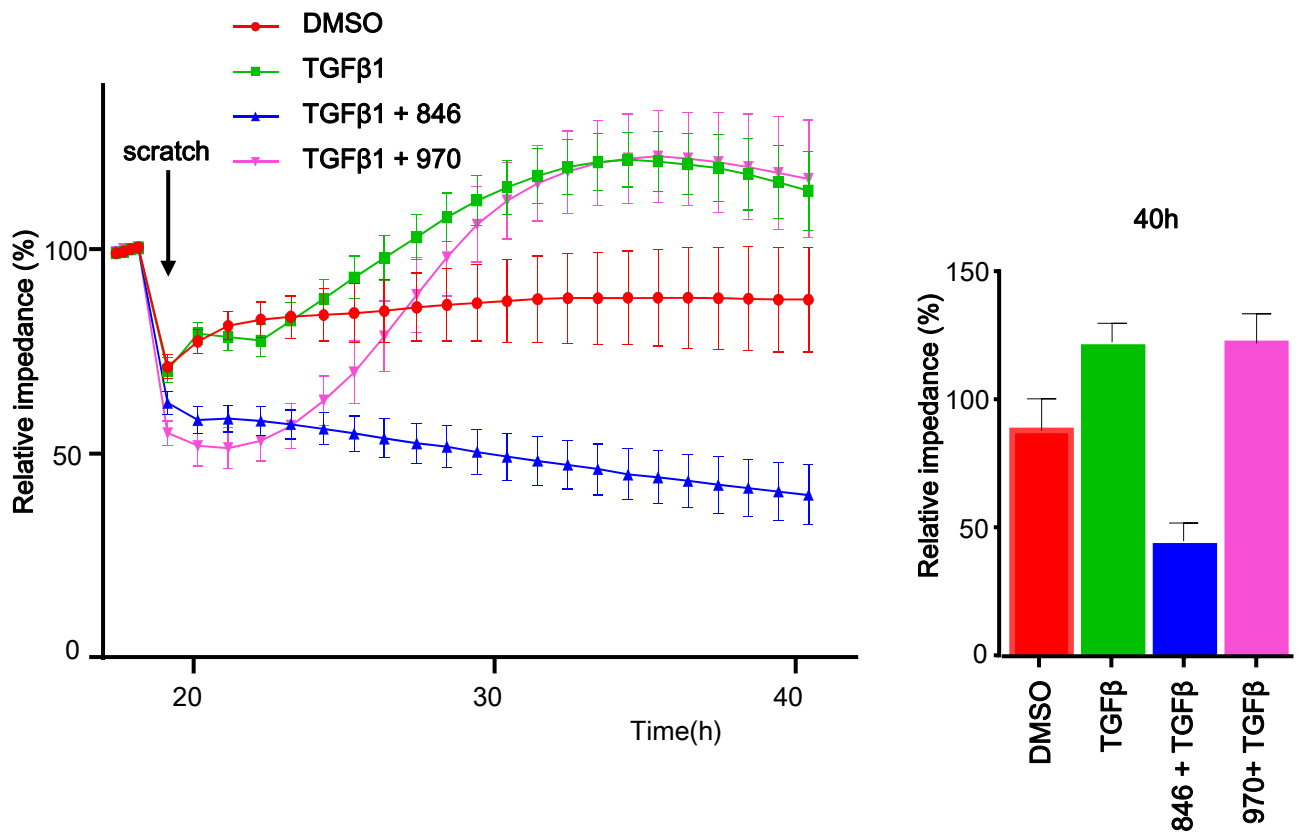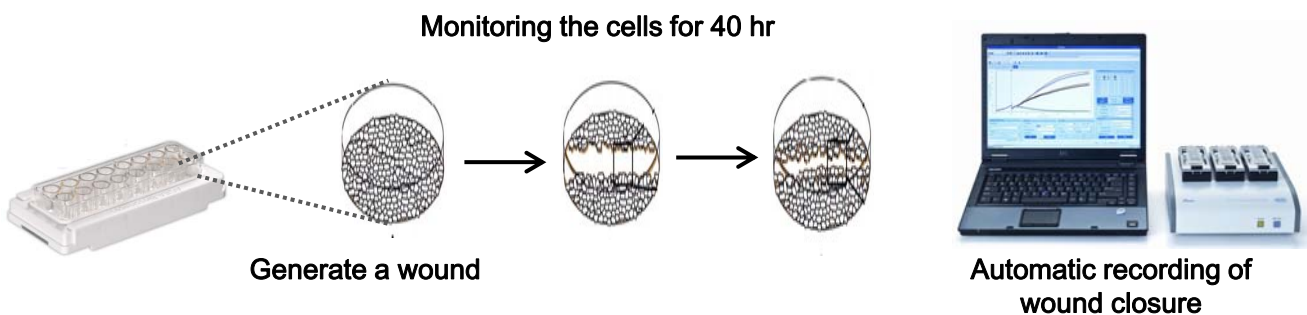

**Supplementary Figure S2. Real-time monitoring of cell migration using the xCELLigence system.**

The migration of A549 cells into denuded wound areas was monitored by measuring the electrical impedance of cell monolayers in the presence of DMSO (control), TGFβ1 (5 ng/mL) and DMSO (vehicle), TGFβ1 and NCB-0846 (3 μM), or TGFβ1 and NCB-0970 (3 μM) for 40 hours. The impedance before scratching is set at 100%. Error bars indicate SD of triplicate experiments.

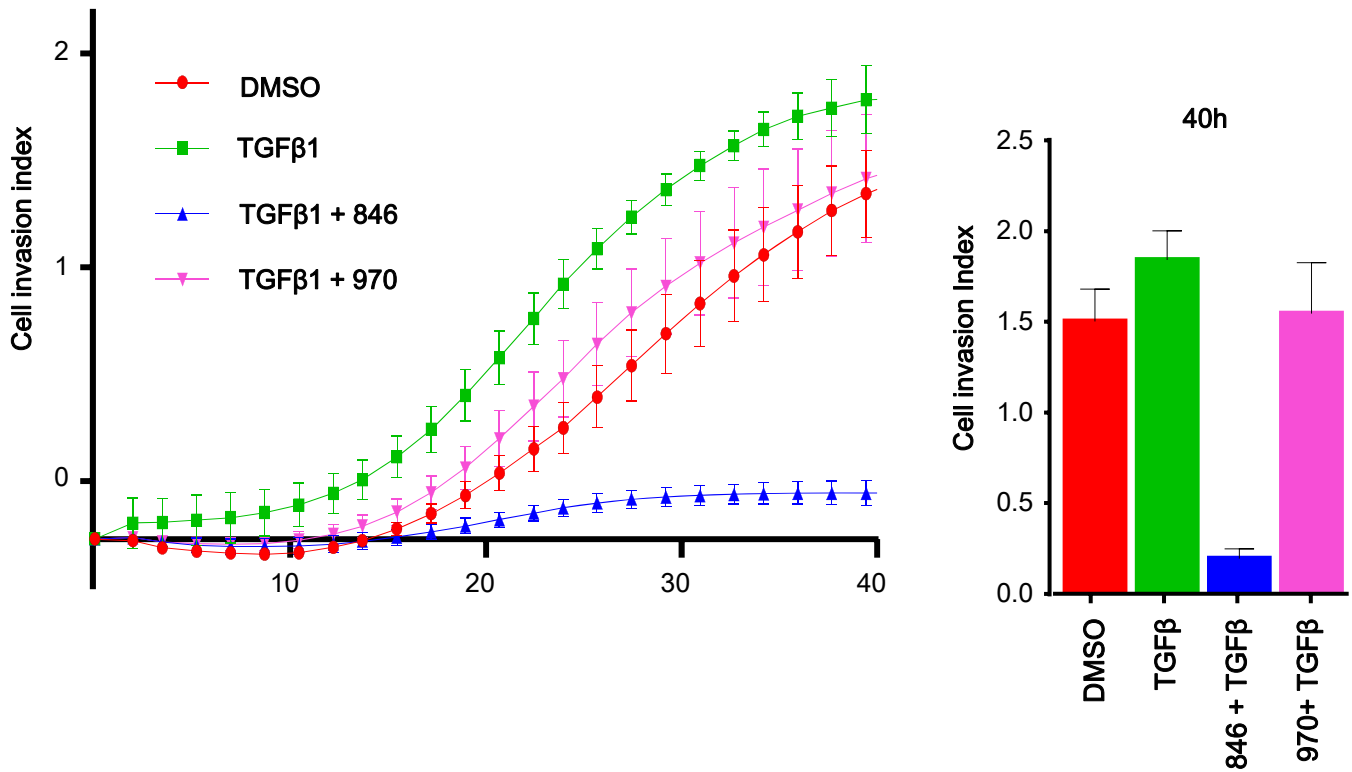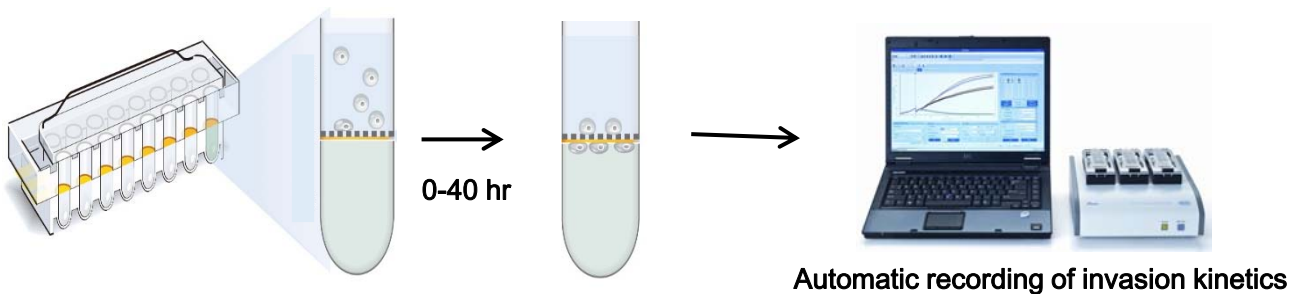

**Supplementary Figure S3. Real-time monitoring of cell invasion using the xCELLigence system.**

A549 cells were seeded onto a Cell Invasion and Migration (CIM)-plate pre-coated with Matrigel in triplicate, and cell invasion was monitored for 40 hours in the presence of DMSO (control), TGFβ1 (5 ng/mL) and DMSO (vehicle), TGFβ1 and NCB-0846 (3 μM), or TGFβ1 and NCB-0970 (3 μM). Error bars indicate SD of triplicate experiments.

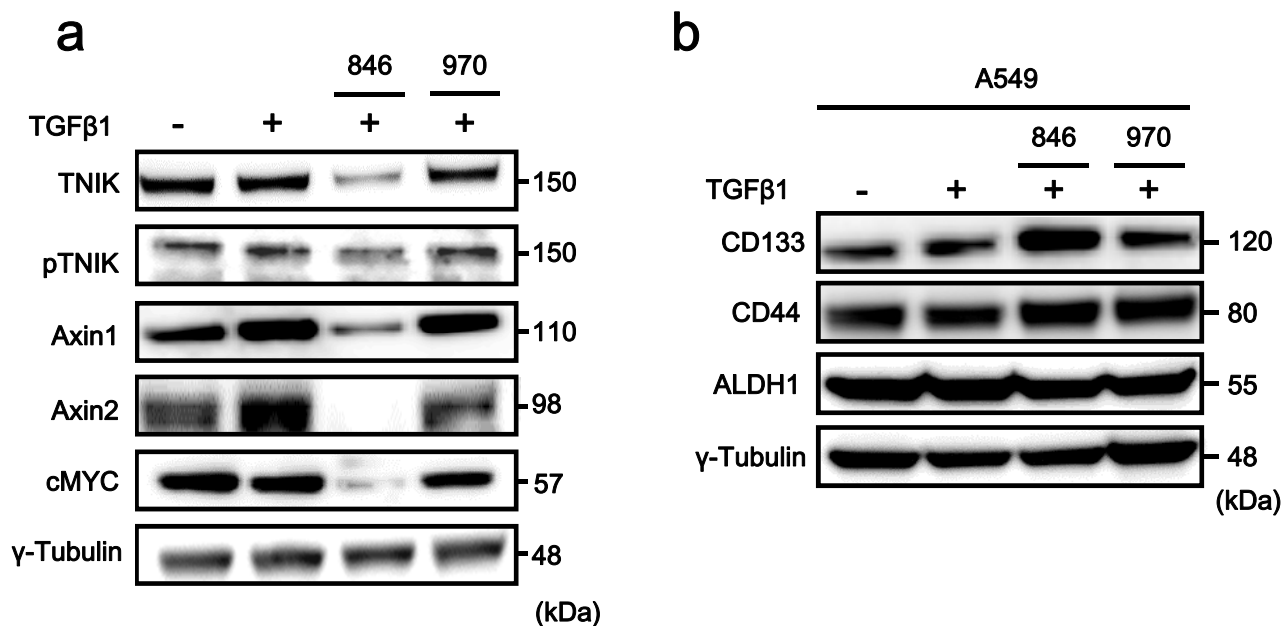

**Supplementary Figure S4. Effects of NCB-0846 on the expression of Wnt signal target gene products and cancer stem cell markers.**

**(a)** Immunoblot analysis of TNIK, TNIK phosphorylated at the 465/467 serine residues (pTNIK), Axin1, Axin2, cMYC, and  $\gamma$ -tubulin (loading control) in A549 cells treated with DMSO alone (control), TGF $\beta$ 1 (5 ng/mL) and DMSO, TGF $\beta$ 1 and NCB-0846 (3  $\mu$ M), or TGF $\beta$ 1 and NCB-0970 (3  $\mu$ M) for 48 hours.

**(b)** Immunoblot analysis of cancer stem cell markers (CD133, CD44, and ALDH1) in A549 cells treated as indicated.

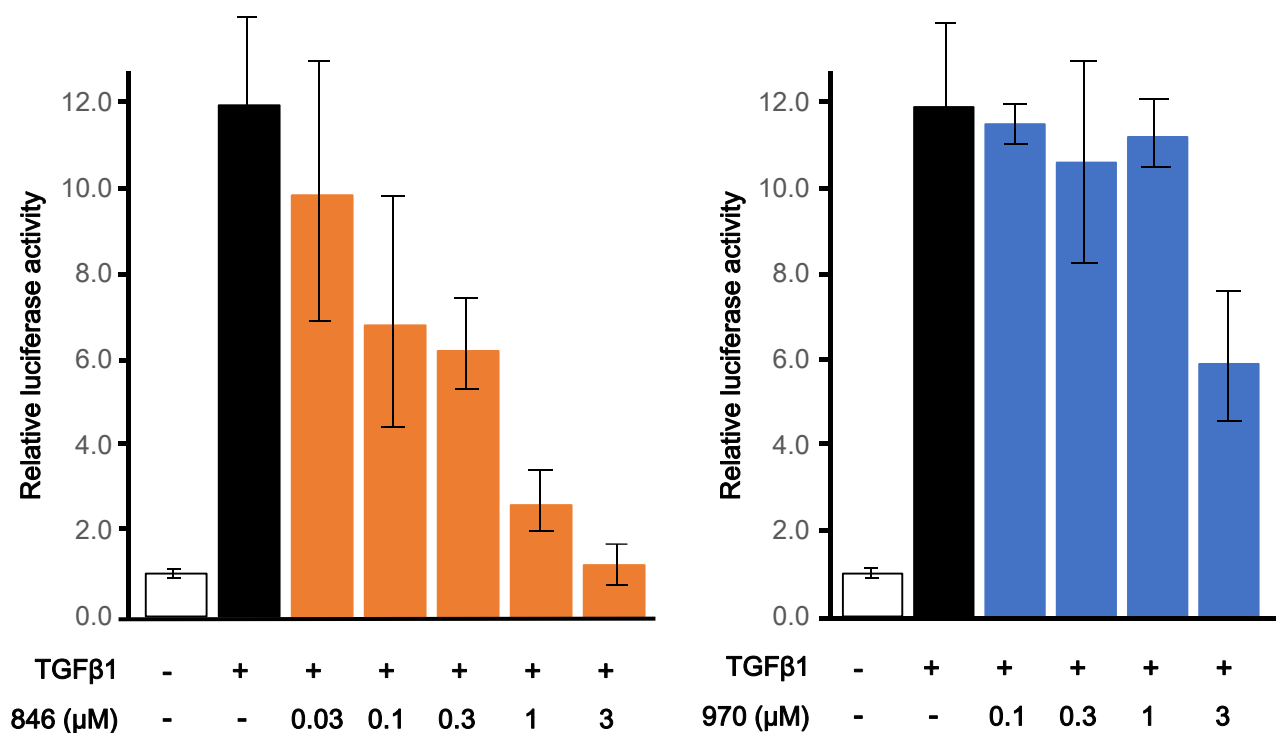

**Supplementary Figure S5. NCB-0846 blocks TGFβ1-induced SMAD transcriptional activity.**

A549 cells transfected with SBE-luciferase reporter plasmid were treated with DMSO (control) or TGF-β1 (2 ng/ml) for 60 minutes and with NCB-0846 or NCB-970 at the indicated concentrations for 5 hours, and their luciferase activities were measured. All the quantitative data are shown as the mean  $\pm$  SD of three independent experiments.

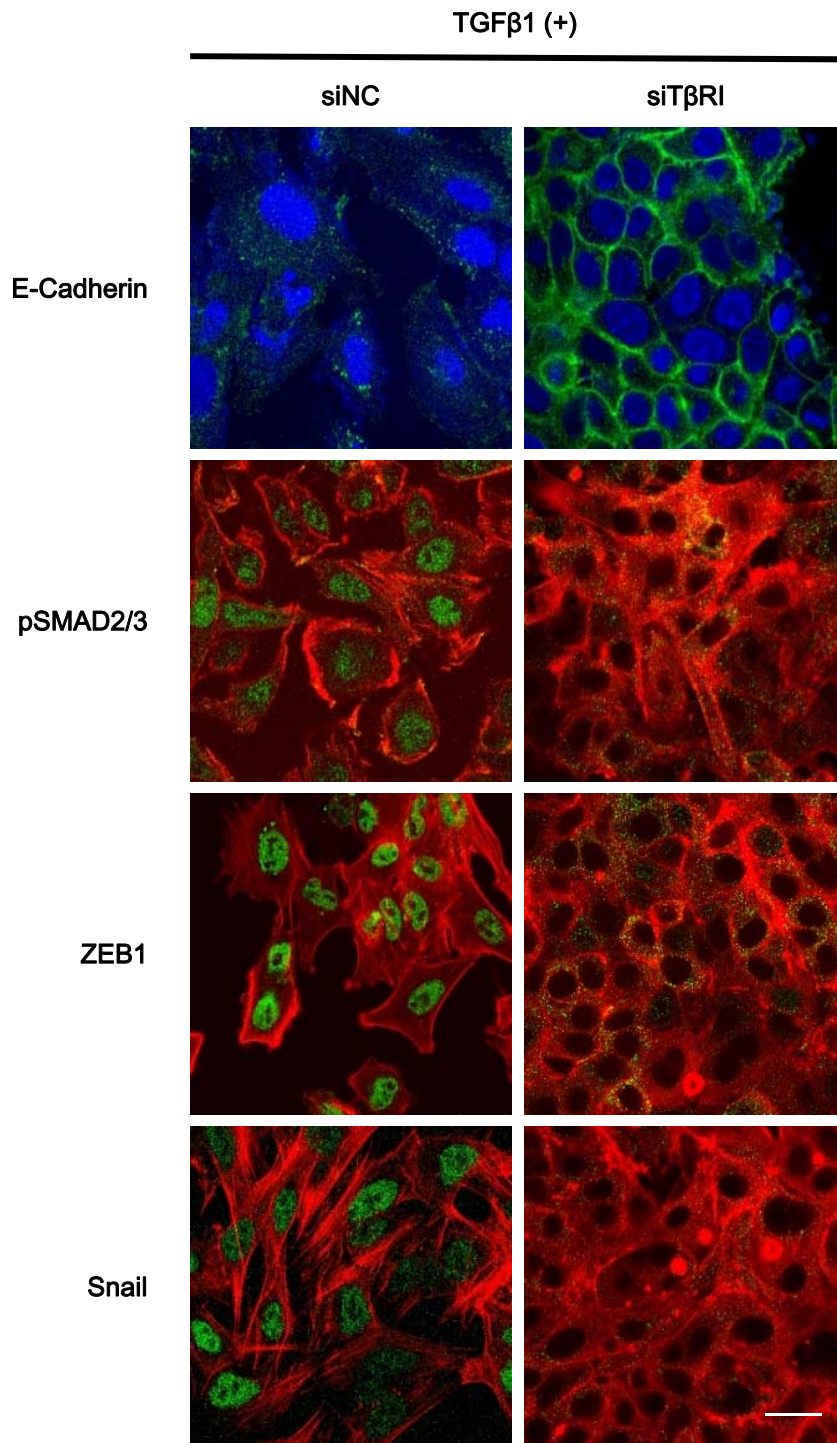

**Supplementary Figure S6. *TGFBR1* knockdown affects the localization of EMT-related proteins.**

Following 12-hour serum starvation, A549 cells were transfected with control siRNA (siNC) or siRNA for *TGFBR1* (siTβRI) and treated with TGFβ1 (5 ng/ml) for 48 hours. The expression and localization of E-cadherin, pSMAD2/3, ZEB1, and Snail were determined by immunofluorescence microscopy (green). The nuclei are stained with TOTO-3 (blue), and filamentous actin is stained with phalloidin (red). Scale bar represents 20 μm.
