# Supplementary material for: Pharmacological blockage of transforming growth factor-β signalling by a Traf2- and Nck-interacting kinase inhibitor, NCB-0846
Source: PubMed Central journal article supplement (PMC7782820; doi:10.1038/s41416-020-01162-3), 2020-11-27
Supplement: 41416_2020_1162_MOESM2_ESM.pdf [file 41416_2020_1162_MOESM2_ESM.pdf]

**Supplementary Table S1. Primary antibodies used in this study.**

| Figure                         | Application     | Antigen     | Species           | Clone             | Resource          | Catalog #                | Dilution    |           |      |
|--------------------------------|-----------------|-------------|-------------------|-------------------|-------------------|--------------------------|-------------|-----------|------|
| <b>Figure 1</b>                | <b>b</b>        | IB          | E-cadherin        | Mouse monoclonal  | 36                | BD Biosciences           | 610182      | 250       |      |
|                                |                 | IB          | Vimentin          | Rabbit monoclonal | D21H3             | CST                      | 5741        | 1000      |      |
|                                |                 | IB          | N-cadherin        | Rabbit monoclonal | D4R1H             | CST                      | 13116       | 1000      |      |
|                                | <b>c</b>        | IB          | $\gamma$ -Tublin  | Mouse monoclonal  | GTU-88            | SIGMA                    | T6557       | 1000      |      |
|                                |                 | IF          | E-cadherin        | Mouse monoclonal  | 36                | BD Biosciences           | 610182      | 50        |      |
|                                |                 | IF          | ZO-1              | Mouse monoclonal  | ZO1-1A12          | Thermo Fisher Scientific | 33-9100     | 100       |      |
| <b>Figure 2</b>                | <b>a</b>        | IF          | Vimentin          | Rabbit monoclonal | D21H3             | CST                      | 5741        | 100       |      |
|                                |                 | IF          | Fibronectin       | Mouse monoclonal  | 10/Fibronectin    | BD Biosciences           | 610077      | 100       |      |
|                                |                 | IB          | pSMAD2            | Rabbit monoclonal | 138D4             | CST                      | 3108        | 500       |      |
|                                |                 | IB          | pSMAD3            | Rabbit monoclonal | C25A9             | CST                      | 9520        | 500       |      |
|                                |                 | IB          | SMAD2/3           | Rabbit monoclonal | D27F4             | CST                      | 8828S       | 500       |      |
|                                |                 | IB          | $\gamma$ -Tublin  | Mouse monoclonal  | GTU-88            | SIGMA                    | T6557       | 1000      |      |
|                                | <b>b</b>        | IF          | pSMAD3            | Rabbit monoclonal | C25A9             | CST                      | 9520        | 100       |      |
|                                |                 | IF          | pSMAD2/3          | Rabbit monoclonal | D27F4             | CST                      | 8828S       | 200       |      |
|                                |                 | IF          | ZEB1              | Rabbit monoclonal | D80D3             | CST                      | 3396        | 200       |      |
|                                | <b>c</b>        | IF          | Snail             | Rabbit monoclonal | C15D3             | CST                      | 3879        | 200       |      |
|                                |                 | IB          | Twist             | Mouse monoclonal  | 2C1a              | Abcam                    | ab50887     | 50        |      |
|                                |                 | IB          | Snail             | Rabbit monoclonal | C15D3             | CST                      | 3879        | 500       |      |
| IB                             |                 | ZEB1        | Rabbit monoclonal | D80D3             | CST               | 3396                     | 1000        |           |      |
| IB                             |                 | Lamin-B1    | Rabbit polyclonal |                   | Abcam             | ab16048                  | 1000        |           |      |
| <b>Figure 3</b>                | <b>a</b>        | IB          | TGF $\beta$ R1    | Rabbit polyclonal | sc-398            | SANTA CRUZ               | lot B2013   | 200       |      |
|                                |                 | IB          | TGF $\beta$ R2    | Rabbit polyclonal | sc-400            | SANTA CRUZ               | lot H1012   | 200       |      |
|                                |                 | IB          | $\gamma$ -Tublin  | Mouse monoclonal  | GTU-88            | SIGMA                    | T6557       | 1000      |      |
|                                | <b>d</b>        | IB          | TGF $\beta$ R1    | Rabbit polyclonal | sc-398            | SANTA CRUZ               | lot B2013   | 200       |      |
|                                |                 | IB          | TGF $\beta$ R2    | Rabbit polyclonal | sc-400            | SANTA CRUZ               | lot H1012   | 200       |      |
|                                |                 | IB          | pSMAD2            | Rabbit monoclonal | 138D4             | CST                      | 3108        | 500       |      |
|                                |                 | IB          | pSMAD3            | Rabbit monoclonal | C25A9             | CST                      | 9520        | 500       |      |
|                                |                 | IB          | E-cadherin        | Mouse monoclonal  | 36                | BD Biosciences           | 610182      | 250       |      |
|                                |                 | IB          | Vimentin          | Rabbit monoclonal | D21H3             | CST                      | 5741        | 1000      |      |
|                                | <b>Figure 4</b> | <b>b, c</b> | IB                | N-cadherin        | Rabbit monoclonal | D4R1H                    | CST         | 13116     | 1000 |
|                                |                 |             | IB                | $\gamma$ -Tublin  | Mouse monoclonal  | GTU-88                   | SIGMA       | T6557     | 1000 |
|                                |                 | <b>b, c</b> | IB                | TGF $\beta$ R1    | Rabbit polyclonal | sc-398                   | SANTA CRUZ  | lot B2013 | 200  |
| <b>Supplementary Figure S4</b> | <b>a</b>        | IB          | TNIK              | Mouse monoclonal  | 53                | BD Biosciences           | 612250      | 2000      |      |
|                                |                 | IB          | pTNIK             | Rabbit monoclonal | #35               | in-house                 |             | 200       |      |
|                                |                 | IB          | Axin1             | Rabbit monoclonal | C95H11            | CST                      | 2074        | 1000      |      |
|                                |                 | IB          | Axin2             | Rabbit monoclonal | 76G6              | CST                      | 2151        | 500       |      |
|                                |                 | IB          | cMyc              | Rabbit monoclonal | D84C12            | cell signaling           | 1472-1      | 1000      |      |
|                                |                 | IB          | $\gamma$ -Tublin  | Mouse monoclonal  | GTU-88            | SIGMA                    | T6557       | 1000      |      |
|                                | <b>b</b>        | IB          | CD133             | Mouse monoclonal  | W6B3C1            | Miltenyi Biotec          | 130-092-395 | 100       |      |
|                                |                 | IB          | CD44              | Mouse monoclonal  | 156-3C11          | Thermo Fisher Scientific | MS668P0     | 250       |      |
|                                |                 | IB          | ALDH1             | Rabbit monoclonal | D4R9V             | cell signaling           | 12035       | 1000      |      |
|                                |                 | IB          | $\gamma$ -Tublin  | Mouse monoclonal  | GTU-88            | SIGMA                    | T6557       | 1000      |      |
| <b>Supplementary Figure S6</b> | IF              | E-cadherin  | Mouse monoclonal  | 36                | BD Biosciences    | 610182                   | 50          |           |      |
|                                | IF              | pSMAD2/3    | Rabbit monoclonal | D27F4             | CST               | 8828S                    | 200         |           |      |
|                                | IF              | ZEB1        | Rabbit monoclonal | D80D3             | CST               | 3396                     | 200         |           |      |
|                                | IF              | Snail       | Rabbit monoclonal | C15D3             | CST               | 3879                     | 200         |           |      |

Abbreviation: IB, immunoblotting; IF, immunofluorescence; BD, Becton & Dickinson; CST, Cell Signaling Technology.

**Supplementary Table S2. Real-time PCR primer and probe sets, miRNA mimics, and miRNA inhibitors used in this study.**

| <b>Figure</b>   |                                | <b>Gene Symbol</b>         | <b>Species</b> | <b>Resource</b>    | <b>Catalog #</b>   |
|-----------------|--------------------------------|----------------------------|----------------|--------------------|--------------------|
| <b>Figure 3</b> | <b>b</b>                       | <i>TGFBR1</i>              | human          | Applied Biosystems | Hs00610320_m1      |
|                 |                                | <i>ACTB</i>                | human          | Applied Biosystems | Hs99999903_m1      |
|                 | <b>c, d</b>                    | siTβR1 ( <i>TGFBR1</i> )   | human          | Applied Biosystems | S14071             |
|                 |                                | siNC (negative control)    | human          | Applied Biosystems | AM4611             |
| <b>Figure 4</b> | <b>a</b>                       | miR-320a                   | human          | Applied Biosystems | 002277             |
|                 |                                | miR-320b                   | human          | Applied Biosystems | 002844             |
|                 |                                | miR-320d                   | human          | Applied Biosystems | 241066             |
|                 |                                | miR-186-5p                 | human          | Applied Biosystems | 002285             |
|                 |                                | U6 snRNA                   | human          | Applied Biosystems | 001973             |
|                 | <b>b</b>                       | miR-320a mimic             | human          | Applied Biosystems | MC11621            |
|                 |                                | miR-320b mimic             | human          | Applied Biosystems | MC13132            |
|                 |                                | miR-320d mimic             | human          | Applied Biosystems | MC13131            |
|                 |                                | miR-186-5p mimic           | human          | Applied Biosystems | MC11753            |
|                 |                                | miR-Ctr (negative control) | human          | Applied Biosystems | 4464058            |
|                 | <b>c</b>                       | miR-320a inhibitor         | human          | Applied Biosystems | MH11621            |
|                 |                                | miR-320b inhibitor         | human          | Applied Biosystems | MH13132            |
|                 |                                | miR-320d inhibitor         | human          | Applied Biosystems | MH13131            |
|                 |                                | miR-186-5p inhibitor       | human          | Applied Biosystems | MH11753            |
|                 |                                | miR-Ctr (negative control) | human          | Applied Biosystems | 4464077            |
|                 | <b>Supplementary Figure S1</b> |                            | <i>CDH1</i>    | human              | Applied Biosystems |
|                 |                                | <i>CDH2</i>                | human          | Applied Biosystems | Hs00983056_m1      |
|                 |                                | <i>VIM</i>                 | human          | Applied Biosystems | Hs00958111_m1      |
|                 |                                | <i>ACTB</i>                | human          | Applied Biosystems | Hs99999903_m1      |

**Supplementary Table S3. miRNA microarray data.**

| <b>Systematic Name</b> | <b>DMSO (Control)</b> | <b>TGFβ1 + DMSO</b> | <b>TGFβ1 + NCB-0846</b> | <b>TGFβ1 + NCB-0970</b> |
|------------------------|-----------------------|---------------------|-------------------------|-------------------------|
| hsa-let-7a-3p          | 0.1                   | 0.1                 | 0.1                     | 0.1                     |
| hsa-let-7a-5p          | 840.274               | 835.795             | 802.223                 | 908.568                 |
| hsa-let-7b-3p          | 0.1                   | 0.1                 | 0.1                     | 0.1                     |
| hsa-let-7b-5p          | 274.805               | 253.127             | 275.279                 | 258.323                 |
| hsa-let-7c-3p          | 0.1                   | 0.1                 | 0.1                     | 0.1                     |
| hsa-let-7c-5p          | 148.225               | 132.295             | 151.678                 | 137.077                 |
| hsa-let-7d-3p          | 0.1                   | 0.1                 | 0.1                     | 0.1                     |
| hsa-let-7d-5p          | 64.4341               | 61.8796             | 57.1928                 | 66.2934                 |
| hsa-let-7e-3p          | 0.1                   | 0.1                 | 0.1                     | 0.1                     |
| hsa-let-7e-5p          | 157.354               | 222.668             | 172.245                 | 268.667                 |
| hsa-let-7f-1-3p        | 0.1                   | 0.1                 | 0.1                     | 0.1                     |
| hsa-let-7f-2-3p        | 0.1                   | 0.1                 | 0.1                     | 0.1                     |
| hsa-let-7f-5p          | 698.544               | 692.16              | 645.401                 | 756.955                 |
| hsa-let-7g-3p          | 0.1                   | 0.1                 | 0.1                     | 0.1                     |
| hsa-let-7g-5p          | 163.07                | 157.289             | 133.835                 | 179.799                 |
| hsa-let-7i-3p          | 0.1                   | 0.1                 | 0.1                     | 0.1                     |
| hsa-let-7i-5p          | 472.961               | 522.9               | 444.36                  | 590.277                 |
| hsa-miR-100-3p         | 0.1                   | 0.1                 | 0.1                     | 0.1                     |
| hsa-miR-100-5p         | 107.448               | 191.276             | 105.525                 | 250.087                 |
| hsa-miR-101-3p         | 10.1981               | 11.1553             | 2.4956                  | 14.9508                 |
| hsa-miR-101-5p         | 0.1                   | 0.1                 | 0.1                     | 0.1                     |
| hsa-miR-103a-2-5p      | 0.1                   | 0.1                 | 0.1                     | 0.1                     |
| hsa-miR-103a-3p        | 136.754               | 125.829             | 111.085                 | 180.334                 |
| hsa-miR-103b           | 0.1                   | 0.1                 | 0.1                     | 0.1                     |
| hsa-miR-105-3p         | 0.1                   | 0.1                 | 0.1                     | 0.1                     |
| hsa-miR-105-5p         | 0.1                   | 0.1                 | 0.1                     | 0.1                     |
| hsa-miR-106a-3p        | 0.1                   | 0.1                 | 0.1                     | 0.1                     |
| hsa-miR-106b-3p        | 0.1                   | 0.1                 | 0.1                     | 0.1                     |
| hsa-miR-106b-5p        | 102.111               | 96.0757             | 76.8515                 | 134.696                 |
| hsa-miR-107            | 146.083               | 133.784             | 139.001                 | 187.576                 |
| hsa-miR-10a-3p         | 0.1                   | 0.1                 | 0.1                     | 0.1                     |
| hsa-miR-10a-5p         | 25.1412               | 19.19               | 19.7574                 | 17.5567                 |
| hsa-miR-10b-3p         | 0.1                   | 0.1                 | 0.1                     | 0.1                     |
| hsa-miR-10b-5p         | 8.99454               | 7.64448             | 6.81585                 | 7.02133                 |
| hsa-miR-1178-3p        | 0.1                   | 0.1                 | 0.1                     | 0.1                     |
| hsa-miR-1178-5p        | 0.1                   | 0.1                 | 0.1                     | 0.1                     |
| hsa-miR-1179           | 0.1                   | 0.1                 | 0.1                     | 0.1                     |
| hsa-miR-1180-3p        | 0.1                   | 0.1                 | 0.1                     | 0.1                     |
| hsa-miR-1180-5p        | 0.1                   | 0.1                 | 0.1                     | 0.1                     |
| hsa-miR-1181           | 4.08338               | 3.64703             | 7.04148                 | 0.1                     |
| hsa-miR-1182           | 0.1                   | 0.1                 | 0.1                     | 0.1                     |
| hsa-miR-1183           | 0.1                   | 0.1                 | 0.1                     | 0.1                     |
| hsa-miR-1184           | 0.1                   | 0.1                 | 0.1                     | 0.1                     |
| hsa-miR-1185-1-3p      | 1.59198               | 0.1                 | 2.05331                 | 0.1                     |
| hsa-miR-1185-2-3p      | 0.1                   | 0.1                 | 0.1                     | 0.1                     |
| hsa-miR-1185-5p        | 0.1                   | 0.1                 | 0.1                     | 0.1                     |
| hsa-miR-1193           | 0.1                   | 0.1                 | 0.1                     | 0.1                     |
| hsa-miR-1197           | 0.1                   | 0.1                 | 0.1                     | 0.1                     |
| hsa-miR-1199-3p        | 0.1                   | 0.1                 | 0.1                     | 0.1                     |
| hsa-miR-1199-5p        | 0.1                   | 0.1                 | 0.1                     | 0.1                     |

|                  |         |         |         |         |
|------------------|---------|---------|---------|---------|
| hsa-miR-1200     | 0.1     | 0.1     | 0.1     | 0.1     |
| hsa-miR-1202     | 20.54   | 27.0059 | 36.3362 | 29.6413 |
| hsa-miR-1203     | 0.1     | 0.1     | 0.1     | 0.1     |
| hsa-miR-1204     | 0.1     | 0.1     | 0.1     | 0.1     |
| hsa-miR-1205     | 0.1     | 0.1     | 0.1     | 0.1     |
| hsa-miR-1206     | 0.1     | 0.1     | 0.1     | 0.1     |
| hsa-miR-1207-3p  | 0.1     | 2.23204 | 0.1     | 2.15523 |
| hsa-miR-1207-5p  | 45.7403 | 37.7841 | 55.4974 | 28.318  |
| hsa-miR-1208     | 0.1     | 0.1     | 0.1     | 0.1     |
| hsa-miR-122-3p   | 0.1     | 0.1     | 0.1     | 0.1     |
| hsa-miR-1224-3p  | 0.1     | 0.1     | 0.1     | 0.1     |
| hsa-miR-1224-5p  | 0.1     | 0.1     | 2.11655 | 0.1     |
| hsa-miR-1225-5p  | 43.2725 | 35.7447 | 52.5087 | 28.3145 |
| hsa-miR-122-5p   | 0.1     | 0.1     | 0.1     | 0.1     |
| hsa-miR-1226-3p  | 0.1     | 0.1     | 0.1     | 0.1     |
| hsa-miR-1226-5p  | 0.1     | 0.1     | 0.1     | 0.1     |
| hsa-miR-1227-3p  | 0.1     | 0.1     | 0.1     | 0.1     |
| hsa-miR-1227-5p  | 6.04207 | 5.93852 | 7.76467 | 2.39279 |
| hsa-miR-1228-3p  | 0.1     | 0.1     | 0.1     | 0.1     |
| hsa-miR-1228-5p  | 0.1     | 0.1     | 0.1     | 0.1     |
| hsa-miR-1229-3p  | 0.1     | 0.1     | 0.1     | 0.1     |
| hsa-miR-1229-5p  | 5.90695 | 6.24197 | 7.97529 | 3.52077 |
| hsa-miR-1231     | 0.1     | 0.1     | 0.1     | 0.1     |
| hsa-miR-1233-3p  | 0.1     | 0.1     | 0.1     | 0.1     |
| hsa-miR-1233-5p  | 0.1     | 0.1     | 0.1     | 0.1     |
| hsa-miR-1234-3p  | 0.1     | 0.1     | 0.1     | 0.1     |
| hsa-miR-1236-3p  | 0.1     | 0.1     | 0.1     | 0.1     |
| hsa-miR-1236-5p  | 0.1     | 0.1     | 0.1     | 0.1     |
| hsa-miR-1237-3p  | 0.1     | 0.1     | 0.1     | 0.1     |
| hsa-miR-1237-5p  | 0.1     | 0.1     | 0.1     | 0.1     |
| hsa-miR-1238-3p  | 0.1     | 0.1     | 0.1     | 0.1     |
| hsa-miR-1238-5p  | 0.1     | 0.1     | 0.1     | 0.1     |
| hsa-miR-1243     | 0.1     | 0.1     | 0.1     | 0.1     |
| hsa-miR-124-3p   | 0.1     | 0.1     | 0.1     | 0.1     |
| hsa-miR-1244     | 0.1     | 0.1     | 0.1     | 0.1     |
| hsa-miR-1245a    | 0.1     | 0.1     | 0.1     | 0.1     |
| hsa-miR-1245b-3p | 0.1     | 0.1     | 0.1     | 0.1     |
| hsa-miR-1245b-5p | 0.1     | 0.1     | 0.1     | 0.1     |
| hsa-miR-124-5p   | 0.1     | 0.1     | 0.1     | 0.1     |
| hsa-miR-1246     | 12.9665 | 47.5727 | 130.001 | 33.4813 |
| hsa-miR-1247-3p  | 0.1     | 0.1     | 0.1     | 0.1     |
| hsa-miR-1247-5p  | 0.1     | 0.1     | 0.1     | 0.1     |
| hsa-miR-1248     | 0.1     | 0.1     | 0.1     | 0.1     |
| hsa-miR-1249-3p  | 0.1     | 0.1     | 0.1     | 0.1     |
| hsa-miR-1249-5p  | 2.45674 | 2.26772 | 2.31613 | 1.64706 |
| hsa-miR-1250-3p  | 0.1     | 0.1     | 0.1     | 0.1     |
| hsa-miR-1250-5p  | 0.1     | 0.1     | 0.1     | 0.1     |
| hsa-miR-1251-3p  | 0.1     | 0.1     | 0.1     | 0.1     |
| hsa-miR-1251-5p  | 0.1     | 0.1     | 0.1     | 0.1     |
| hsa-miR-1252-3p  | 0.1     | 0.1     | 0.1     | 0.1     |
| hsa-miR-1252-5p  | 0.1     | 0.1     | 0.1     | 0.1     |
| hsa-miR-1253     | 0.1     | 0.1     | 0.1     | 0.1     |
| hsa-miR-1254     | 0.1     | 0.1     | 0.1     | 0.1     |

|                    |         |         |         |         |
|--------------------|---------|---------|---------|---------|
| hsa-miR-1255a      | 0.1     | 0.1     | 0.1     | 0.1     |
| hsa-miR-1255b-2-3p | 0.1     | 0.1     | 0.1     | 0.1     |
| hsa-miR-1255b-5p   | 0.1     | 0.1     | 0.1     | 0.1     |
| hsa-miR-1256       | 0.1     | 0.1     | 0.1     | 0.1     |
| hsa-miR-1257       | 0.1     | 0.1     | 0.1     | 0.1     |
| hsa-miR-1258       | 0.1     | 0.1     | 0.1     | 0.1     |
| hsa-miR-125a-3p    | 5.4593  | 6.06916 | 3.71725 | 4.97975 |
| hsa-miR-125a-5p    | 54.8335 | 77.9028 | 19.4877 | 86.4494 |
| hsa-miR-125b-1-3p  | 0.1     | 0.1     | 0.1     | 0.1     |
| hsa-miR-125b-2-3p  | 0.1     | 0.1     | 0.1     | 0.1     |
| hsa-miR-125b-5p    | 89.3087 | 155.108 | 77.2147 | 181.402 |
| hsa-miR-1260a      | 89.4479 | 241.867 | 125.303 | 330.356 |
| hsa-miR-1260b      | 116.006 | 264.886 | 150.387 | 381.086 |
| hsa-miR-1261       | 0.1     | 0.1     | 0.1     | 0.1     |
| hsa-miR-1262       | 0.1     | 0.1     | 0.1     | 0.1     |
| hsa-miR-1263       | 0.1     | 0.1     | 0.1     | 0.1     |
| hsa-miR-126-3p     | 8.51213 | 7.84399 | 6.36112 | 8.36438 |
| hsa-miR-1264       | 0.1     | 0.1     | 0.1     | 0.1     |
| hsa-miR-1265       | 0.1     | 0.1     | 0.1     | 0.1     |
| hsa-miR-126-5p     | 0.1     | 0.1     | 0.1     | 0.1     |
| hsa-miR-1266-3p    | 0.1     | 0.1     | 0.1     | 0.1     |
| hsa-miR-1266-5p    | 0.1     | 0.1     | 0.1     | 0.1     |
| hsa-miR-1267       | 0.1     | 0.1     | 0.1     | 0.1     |
| hsa-miR-1268a      | 6.91557 | 11.1827 | 51.7512 | 7.88996 |
| hsa-miR-1268b      | 0.1     | 0.1     | 0.1     | 0.1     |
| hsa-miR-1269a      | 0.1     | 0.1     | 0.1     | 0.1     |
| hsa-miR-1269b      | 0.1     | 0.1     | 0.1     | 0.1     |
| hsa-miR-1270       | 0.1     | 0.1     | 0.1     | 0.1     |
| hsa-miR-1271-3p    | 0.1     | 0.1     | 0.1     | 0.1     |
| hsa-miR-1271-5p    | 0.1     | 0.1     | 0.1     | 0.1     |
| hsa-miR-1272       | 0.1     | 0.1     | 0.1     | 0.1     |
| hsa-miR-1273a      | 0.1     | 0.1     | 0.1     | 0.1     |
| hsa-miR-1273c      | 0.1     | 0.1     | 0.1     | 0.1     |
| hsa-miR-1273d      | 0.1     | 0.1     | 0.1     | 0.1     |
| hsa-miR-1273e      | 0.1     | 0.1     | 0.1     | 0.1     |
| hsa-miR-1273f      | 0.1     | 0.1     | 3.72478 | 0.1     |
| hsa-miR-1273g-3p   | 698.203 | 765.186 | 1292.65 | 1003.48 |
| hsa-miR-1273g-5p   | 0.1     | 0.1     | 0.1     | 0.1     |
| hsa-miR-1273h-3p   | 0.1     | 0.1     | 0.1     | 0.1     |
| hsa-miR-1273h-5p   | 0.1     | 0.1     | 0.1     | 0.1     |
| hsa-miR-127-3p     | 0.1     | 0.1     | 0.1     | 0.1     |
| hsa-miR-1275       | 12.3334 | 12.133  | 10.8777 | 8.37309 |
| hsa-miR-127-5p     | 0.1     | 0.1     | 0.1     | 0.1     |
| hsa-miR-1276       | 0.1     | 0.1     | 0.1     | 0.1     |
| hsa-miR-1277-3p    | 0.1     | 0.1     | 0.1     | 0.1     |
| hsa-miR-1278       | 0.1     | 0.1     | 0.1     | 0.1     |
| hsa-miR-1279       | 0.1     | 0.1     | 0.1     | 0.1     |
| hsa-miR-1281       | 0.1     | 0.1     | 0.1     | 0.1     |
| hsa-miR-128-1-5p   | 0.1     | 0.1     | 0.1     | 0.1     |
| hsa-miR-1282       | 0.1     | 0.1     | 0.1     | 0.1     |
| hsa-miR-128-2-5p   | 0.1     | 0.1     | 0.1     | 0.1     |
| hsa-miR-1283       | 0.1     | 0.1     | 0.1     | 0.1     |
| hsa-miR-128-3p     | 11.0671 | 8.20704 | 8.69734 | 10.4719 |

|                  |         |         |         |         |
|------------------|---------|---------|---------|---------|
| hsa-miR-1284     | 0.1     | 0.1     | 0.1     | 0.1     |
| hsa-miR-1285-3p  | 0.1     | 0.1     | 0.1     | 0.1     |
| hsa-miR-1285-5p  | 0.1     | 0.1     | 0.1     | 0.1     |
| hsa-miR-1286     | 0.1     | 0.1     | 0.1     | 0.1     |
| hsa-miR-1287-3p  | 0.1     | 0.1     | 0.1     | 0.1     |
| hsa-miR-1287-5p  | 0.1     | 0.1     | 6.32102 | 1.69999 |
| hsa-miR-1288-3p  | 1.5505  | 0.1     | 0.1     | 1.76478 |
| hsa-miR-1288-5p  | 0.1     | 0.1     | 0.1     | 0.1     |
| hsa-miR-1289     | 0.1     | 0.1     | 0.1     | 0.1     |
| hsa-miR-1290     | 2.17096 | 6.00376 | 28.0232 | 5.86481 |
| hsa-miR-1291     | 0.1     | 0.1     | 0.1     | 0.1     |
| hsa-miR-129-1-3p | 0.1     | 0.1     | 0.1     | 1.8685  |
| hsa-miR-1292-3p  | 0.1     | 0.1     | 0.1     | 0.1     |
| hsa-miR-129-2-3p | 0.1     | 0.1     | 0.1     | 1.67454 |
| hsa-miR-1292-5p  | 0.1     | 0.1     | 0.1     | 0.1     |
| hsa-miR-1293     | 0.1     | 0.1     | 0.1     | 0.1     |
| hsa-miR-1294     | 0.1     | 0.1     | 0.1     | 0.1     |
| hsa-miR-1295a    | 0.1     | 0.1     | 0.1     | 0.1     |
| hsa-miR-1295b-3p | 0.1     | 0.1     | 0.1     | 0.1     |
| hsa-miR-1295b-5p | 0.1     | 0.1     | 0.1     | 0.1     |
| hsa-miR-129-5p   | 0.1     | 0.1     | 0.1     | 0.1     |
| hsa-miR-1296-3p  | 0.1     | 0.1     | 0.1     | 0.1     |
| hsa-miR-1296-5p  | 0.1     | 0.1     | 0.1     | 0.1     |
| hsa-miR-1297     | 0.1     | 0.1     | 0.1     | 0.1     |
| hsa-miR-1298-3p  | 0.1     | 0.1     | 0.1     | 0.1     |
| hsa-miR-1298-5p  | 0.1     | 0.1     | 0.1     | 0.1     |
| hsa-miR-1299     | 0.1     | 0.1     | 0.1     | 0.1     |
| hsa-miR-1301-3p  | 0.1     | 0.1     | 0.1     | 0.1     |
| hsa-miR-1301-5p  | 0.1     | 0.1     | 0.1     | 0.1     |
| hsa-miR-1302     | 0.1     | 0.1     | 0.1     | 0.1     |
| hsa-miR-1303     | 0.1     | 0.1     | 0.1     | 0.1     |
| hsa-miR-1304-3p  | 0.1     | 0.1     | 0.1     | 0.1     |
| hsa-miR-1304-5p  | 0.1     | 0.1     | 0.1     | 0.1     |
| hsa-miR-1305     | 9.63932 | 9.25758 | 9.18199 | 11.0083 |
| hsa-miR-1306-3p  | 0.1     | 0.1     | 0.1     | 0.1     |
| hsa-miR-1306-5p  | 0.1     | 0.1     | 0.1     | 0.1     |
| hsa-miR-1307-3p  | 0.1     | 0.1     | 0.1     | 0.1     |
| hsa-miR-1307-5p  | 0.1     | 0.1     | 0.1     | 0.1     |
| hsa-miR-130a-3p  | 116.018 | 125.131 | 105.44  | 132.997 |
| hsa-miR-130a-5p  | 0.1     | 0.1     | 0.1     | 0.1     |
| hsa-miR-130b-3p  | 10.6947 | 15.5106 | 7.98623 | 16.7573 |
| hsa-miR-130b-5p  | 0.1     | 0.1     | 0.1     | 0.1     |
| hsa-miR-1321     | 0.1     | 0.1     | 0.1     | 0.1     |
| hsa-miR-1322     | 0.1     | 0.1     | 0.1     | 0.1     |
| hsa-miR-1323     | 0.1     | 0.1     | 0.1     | 0.1     |
| hsa-miR-132-3p   | 0.1     | 0.1     | 12.5157 | 2.13265 |
| hsa-miR-1324     | 0.1     | 0.1     | 0.1     | 0.1     |
| hsa-miR-132-5p   | 0.1     | 0.1     | 0.1     | 0.1     |
| hsa-miR-133a-3p  | 0.1     | 0.1     | 0.1     | 0.1     |
| hsa-miR-133a-5p  | 0.1     | 0.1     | 0.1     | 0.1     |
| hsa-miR-133b     | 0.1     | 0.1     | 0.1     | 0.1     |
| hsa-miR-1343-3p  | 0.1     | 0.1     | 0.1     | 0.1     |
| hsa-miR-1343-5p  | 0.1     | 0.1     | 0.1     | 0.1     |

|                  |         |         |         |          |
|------------------|---------|---------|---------|----------|
| hsa-miR-134-3p   | 0.1     | 0.1     | 0.1     | 0.1      |
| hsa-miR-134-5p   | 10.7655 | 8.50413 | 14.7789 | 5.74026  |
| hsa-miR-135a-3p  | 0.1     | 0.1     | 0.1     | 0.1      |
| hsa-miR-135a-5p  | 0.1     | 0.1     | 0.1     | 0.1      |
| hsa-miR-135b-3p  | 0.1     | 0.1     | 0.1     | 0.1      |
| hsa-miR-135b-5p  | 0.1     | 4.5114  | 0.1     | 4.62761  |
| hsa-miR-136-3p   | 0.1     | 0.1     | 0.1     | 0.1      |
| hsa-miR-136-5p   | 0.1     | 0.1     | 0.1     | 0.1      |
| hsa-miR-137      | 3.39783 | 5.78683 | 0.1     | 8.91231  |
| hsa-miR-138-1-3p | 0.1     | 0.1     | 0.1     | 0.1      |
| hsa-miR-138-2-3p | 0.1     | 0.1     | 0.1     | 0.1      |
| hsa-miR-138-5p   | 5.69316 | 2.37111 | 10.9933 | 3.15206  |
| hsa-miR-139-3p   | 0.1     | 0.1     | 0.1     | 0.1      |
| hsa-miR-139-5p   | 0.1     | 0.1     | 0.1     | 0.1      |
| hsa-miR-1-3p     | 0.1     | 0.1     | 0.1     | 0.1      |
| hsa-miR-140-3p   | 10.1487 | 8.19456 | 8.47767 | 8.31451  |
| hsa-miR-140-5p   | 10.9719 | 9.21798 | 6.25013 | 9.68916  |
| hsa-miR-141-3p   | 0.1     | 0.1     | 0.1     | 0.1      |
| hsa-miR-141-5p   | 0.1     | 0.1     | 0.1     | 0.1      |
| hsa-miR-142-3p   | 0.1     | 0.1     | 0.1     | 0.1      |
| hsa-miR-142-5p   | 0.1     | 0.1     | 0.1     | 0.1      |
| hsa-miR-143-3p   | 0.1     | 0.1     | 0.1     | 0.1      |
| hsa-miR-143-5p   | 0.1     | 0.1     | 0.1     | 0.1      |
| hsa-miR-144-3p   | 0.1     | 0.1     | 0.1     | 0.1      |
| hsa-miR-144-5p   | 0.1     | 0.1     | 0.1     | 0.1      |
| hsa-miR-145-3p   | 0.1     | 0.1     | 0.1     | 0.1      |
| hsa-miR-145-5p   | 0.1     | 0.1     | 0.1     | 0.1      |
| hsa-miR-1468-3p  | 0.1     | 0.1     | 0.1     | 0.1      |
| hsa-miR-1468-5p  | 0.1     | 0.1     | 0.1     | 0.1      |
| hsa-miR-1469     | 0.1     | 0.1     | 0.1     | 0.1      |
| hsa-miR-146a-3p  | 0.1     | 0.1     | 0.1     | 0.1      |
| hsa-miR-146a-5p  | 0.1     | 0.1     | 0.1     | 0.1      |
| hsa-miR-146b-3p  | 0.1     | 0.1     | 0.1     | 0.1      |
| hsa-miR-146b-5p  | 0.1     | 0.1     | 0.1     | 0.1      |
| hsa-miR-1470     | 0.1     | 0.1     | 0.1     | 0.1      |
| hsa-miR-1471     | 0.1     | 0.1     | 0.1     | 0.1      |
| hsa-miR-147a     | 0.1     | 0.1     | 0.1     | 0.1      |
| hsa-miR-147b     | 0.1     | 0.1     | 0.1     | 0.1      |
| hsa-miR-148a-3p  | 5.67374 | 0.1     | 0.1     | 0.1      |
| hsa-miR-148a-5p  | 0.1     | 0.1     | 0.1     | 0.1      |
| hsa-miR-148b-3p  | 10.2598 | 7.32114 | 5.69306 | 11.435   |
| hsa-miR-148b-5p  | 0.1     | 0.1     | 0.1     | 0.1      |
| hsa-miR-149-3p   | 0.1     | 0.1     | 0.1     | 0.1      |
| hsa-miR-149-5p   | 2.27288 | 2.10626 | 0.1     | 2.34681  |
| hsa-miR-150-3p   | 1.1488  | 1.54922 | 8.58649 | 0.990472 |
| hsa-miR-150-5p   | 0.1     | 0.1     | 0.1     | 0.1      |
| hsa-miR-151a-3p  | 16.5823 | 18.9815 | 14.4579 | 22.8759  |
| hsa-miR-151a-5p  | 59.2107 | 64.2104 | 72.3252 | 81.5449  |
| hsa-miR-151b     | 29.199  | 33.7053 | 31.5282 | 39.8117  |
| hsa-miR-152-3p   | 0.1     | 0.1     | 0.1     | 0.1      |
| hsa-miR-152-5p   | 0.1     | 0.1     | 0.1     | 0.1      |
| hsa-miR-153-3p   | 0.1     | 0.1     | 0.1     | 0.1      |
| hsa-miR-153-5p   | 0.1     | 0.1     | 0.1     | 0.1      |

|                   |          |         |         |         |
|-------------------|----------|---------|---------|---------|
| hsa-miR-1537-3p   | 0.1      | 0.1     | 0.1     | 0.1     |
| hsa-miR-1537-5p   | 0.1      | 0.1     | 0.1     | 0.1     |
| hsa-miR-1538      | 0.1      | 0.1     | 0.1     | 0.1     |
| hsa-miR-1539      | 0.1      | 0.1     | 0.1     | 0.1     |
| hsa-miR-154-3p    | 0.1      | 0.1     | 0.1     | 1.92458 |
| hsa-miR-154-5p    | 0.1      | 0.1     | 0.1     | 0.1     |
| hsa-miR-155-3p    | 0.1      | 0.1     | 0.1     | 0.1     |
| hsa-miR-155-5p    | 0.1      | 0.1     | 0.1     | 0.1     |
| hsa-miR-1587      | 8.76698  | 9.62748 | 12.3398 | 7.84752 |
| hsa-miR-15a-3p    | 0.1      | 0.1     | 0.1     | 0.1     |
| hsa-miR-15a-5p    | 56.6189  | 54.3719 | 48.9565 | 68.3459 |
| hsa-miR-15b-3p    | 0.790755 | 1.10143 | 0.1     | 1.27457 |
| hsa-miR-15b-5p    | 321.584  | 313.987 | 247.91  | 357.466 |
| hsa-miR-1-5p      | 0.1      | 0.1     | 0.1     | 0.1     |
| hsa-miR-16-1-3p   | 0.1      | 0.1     | 0.1     | 0.1     |
| hsa-miR-16-2-3p   | 2.33823  | 3.28391 | 1.99633 | 2.5927  |
| hsa-miR-16-5p     | 466.566  | 481.523 | 406.755 | 510.086 |
| hsa-miR-17-3p     | 3.20849  | 3.98437 | 0.1     | 2.56696 |
| hsa-miR-17-5p     | 97.5544  | 97.1912 | 61.7061 | 83.729  |
| hsa-miR-181a-2-3p | 0.1      | 2.36484 | 0.1     | 2.74539 |
| hsa-miR-181a-3p   | 0.1      | 0.1     | 0.1     | 1.74865 |
| hsa-miR-181a-5p   | 15.2733  | 40.1894 | 28.4765 | 44.1969 |
| hsa-miR-181b-2-3p | 0.1      | 0.1     | 0.1     | 0.1     |
| hsa-miR-181b-3p   | 0.1      | 0.1     | 0.1     | 0.1     |
| hsa-miR-181b-5p   | 6.16952  | 18.3422 | 11.72   | 23.0121 |
| hsa-miR-181c-3p   | 0.1      | 0.1     | 0.1     | 0.1     |
| hsa-miR-181c-5p   | 0.1      | 0.1     | 0.1     | 0.1     |
| hsa-miR-181d-3p   | 0.1      | 0.1     | 0.1     | 0.1     |
| hsa-miR-181d-5p   | 0.1      | 2.05482 | 0.1     | 2.7405  |
| hsa-miR-182-3p    | 0.1      | 0.1     | 0.1     | 0.1     |
| hsa-miR-1825      | 0.1      | 0.1     | 0.1     | 0.1     |
| hsa-miR-182-5p    | 3.02022  | 4.29087 | 2.02042 | 4.89969 |
| hsa-miR-1827      | 0.1      | 0.1     | 0.1     | 0.1     |
| hsa-miR-183-3p    | 0.1      | 0.1     | 0.1     | 0.1     |
| hsa-miR-183-5p    | 2.17779  | 2.40535 | 2.90691 | 4.34678 |
| hsa-miR-184       | 0.1      | 0.1     | 0.1     | 0.1     |
| hsa-miR-185-3p    | 0.1      | 0.1     | 0.1     | 0.1     |
| hsa-miR-185-5p    | 7.51614  | 7.8449  | 5.54607 | 9.78651 |
| hsa-miR-186-3p    | 0.1      | 0.1     | 0.1     | 0.1     |
| hsa-miR-186-5p    | 1.87782  | 0.1     | 3.18453 | 2.20567 |
| hsa-miR-187-3p    | 0.1      | 0.1     | 0.1     | 0.1     |
| hsa-miR-187-5p    | 0.1      | 0.1     | 0.1     | 0.1     |
| hsa-miR-188-3p    | 0.1      | 0.1     | 0.1     | 0.1     |
| hsa-miR-188-5p    | 3.73347  | 0.1     | 5.58633 | 0.1     |
| hsa-miR-18a-3p    | 0.1      | 0.1     | 0.1     | 0.1     |
| hsa-miR-18a-5p    | 10.9753  | 12.1498 | 2.35792 | 8.67464 |
| hsa-miR-18b-3p    | 0.1      | 0.1     | 0.1     | 0.1     |
| hsa-miR-18b-5p    | 2.92445  | 2.98795 | 1.22156 | 2.37744 |
| hsa-miR-1908-3p   | 0.1      | 0.1     | 0.1     | 0.1     |
| hsa-miR-1908-5p   | 0.1      | 0.1     | 0.1     | 0.1     |
| hsa-miR-1909-3p   | 0.1      | 0.1     | 0.1     | 0.1     |
| hsa-miR-1909-5p   | 0.1      | 0.1     | 0.1     | 0.1     |
| hsa-miR-190a-3p   | 0.1      | 0.1     | 0.1     | 0.1     |



|                  |         |         |         |         |
|------------------|---------|---------|---------|---------|
| hsa-miR-190a-5p  | 0.1     | 0.1     | 0.1     | 0.1     |
| hsa-miR-190b     | 0.1     | 0.1     | 0.1     | 0.1     |
| hsa-miR-1910-3p  | 0.1     | 0.1     | 0.1     | 0.1     |
| hsa-miR-1910-5p  | 0.1     | 0.1     | 0.1     | 0.1     |
| hsa-miR-1911-3p  | 0.1     | 0.1     | 0.1     | 0.1     |
| hsa-miR-1911-5p  | 0.1     | 0.1     | 0.1     | 0.1     |
| hsa-miR-1912     | 0.1     | 0.1     | 0.1     | 0.1     |
| hsa-miR-1913     | 0.1     | 0.1     | 0.1     | 0.1     |
| hsa-miR-191-3p   | 0.1     | 0.1     | 0.1     | 0.1     |
| hsa-miR-1914-3p  | 3.13398 | 0.1     | 1.9375  | 1.82469 |
| hsa-miR-1914-5p  | 0.1     | 0.1     | 0.1     | 0.1     |
| hsa-miR-1915-3p  | 25.659  | 23.775  | 25.9002 | 15.1081 |
| hsa-miR-1915-5p  | 0.1     | 0.1     | 0.1     | 0.1     |
| hsa-miR-191-5p   | 0.1     | 0.1     | 0.1     | 0.1     |
| hsa-miR-192-3p   | 3.79074 | 1.75367 | 2.0373  | 2.14499 |
| hsa-miR-192-5p   | 328.163 | 173.349 | 268.686 | 227.28  |
| hsa-miR-193a-3p  | 3.93681 | 8.20868 | 3.62876 | 7.95082 |
| hsa-miR-193a-5p  | 0.1     | 0.1     | 0.1     | 0.1     |
| hsa-miR-193b-3p  | 129.223 | 263.916 | 153.311 | 267.915 |
| hsa-miR-193b-5p  | 0.1     | 2.71474 | 0.1     | 1.9467  |
| hsa-miR-194-3p   | 0.1     | 0.1     | 0.1     | 0.1     |
| hsa-miR-194-5p   | 139.266 | 86.3635 | 119.511 | 117.972 |
| hsa-miR-195-3p   | 0.1     | 0.1     | 0.1     | 0.1     |
| hsa-miR-195-5p   | 2.61628 | 2.93218 | 2.74647 | 2.44582 |
| hsa-miR-196a-3p  | 0.1     | 0.1     | 0.1     | 0.1     |
| hsa-miR-196a-5p  | 6.36498 | 5.88468 | 3.31587 | 7.37517 |
| hsa-miR-196b-3p  | 0.1     | 0.1     | 0.1     | 0.1     |
| hsa-miR-196b-5p  | 2.5107  | 2.56799 | 2.22135 | 3.04566 |
| hsa-miR-1972     | 0.1     | 0.1     | 3.76156 | 0.1     |
| hsa-miR-1973     | 34.2023 | 27.6989 | 35.4183 | 29.2851 |
| hsa-miR-197-3p   | 2.13218 | 2.22202 | 2.15819 | 1.99049 |
| hsa-miR-197-5p   | 27.9701 | 28.673  | 30.2469 | 26.0978 |
| hsa-miR-1976     | 0.1     | 0.1     | 0.1     | 0.1     |
| hsa-miR-198      | 0.1     | 0.1     | 0.1     | 0.1     |
| hsa-miR-199a-3p  | 0.1     | 0.1     | 0.1     | 0.1     |
| hsa-miR-199a-5p  | 0.1     | 0.1     | 0.1     | 0.1     |
| hsa-miR-199b-5p  | 0.1     | 0.1     | 0.1     | 0.1     |
| hsa-miR-19a-3p   | 53.2501 | 65.7195 | 16.2307 | 58.6204 |
| hsa-miR-19a-5p   | 0.1     | 0.1     | 0.1     | 0.1     |
| hsa-miR-19b-1-5p | 0.1     | 0.1     | 0.1     | 0.1     |
| hsa-miR-19b-2-5p | 0.1     | 0.1     | 0.1     | 0.1     |
| hsa-miR-19b-3p   | 205.89  | 225.405 | 71.7765 | 197.399 |
| hsa-miR-200a-3p  | 0.1     | 0.1     | 0.1     | 1.89373 |
| hsa-miR-200a-5p  | 0.1     | 0.1     | 0.1     | 0.1     |
| hsa-miR-200b-3p  | 2.065   | 6.45235 | 1.97192 | 6.60081 |
| hsa-miR-200b-5p  | 0.1     | 0.1     | 0.1     | 0.1     |
| hsa-miR-200c-3p  | 0.1     | 0.1     | 0.1     | 0.1     |
| hsa-miR-200c-5p  | 0.1     | 0.1     | 0.1     | 0.1     |
| hsa-miR-202-3p   | 0.1     | 0.1     | 0.1     | 0.1     |
| hsa-miR-202-5p   | 0.1     | 0.1     | 0.1     | 0.1     |
| hsa-miR-203a-3p  | 0.1     | 0.1     | 0.1     | 0.1     |
| hsa-miR-203a-5p  | 0.1     | 0.1     | 0.1     | 0.1     |
| hsa-miR-203b-3p  | 0.1     | 0.1     | 0.1     | 0.1     |

|                   |         |         |         |         |
|-------------------|---------|---------|---------|---------|
| hsa-miR-203b-5p   | 0.1     | 0.1     | 0.1     | 0.1     |
| hsa-miR-204-3p    | 0.1     | 0.1     | 0.1     | 0.1     |
| hsa-miR-204-5p    | 0.1     | 0.1     | 0.1     | 0.1     |
| hsa-miR-2052      | 0.1     | 0.1     | 0.1     | 0.1     |
| hsa-miR-2053      | 0.1     | 0.1     | 0.1     | 0.1     |
| hsa-miR-205-3p    | 0.1     | 0.1     | 0.1     | 0.1     |
| hsa-miR-205-5p    | 0.1     | 0.1     | 0.1     | 0.1     |
| hsa-miR-206       | 0.1     | 0.1     | 0.1     | 0.1     |
| hsa-miR-208a-3p   | 0.1     | 0.1     | 0.1     | 0.1     |
| hsa-miR-208a-5p   | 0.1     | 0.1     | 0.1     | 0.1     |
| hsa-miR-208b-3p   | 0.1     | 0.1     | 0.1     | 0.1     |
| hsa-miR-208b-5p   | 0.1     | 0.1     | 0.1     | 0.1     |
| hsa-miR-20a-3p    | 0.1     | 1.88671 | 0.1     | 0.1     |
| hsa-miR-20a-5p    | 185.537 | 195.419 | 131.377 | 156.317 |
| hsa-miR-20b-3p    | 0.1     | 0.1     | 0.1     | 0.1     |
| hsa-miR-20b-5p    | 52.1499 | 56.7959 | 37.4412 | 44.9273 |
| hsa-miR-210-3p    | 16.7008 | 19.8483 | 8.41841 | 20.7808 |
| hsa-miR-210-5p    | 0.1     | 0.1     | 0.1     | 0.1     |
| hsa-miR-2110      | 0.1     | 0.1     | 0.1     | 0.1     |
| hsa-miR-2113      | 0.1     | 0.1     | 0.1     | 0.1     |
| hsa-miR-211-3p    | 0.1     | 0.1     | 0.1     | 0.1     |
| hsa-miR-2114-3p   | 0.1     | 0.1     | 0.1     | 0.1     |
| hsa-miR-2114-5p   | 0.1     | 0.1     | 0.1     | 0.1     |
| hsa-miR-2115-3p   | 0.1     | 0.1     | 0.1     | 0.1     |
| hsa-miR-2115-5p   | 0.1     | 0.1     | 0.1     | 0.1     |
| hsa-miR-211-5p    | 0.1     | 0.1     | 0.1     | 0.1     |
| hsa-miR-2116-3p   | 0.1     | 0.1     | 0.1     | 0.1     |
| hsa-miR-2116-5p   | 0.1     | 0.1     | 0.1     | 0.1     |
| hsa-miR-2117      | 0.1     | 0.1     | 0.1     | 0.1     |
| hsa-miR-212-3p    | 0.1     | 0.1     | 0.1     | 0.1     |
| hsa-miR-212-5p    | 0.1     | 0.1     | 0.1     | 0.1     |
| hsa-miR-21-3p     | 30.251  | 61.6796 | 4.13878 | 34.8386 |
| hsa-miR-214-3p    | 0.1     | 0.1     | 0.1     | 0.1     |
| hsa-miR-214-5p    | 0.1     | 0.1     | 0.1     | 0.1     |
| hsa-miR-215-3p    | 0.1     | 0.1     | 0.1     | 0.1     |
| hsa-miR-215-5p    | 221.818 | 115.907 | 182.286 | 155.219 |
| hsa-miR-21-5p     | 6615.52 | 8331.83 | 4902.56 | 8788.46 |
| hsa-miR-216a-3p   | 0.1     | 0.1     | 0.1     | 0.1     |
| hsa-miR-216a-5p   | 0.1     | 0.1     | 0.1     | 0.1     |
| hsa-miR-216b-3p   | 0.1     | 0.1     | 0.1     | 0.1     |
| hsa-miR-216b-5p   | 0.1     | 0.1     | 0.1     | 0.1     |
| hsa-miR-217       | 0.1     | 0.1     | 0.1     | 0.1     |
| hsa-miR-218-1-3p  | 0.1     | 0.1     | 0.1     | 0.1     |
| hsa-miR-218-2-3p  | 0.1     | 0.1     | 0.1     | 0.1     |
| hsa-miR-218-5p    | 1.63166 | 7.02087 | 0.1     | 6.81268 |
| hsa-miR-219a-1-3p | 0.1     | 0.1     | 0.1     | 0.1     |
| hsa-miR-219a-2-3p | 0.1     | 0.1     | 0.1     | 0.1     |
| hsa-miR-219a-5p   | 0.1     | 0.1     | 0.1     | 0.1     |
| hsa-miR-219b-3p   | 0.1     | 0.1     | 0.1     | 0.1     |
| hsa-miR-219b-5p   | 0.1     | 0.1     | 0.1     | 0.1     |
| hsa-miR-221-3p    | 40.3524 | 33.3154 | 36.7892 | 42.5429 |
| hsa-miR-221-5p    | 0.1     | 0.1     | 0.1     | 1.77584 |
| hsa-miR-222-3p    | 17.6726 | 11.2002 | 32.2092 | 14.0242 |

|                  |         |         |         |         |
|------------------|---------|---------|---------|---------|
| hsa-miR-222-5p   | 0.1     | 0.1     | 0.1     | 0.1     |
| hsa-miR-223-3p   | 0.1     | 0.1     | 0.1     | 0.1     |
| hsa-miR-223-5p   | 0.1     | 0.1     | 0.1     | 0.1     |
| hsa-miR-22-3p    | 130.916 | 199.878 | 109.131 | 222.804 |
| hsa-miR-224-3p   | 6.52484 | 3.01983 | 5.1502  | 5.30981 |
| hsa-miR-224-5p   | 156.602 | 101.511 | 157.34  | 119.401 |
| hsa-miR-22-5p    | 3.1984  | 5.66334 | 0.1     | 4.68756 |
| hsa-miR-2276-3p  | 0.1     | 0.1     | 0.1     | 0.1     |
| hsa-miR-2276-5p  | 0.1     | 0.1     | 0.1     | 0.1     |
| hsa-miR-2277-3p  | 0.1     | 0.1     | 0.1     | 0.1     |
| hsa-miR-2277-5p  | 0.1     | 0.1     | 0.1     | 0.1     |
| hsa-miR-2278     | 0.1     | 0.1     | 0.1     | 0.1     |
| hsa-miR-2355-3p  | 0.1     | 0.1     | 0.1     | 0.1     |
| hsa-miR-2355-5p  | 0.1     | 0.1     | 0.1     | 0.1     |
| hsa-miR-2392     | 0.1     | 0.1     | 0.1     | 0.1     |
| hsa-miR-23a-3p   | 394.126 | 825.429 | 463.932 | 927.99  |
| hsa-miR-23a-5p   | 0.1     | 0.1     | 0.1     | 0.1     |
| hsa-miR-23b-3p   | 299.862 | 221.302 | 324.003 | 279.889 |
| hsa-miR-23b-5p   | 0.1     | 0.1     | 0.1     | 0.1     |
| hsa-miR-23c      | 0.1     | 0.1     | 0.1     | 0.1     |
| hsa-miR-24-1-5p  | 0.1     | 0.1     | 0.1     | 0.1     |
| hsa-miR-24-2-5p  | 0.1     | 0.1     | 0.1     | 0.1     |
| hsa-miR-24-3p    | 287.439 | 406.282 | 249.984 | 483.559 |
| hsa-miR-2467-3p  | 0.1     | 0.1     | 0.1     | 0.1     |
| hsa-miR-2467-5p  | 0.1     | 0.1     | 0.1     | 0.1     |
| hsa-miR-25-3p    | 88.2441 | 86.9416 | 69.6381 | 91.3267 |
| hsa-miR-25-5p    | 0.1     | 0.1     | 0.1     | 0.1     |
| hsa-miR-2681-3p  | 0.1     | 0.1     | 0.1     | 0.1     |
| hsa-miR-2681-5p  | 0.1     | 0.1     | 0.1     | 0.1     |
| hsa-miR-2682-3p  | 0.1     | 0.1     | 0.1     | 0.1     |
| hsa-miR-2682-5p  | 0.1     | 0.1     | 0.1     | 0.1     |
| hsa-miR-26a-1-3p | 0.1     | 0.1     | 0.1     | 0.1     |
| hsa-miR-26a-2-3p | 0.1     | 0.1     | 0.1     | 0.1     |
| hsa-miR-26a-5p   | 57.4323 | 60.6612 | 49.759  | 54.6455 |
| hsa-miR-26b-3p   | 0.1     | 0.1     | 0.1     | 0.1     |
| hsa-miR-26b-5p   | 86.9928 | 72.4115 | 72.195  | 79.6017 |
| hsa-miR-27a-3p   | 218.098 | 509.619 | 163.317 | 503.194 |
| hsa-miR-27a-5p   | 0.1     | 0.1     | 0.1     | 0.1     |
| hsa-miR-27b-3p   | 359.971 | 278.554 | 281.264 | 333.293 |
| hsa-miR-27b-5p   | 0.1     | 0.1     | 0.1     | 0.1     |
| hsa-miR-28-3p    | 0.1     | 0.1     | 0.1     | 0.1     |
| hsa-miR-28-5p    | 7.95081 | 7.7159  | 8.57142 | 9.39147 |
| hsa-miR-2861     | 17.788  | 19.4794 | 23.8102 | 14.9938 |
| hsa-miR-2909     | 0.1     | 0.1     | 0.1     | 0.1     |
| hsa-miR-296-3p   | 0.1     | 0.1     | 0.1     | 0.1     |
| hsa-miR-296-5p   | 0.1     | 0.1     | 0.1     | 0.1     |
| hsa-miR-297      | 0.1     | 0.1     | 0.1     | 0.1     |
| hsa-miR-298      | 0.1     | 0.1     | 0.1     | 0.1     |
| hsa-miR-299-3p   | 0.1     | 0.1     | 0.1     | 0.1     |
| hsa-miR-299-5p   | 0.1     | 0.1     | 0.1     | 0.1     |
| hsa-miR-29a-3p   | 534.378 | 546.386 | 383.653 | 650.999 |
| hsa-miR-29a-5p   | 0.1     | 0.1     | 0.1     | 0.1     |
| hsa-miR-29b-1-5p | 6.13247 | 7.38601 | 0.1     | 4.02032 |

|                  |         |         |         |         |
|------------------|---------|---------|---------|---------|
| hsa-miR-29b-2-5p | 0.1     | 0.1     | 0.1     | 0.1     |
| hsa-miR-29b-3p   | 236.945 | 268.924 | 195.603 | 366.579 |
| hsa-miR-29c-3p   | 164.523 | 143.844 | 96.171  | 160.225 |
| hsa-miR-29c-5p   | 0.1     | 0.1     | 0.1     | 0.1     |
| hsa-miR-300      | 0.1     | 0.1     | 0.1     | 0.1     |
| hsa-miR-301a-3p  | 5.78439 | 7.22344 | 2.86061 | 11.153  |
| hsa-miR-301a-5p  | 0.1     | 0.1     | 0.1     | 0.1     |
| hsa-miR-301b-3p  | 0.1     | 0.1     | 0.1     | 0.1     |
| hsa-miR-301b-5p  | 0.1     | 0.1     | 0.1     | 0.1     |
| hsa-miR-302a-3p  | 0.1     | 0.1     | 0.1     | 0.1     |
| hsa-miR-302a-5p  | 0.1     | 0.1     | 0.1     | 0.1     |
| hsa-miR-302b-3p  | 0.1     | 0.1     | 0.1     | 0.1     |
| hsa-miR-302b-5p  | 0.1     | 0.1     | 0.1     | 0.1     |
| hsa-miR-302c-3p  | 0.1     | 0.1     | 0.1     | 0.1     |
| hsa-miR-302c-5p  | 0.1     | 0.1     | 0.1     | 0.1     |
| hsa-miR-302d-3p  | 0.1     | 0.1     | 0.1     | 0.1     |
| hsa-miR-302d-5p  | 0.1     | 0.1     | 0.1     | 0.1     |
| hsa-miR-302e     | 0.1     | 0.1     | 0.1     | 0.1     |
| hsa-miR-302f     | 0.1     | 0.1     | 0.1     | 0.1     |
| hsa-miR-3064-3p  | 0.1     | 0.1     | 0.1     | 0.1     |
| hsa-miR-3064-5p  | 0.1     | 0.1     | 0.1     | 0.1     |
| hsa-miR-3065-3p  | 0.1     | 0.1     | 0.1     | 0.1     |
| hsa-miR-3065-5p  | 0.1     | 0.1     | 0.1     | 0.1     |
| hsa-miR-3074-3p  | 0.1     | 0.1     | 0.1     | 0.1     |
| hsa-miR-3074-5p  | 0.1     | 0.1     | 0.1     | 0.1     |
| hsa-miR-30a-3p   | 12.9178 | 14.4282 | 11.2442 | 12.3415 |
| hsa-miR-30a-5p   | 100.395 | 100.155 | 112.417 | 103.018 |
| hsa-miR-30b-3p   | 0.1     | 0.1     | 0.1     | 0.1     |
| hsa-miR-30b-5p   | 73.9505 | 51.3855 | 54.4978 | 56.7747 |
| hsa-miR-30c-1-3p | 0.1     | 0.1     | 0.1     | 0.1     |
| hsa-miR-30c-2-3p | 0.1     | 0.1     | 0.1     | 0.1     |
| hsa-miR-30c-5p   | 35.6957 | 29.2843 | 39.6078 | 28.5233 |
| hsa-miR-30d-3p   | 0.1     | 0.1     | 0.1     | 0.1     |
| hsa-miR-30d-5p   | 26.8696 | 23.2426 | 30.358  | 27.8272 |
| hsa-miR-30e-3p   | 5.62847 | 5.93406 | 3.34636 | 4.37713 |
| hsa-miR-30e-5p   | 15.3284 | 18.6238 | 12.8286 | 19.7245 |
| hsa-miR-3115     | 0.1     | 0.1     | 0.1     | 0.1     |
| hsa-miR-3116     | 0.1     | 0.1     | 0.1     | 0.1     |
| hsa-miR-3117-3p  | 0.1     | 0.1     | 0.1     | 0.1     |
| hsa-miR-3117-5p  | 0.1     | 0.1     | 0.1     | 0.1     |
| hsa-miR-3118     | 0.1     | 0.1     | 0.1     | 0.1     |
| hsa-miR-3119     | 0.1     | 0.1     | 0.1     | 0.1     |
| hsa-miR-3120-3p  | 0.1     | 0.1     | 0.1     | 0.1     |
| hsa-miR-3120-5p  | 0.1     | 0.1     | 0.1     | 0.1     |
| hsa-miR-3121-3p  | 0.1     | 0.1     | 0.1     | 0.1     |
| hsa-miR-3121-5p  | 0.1     | 0.1     | 0.1     | 0.1     |
| hsa-miR-3122     | 0.1     | 0.1     | 0.1     | 0.1     |
| hsa-miR-3123     | 0.1     | 0.1     | 0.1     | 0.1     |
| hsa-miR-3124-3p  | 0.1     | 0.1     | 0.1     | 0.1     |
| hsa-miR-3124-5p  | 0.1     | 0.1     | 0.1     | 0.1     |
| hsa-miR-3125     | 0.1     | 0.1     | 0.1     | 0.1     |
| hsa-miR-3126-3p  | 0.1     | 0.1     | 0.1     | 0.1     |
| hsa-miR-3126-5p  | 0.1     | 0.1     | 0.1     | 0.1     |

|                  |         |         |         |         |
|------------------|---------|---------|---------|---------|
| hsa-miR-3127-3p  | 0.1     | 0.1     | 0.1     | 0.1     |
| hsa-miR-3127-5p  | 0.1     | 0.1     | 0.1     | 0.1     |
| hsa-miR-3128     | 0.1     | 0.1     | 0.1     | 0.1     |
| hsa-miR-3129-3p  | 0.1     | 0.1     | 0.1     | 0.1     |
| hsa-miR-3129-5p  | 0.1     | 0.1     | 0.1     | 0.1     |
| hsa-miR-3130-3p  | 0.1     | 0.1     | 0.1     | 0.1     |
| hsa-miR-3130-5p  | 0.1     | 0.1     | 0.1     | 0.1     |
| hsa-miR-3131     | 0.1     | 0.1     | 0.1     | 0.1     |
| hsa-miR-3132     | 0.1     | 0.1     | 0.1     | 0.1     |
| hsa-miR-3133     | 0.1     | 0.1     | 0.1     | 0.1     |
| hsa-miR-3134     | 0.1     | 0.1     | 0.1     | 0.1     |
| hsa-miR-3135a    | 0.1     | 0.1     | 0.1     | 0.1     |
| hsa-miR-3135b    | 2.7995  | 3.64069 | 3.18777 | 2.82218 |
| hsa-miR-3136-3p  | 0.1     | 0.1     | 0.1     | 0.1     |
| hsa-miR-3136-5p  | 0.1     | 0.1     | 0.1     | 0.1     |
| hsa-miR-3137     | 0.1     | 0.1     | 0.1     | 0.1     |
| hsa-miR-3138     | 0.1     | 0.1     | 0.1     | 0.1     |
| hsa-miR-3139     | 0.1     | 0.1     | 0.1     | 0.1     |
| hsa-miR-31-3p    | 62.3403 | 191.451 | 31.4383 | 177.09  |
| hsa-miR-3140-3p  | 0.1     | 0.1     | 0.1     | 0.1     |
| hsa-miR-3140-5p  | 0.1     | 0.1     | 0.1     | 0.1     |
| hsa-miR-3141     | 0.1     | 0.1     | 0.1     | 0.1     |
| hsa-miR-3142     | 0.1     | 0.1     | 0.1     | 0.1     |
| hsa-miR-3143     | 0.1     | 0.1     | 0.1     | 0.1     |
| hsa-miR-3144-3p  | 0.1     | 0.1     | 0.1     | 0.1     |
| hsa-miR-3144-5p  | 0.1     | 0.1     | 0.1     | 0.1     |
| hsa-miR-3145-3p  | 0.1     | 0.1     | 0.1     | 0.1     |
| hsa-miR-3145-5p  | 0.1     | 0.1     | 0.1     | 0.1     |
| hsa-miR-3146     | 0.1     | 0.1     | 0.1     | 0.1     |
| hsa-miR-3147     | 0.1     | 0.1     | 0.1     | 0.1     |
| hsa-miR-3148     | 0.1     | 0.1     | 0.1     | 0.1     |
| hsa-miR-3149     | 0.1     | 0.1     | 0.1     | 0.1     |
| hsa-miR-3150a-3p | 0.1     | 0.1     | 0.1     | 0.1     |
| hsa-miR-3150a-5p | 0.1     | 0.1     | 0.1     | 0.1     |
| hsa-miR-3150b-3p | 0.1     | 0.1     | 0.1     | 0.1     |
| hsa-miR-3150b-5p | 0.1     | 0.1     | 0.1     | 0.1     |
| hsa-miR-3151-3p  | 0.1     | 0.1     | 0.1     | 0.1     |
| hsa-miR-3151-5p  | 0.1     | 0.1     | 0.1     | 0.1     |
| hsa-miR-3152-3p  | 0.1     | 0.1     | 0.1     | 0.1     |
| hsa-miR-3152-5p  | 0.1     | 0.1     | 0.1     | 0.1     |
| hsa-miR-3153     | 0.1     | 0.1     | 0.1     | 0.1     |
| hsa-miR-3154     | 0.1     | 0.1     | 0.1     | 0.1     |
| hsa-miR-3155a    | 0.1     | 0.1     | 0.1     | 0.1     |
| hsa-miR-3155b    | 0.1     | 0.1     | 0.1     | 0.1     |
| hsa-miR-3156-3p  | 0.1     | 0.1     | 0.1     | 0.1     |
| hsa-miR-3156-5p  | 0.1     | 0.1     | 0.1     | 0.1     |
| hsa-miR-3157-3p  | 0.1     | 0.1     | 0.1     | 0.1     |
| hsa-miR-3157-5p  | 0.1     | 0.1     | 0.1     | 0.1     |
| hsa-miR-3158-3p  | 0.1     | 0.1     | 0.1     | 0.1     |
| hsa-miR-3158-5p  | 0.1     | 0.1     | 0.1     | 0.1     |
| hsa-miR-3159     | 0.1     | 0.1     | 0.1     | 0.1     |
| hsa-miR-31-5p    | 139.986 | 332.586 | 153.205 | 304.068 |
| hsa-miR-3160-3p  | 0.1     | 0.1     | 0.1     | 0.1     |

|                 |         |         |         |         |
|-----------------|---------|---------|---------|---------|
| hsa-miR-3160-5p | 0.1     | 0.1     | 0.1     | 0.1     |
| hsa-miR-3161    | 0.1     | 0.1     | 0.1     | 0.1     |
| hsa-miR-3162-3p | 0.1     | 0.1     | 0.1     | 0.1     |
| hsa-miR-3162-5p | 49.9301 | 60.0999 | 65.2393 | 62.7895 |
| hsa-miR-3163    | 0.1     | 0.1     | 0.1     | 0.1     |
| hsa-miR-3164    | 0.1     | 0.1     | 0.1     | 0.1     |
| hsa-miR-3165    | 0.1     | 0.1     | 0.1     | 0.1     |
| hsa-miR-3166    | 0.1     | 0.1     | 0.1     | 0.1     |
| hsa-miR-3167    | 0.1     | 0.1     | 0.1     | 0.1     |
| hsa-miR-3168    | 0.1     | 0.1     | 0.1     | 0.1     |
| hsa-miR-3169    | 0.1     | 0.1     | 0.1     | 0.1     |
| hsa-miR-3170    | 0.1     | 0.1     | 0.1     | 0.1     |
| hsa-miR-3171    | 0.1     | 0.1     | 0.1     | 0.1     |
| hsa-miR-3173-3p | 0.1     | 0.1     | 0.1     | 0.1     |
| hsa-miR-3173-5p | 0.1     | 0.1     | 0.1     | 0.1     |
| hsa-miR-3174    | 0.1     | 0.1     | 0.1     | 0.1     |
| hsa-miR-3175    | 0.1     | 0.1     | 0.1     | 0.1     |
| hsa-miR-3176    | 0.1     | 0.1     | 0.1     | 0.1     |
| hsa-miR-3177-3p | 0.1     | 0.1     | 0.1     | 0.1     |
| hsa-miR-3177-5p | 0.1     | 0.1     | 0.1     | 0.1     |
| hsa-miR-3178    | 0.1     | 0.1     | 0.1     | 0.1     |
| hsa-miR-3179    | 0.1     | 0.1     | 0.1     | 0.1     |
| hsa-miR-3180    | 0.1     | 0.1     | 0.1     | 0.1     |
| hsa-miR-3180-3p | 0.1     | 0.1     | 0.1     | 0.1     |
| hsa-miR-3180-5p | 0.1     | 0.1     | 0.1     | 0.1     |
| hsa-miR-3181    | 0.1     | 0.1     | 0.1     | 0.1     |
| hsa-miR-3182    | 0.1     | 0.1     | 0.1     | 0.1     |
| hsa-miR-3183    | 0.1     | 0.1     | 0.1     | 0.1     |
| hsa-miR-3184-3p | 0.1     | 0.1     | 0.1     | 0.1     |
| hsa-miR-3184-5p | 0.1     | 0.1     | 0.1     | 0.1     |
| hsa-miR-3185    | 0.1     | 0.1     | 0.1     | 0.1     |
| hsa-miR-3186-3p | 0.1     | 0.1     | 0.1     | 0.1     |
| hsa-miR-3186-5p | 0.1     | 0.1     | 0.1     | 0.1     |
| hsa-miR-3187-3p | 0.1     | 0.1     | 0.1     | 0.1     |
| hsa-miR-3187-5p | 0.1     | 0.1     | 0.1     | 0.1     |
| hsa-miR-3188    | 0.1     | 0.1     | 0.1     | 0.1     |
| hsa-miR-3189-3p | 0.1     | 0.1     | 0.1     | 0.1     |
| hsa-miR-3189-5p | 0.1     | 0.1     | 0.1     | 0.1     |
| hsa-miR-3190-3p | 0.1     | 0.1     | 0.1     | 0.1     |
| hsa-miR-3190-5p | 0.1     | 0.1     | 0.1     | 0.1     |
| hsa-miR-3191-3p | 0.1     | 0.1     | 0.1     | 0.1     |
| hsa-miR-3191-5p | 0.1     | 0.1     | 0.1     | 0.1     |
| hsa-miR-3192-3p | 0.1     | 0.1     | 0.1     | 0.1     |
| hsa-miR-3192-5p | 0.1     | 0.1     | 0.1     | 0.1     |
| hsa-miR-3193    | 0.1     | 0.1     | 0.1     | 0.1     |
| hsa-miR-3194-3p | 0.1     | 0.1     | 0.1     | 0.1     |
| hsa-miR-3194-5p | 0.1     | 0.1     | 0.1     | 0.1     |
| hsa-miR-3195    | 7.26253 | 10.9607 | 3.48287 | 12.2666 |
| hsa-miR-3196    | 11.4032 | 12.803  | 10.4639 | 10.898  |
| hsa-miR-3197    | 0.1     | 0.1     | 0.1     | 0.1     |
| hsa-miR-3198    | 8.34492 | 8.54268 | 8.60257 | 10.0996 |
| hsa-miR-3199    | 0.1     | 0.1     | 0.1     | 0.1     |
| hsa-miR-3200-3p | 0.1     | 0.1     | 0.1     | 0.1     |

|                 |         |          |         |         |
|-----------------|---------|----------|---------|---------|
| hsa-miR-3200-5p | 0.1     | 0.1      | 0.1     | 0.1     |
| hsa-miR-3201    | 0.1     | 0.1      | 0.1     | 0.1     |
| hsa-miR-3202    | 0.1     | 0.1      | 0.1     | 0.1     |
| hsa-miR-320a    | 26.9665 | 27.9064  | 73.0187 | 45.9115 |
| hsa-miR-320b    | 40.7636 | 45.8782  | 103.686 | 71.4328 |
| hsa-miR-320c    | 33.205  | 36.0841  | 79.9948 | 51.6107 |
| hsa-miR-320d    | 46.0511 | 47.4246  | 112.26  | 72.7508 |
| hsa-miR-320e    | 39.0851 | 39.3696  | 94.6616 | 61.1138 |
| hsa-miR-323a-3p | 0.1     | 0.1      | 0.1     | 0.1     |
| hsa-miR-323a-5p | 0.1     | 0.1      | 0.1     | 0.1     |
| hsa-miR-323b-3p | 0.1     | 0.1      | 0.1     | 0.1     |
| hsa-miR-323b-5p | 0.1     | 0.1      | 0.1     | 0.1     |
| hsa-miR-32-3p   | 0.1     | 0.1      | 0.1     | 0.1     |
| hsa-miR-324-3p  | 16.6317 | 19.4317  | 14.6542 | 22.6652 |
| hsa-miR-324-5p  | 10.6694 | 8.7843   | 8.73373 | 13.7577 |
| hsa-miR-325     | 0.1     | 0.1      | 0.1     | 0.1     |
| hsa-miR-32-5p   | 0.1     | 0.1      | 0.1     | 0.1     |
| hsa-miR-326     | 0.1     | 0.1      | 0.1     | 0.1     |
| hsa-miR-328-3p  | 1.75061 | 0.1      | 0.1     | 1.67107 |
| hsa-miR-328-5p  | 0.1     | 0.1      | 0.1     | 0.1     |
| hsa-miR-329-3p  | 0.1     | 0.1      | 0.1     | 0.1     |
| hsa-miR-329-5p  | 0.1     | 0.1      | 0.1     | 0.1     |
| hsa-miR-330-3p  | 0.1     | 0.1      | 0.1     | 0.1     |
| hsa-miR-330-5p  | 0.1     | 0.1      | 0.1     | 0.1     |
| hsa-miR-331-3p  | 52.5638 | 52.5663  | 37.7813 | 75.4835 |
| hsa-miR-331-5p  | 0.1     | 0.1      | 0.1     | 0.1     |
| hsa-miR-335-3p  | 0.1     | 0.913878 | 0.1     | 0.1     |
| hsa-miR-335-5p  | 3.70328 | 3.06401  | 2.10247 | 3.67026 |
| hsa-miR-337-3p  | 0.1     | 0.1      | 0.1     | 0.1     |
| hsa-miR-337-5p  | 0.1     | 0.1      | 0.1     | 0.1     |
| hsa-miR-338-3p  | 0.1     | 0.1      | 0.1     | 0.1     |
| hsa-miR-338-5p  | 0.1     | 0.1      | 0.1     | 0.1     |
| hsa-miR-339-3p  | 0.1     | 0.1      | 0.1     | 0.1     |
| hsa-miR-339-5p  | 0.1     | 0.1      | 0.1     | 0.1     |
| hsa-miR-33a-3p  | 0.1     | 0.1      | 0.1     | 0.1     |
| hsa-miR-33a-5p  | 0.1     | 0.1      | 0.1     | 0.1     |
| hsa-miR-33b-3p  | 0.1     | 0.1      | 0.1     | 0.1     |
| hsa-miR-33b-5p  | 0.1     | 0.1      | 0.1     | 0.1     |
| hsa-miR-340-3p  | 0.1     | 0.1      | 0.1     | 0.1     |
| hsa-miR-340-5p  | 5.4699  | 5.41993  | 0.1     | 5.09979 |
| hsa-miR-342-3p  | 8.5294  | 11.0283  | 10.4549 | 15.5051 |
| hsa-miR-342-5p  | 0.1     | 0.1      | 0.1     | 0.1     |
| hsa-miR-345-3p  | 0.1     | 0.1      | 0.1     | 0.1     |
| hsa-miR-345-5p  | 0.1     | 0.1      | 0.1     | 0.1     |
| hsa-miR-346     | 0.1     | 0.1      | 0.1     | 0.1     |
| hsa-miR-34a-3p  | 0.1     | 0.1      | 0.1     | 0.1     |
| hsa-miR-34a-5p  | 94.8349 | 76.9308  | 76.1134 | 100.228 |
| hsa-miR-34b-3p  | 0.1     | 0.1      | 0.1     | 0.1     |
| hsa-miR-34b-5p  | 9.89465 | 8.86202  | 10.4741 | 11.3499 |
| hsa-miR-34c-3p  | 0.1     | 0.1      | 0.1     | 0.1     |
| hsa-miR-34c-5p  | 0.1     | 0.1      | 0.1     | 0.1     |
| hsa-miR-3529-3p | 0.1     | 0.1      | 0.1     | 0.1     |
| hsa-miR-3529-5p | 0.1     | 0.1      | 0.1     | 0.1     |

|                  |         |         |         |         |
|------------------|---------|---------|---------|---------|
| hsa-miR-3591-3p  | 0.1     | 0.1     | 0.1     | 0.1     |
| hsa-miR-3591-5p  | 0.1     | 0.1     | 0.1     | 0.1     |
| hsa-miR-3605-3p  | 0.1     | 0.1     | 0.1     | 0.1     |
| hsa-miR-3605-5p  | 0.1     | 0.1     | 0.1     | 0.1     |
| hsa-miR-3606-3p  | 0.1     | 0.1     | 0.1     | 0.1     |
| hsa-miR-3606-5p  | 0.1     | 0.1     | 0.1     | 0.1     |
| hsa-miR-3607-3p  | 0.1     | 0.1     | 0.1     | 0.1     |
| hsa-miR-3607-5p  | 0.1     | 0.1     | 0.1     | 0.1     |
| hsa-miR-3609     | 0.1     | 0.1     | 0.1     | 0.1     |
| hsa-miR-3610     | 0.1     | 0.1     | 0.1     | 0.1     |
| hsa-miR-3611     | 0.1     | 0.1     | 0.1     | 0.1     |
| hsa-miR-3612     | 0.1     | 0.1     | 0.1     | 0.1     |
| hsa-miR-3613-3p  | 0.1     | 0.1     | 0.1     | 0.1     |
| hsa-miR-3613-5p  | 0.1     | 0.1     | 0.1     | 0.1     |
| hsa-miR-361-3p   | 3.35126 | 3.14447 | 3.20633 | 3.49586 |
| hsa-miR-3614-3p  | 0.1     | 0.1     | 0.1     | 0.1     |
| hsa-miR-3614-5p  | 0.1     | 0.1     | 0.1     | 0.1     |
| hsa-miR-3615     | 0.1     | 0.1     | 0.1     | 0.1     |
| hsa-miR-361-5p   | 13.3819 | 15.8911 | 10.8337 | 19.9574 |
| hsa-miR-3616-3p  | 0.1     | 0.1     | 0.1     | 0.1     |
| hsa-miR-3616-5p  | 0.1     | 0.1     | 0.1     | 0.1     |
| hsa-miR-3617-3p  | 0.1     | 0.1     | 0.1     | 0.1     |
| hsa-miR-3617-5p  | 0.1     | 0.1     | 0.1     | 0.1     |
| hsa-miR-3618     | 0.1     | 0.1     | 0.1     | 0.1     |
| hsa-miR-3619-3p  | 0.1     | 0.1     | 0.1     | 0.1     |
| hsa-miR-3619-5p  | 0.1     | 0.1     | 0.1     | 0.1     |
| hsa-miR-3620-3p  | 0.1     | 0.1     | 0.1     | 0.1     |
| hsa-miR-3620-5p  | 0.1     | 0.1     | 0.1     | 0.1     |
| hsa-miR-3621     | 0.1     | 0.1     | 0.1     | 0.1     |
| hsa-miR-3622a-3p | 0.1     | 0.1     | 0.1     | 0.1     |
| hsa-miR-3622a-5p | 0.1     | 0.1     | 0.1     | 0.1     |
| hsa-miR-3622b-3p | 0.1     | 0.1     | 0.1     | 0.1     |
| hsa-miR-3622b-5p | 0.1     | 0.1     | 0.1     | 0.1     |
| hsa-miR-362-3p   | 2.05352 | 2.03239 | 0.1     | 2.32749 |
| hsa-miR-362-5p   | 0.1     | 0.1     | 0.1     | 0.1     |
| hsa-miR-363-3p   | 0.1     | 0.1     | 0.1     | 0.1     |
| hsa-miR-363-5p   | 0.1     | 0.1     | 0.1     | 0.1     |
| hsa-miR-3646     | 0.1     | 0.1     | 0.1     | 0.1     |
| hsa-miR-3648     | 0.1     | 0.1     | 0.1     | 0.1     |
| hsa-miR-3649     | 0.1     | 0.1     | 0.1     | 0.1     |
| hsa-miR-3650     | 0.1     | 0.1     | 0.1     | 0.1     |
| hsa-miR-3651     | 70.0739 | 57.5453 | 64.5748 | 43.0988 |
| hsa-miR-3652     | 0.1     | 0.1     | 0.1     | 0.1     |
| hsa-miR-3653-3p  | 2.19451 | 2.01258 | 2.95611 | 2.21713 |
| hsa-miR-3653-5p  | 0.1     | 0.1     | 0.1     | 0.1     |
| hsa-miR-3654     | 0.1     | 0.1     | 0.1     | 0.1     |
| hsa-miR-3655     | 0.1     | 0.1     | 0.1     | 0.1     |
| hsa-miR-3656     | 17.902  | 14.5406 | 27.2417 | 10.2191 |
| hsa-miR-3657     | 0.1     | 0.1     | 0.1     | 0.1     |
| hsa-miR-3658     | 0.1     | 0.1     | 0.1     | 0.1     |
| hsa-miR-3659     | 0.1     | 0.1     | 0.1     | 5.64393 |
| hsa-miR-365a-3p  | 227.258 | 406.225 | 208.617 | 418.263 |
| hsa-miR-365a-5p  | 0.1     | 0.1     | 0.1     | 0.1     |



|                  |         |         |         |         |
|------------------|---------|---------|---------|---------|
| hsa-miR-365b-5p  | 0.1     | 0.1     | 0.1     | 0.1     |
| hsa-miR-3660     | 0.1     | 0.1     | 0.1     | 0.1     |
| hsa-miR-3661     | 0.1     | 0.1     | 0.1     | 0.1     |
| hsa-miR-3662     | 0.1     | 0.1     | 0.1     | 0.1     |
| hsa-miR-3663-3p  | 0.1     | 2.12658 | 0.1     | 0.1     |
| hsa-miR-3663-5p  | 0.1     | 0.1     | 0.1     | 0.1     |
| hsa-miR-3664-3p  | 0.1     | 0.1     | 0.1     | 0.1     |
| hsa-miR-3664-5p  | 0.1     | 0.1     | 0.1     | 0.1     |
| hsa-miR-3665     | 38.6992 | 42.3608 | 41.8024 | 36.9247 |
| hsa-miR-3666     | 0.1     | 0.1     | 0.1     | 0.1     |
| hsa-miR-3667-3p  | 0.1     | 0.1     | 0.1     | 0.1     |
| hsa-miR-3667-5p  | 0.1     | 0.1     | 0.1     | 0.1     |
| hsa-miR-3668     | 0.1     | 0.1     | 0.1     | 0.1     |
| hsa-miR-3670     | 0.1     | 0.1     | 0.1     | 0.1     |
| hsa-miR-3671     | 0.1     | 0.1     | 0.1     | 0.1     |
| hsa-miR-3672     | 0.1     | 0.1     | 0.1     | 0.1     |
| hsa-miR-367-3p   | 0.1     | 0.1     | 0.1     | 0.1     |
| hsa-miR-3674     | 0.1     | 0.1     | 0.1     | 0.1     |
| hsa-miR-3675-3p  | 0.1     | 0.1     | 0.1     | 0.1     |
| hsa-miR-3675-5p  | 0.1     | 0.1     | 0.1     | 0.1     |
| hsa-miR-367-5p   | 0.1     | 0.1     | 0.1     | 0.1     |
| hsa-miR-3677-3p  | 0.1     | 0.1     | 0.1     | 0.1     |
| hsa-miR-3677-5p  | 0.1     | 0.1     | 0.1     | 0.1     |
| hsa-miR-3678-3p  | 0.1     | 0.1     | 0.1     | 0.1     |
| hsa-miR-3678-5p  | 0.1     | 0.1     | 0.1     | 0.1     |
| hsa-miR-3679-3p  | 0.1     | 0.1     | 0.1     | 0.1     |
| hsa-miR-3679-5p  | 12.6905 | 15.5699 | 17.7593 | 11.1812 |
| hsa-miR-3680-3p  | 0.1     | 0.1     | 0.1     | 0.1     |
| hsa-miR-3680-5p  | 0.1     | 0.1     | 0.1     | 0.1     |
| hsa-miR-3681-3p  | 0.1     | 0.1     | 0.1     | 0.1     |
| hsa-miR-3681-5p  | 0.1     | 0.1     | 0.1     | 0.1     |
| hsa-miR-3682-3p  | 0.1     | 0.1     | 0.1     | 0.1     |
| hsa-miR-3682-5p  | 0.1     | 0.1     | 0.1     | 0.1     |
| hsa-miR-3683     | 0.1     | 0.1     | 0.1     | 0.1     |
| hsa-miR-3684     | 0.1     | 0.1     | 0.1     | 0.1     |
| hsa-miR-3685     | 0.1     | 0.1     | 0.1     | 0.1     |
| hsa-miR-3686     | 0.1     | 0.1     | 0.1     | 0.1     |
| hsa-miR-3687     | 0.1     | 0.1     | 0.1     | 0.1     |
| hsa-miR-3688-3p  | 0.1     | 0.1     | 0.1     | 0.1     |
| hsa-miR-3688-5p  | 0.1     | 0.1     | 0.1     | 0.1     |
| hsa-miR-3689a-3p | 0.1     | 0.1     | 0.1     | 0.1     |
| hsa-miR-3689a-5p | 0.1     | 0.1     | 0.1     | 0.1     |
| hsa-miR-3689b-3p | 0.1     | 0.1     | 0.1     | 0.1     |
| hsa-miR-3689d    | 0.1     | 0.1     | 0.1     | 0.1     |
| hsa-miR-3689f    | 0.1     | 0.1     | 0.1     | 0.1     |
| hsa-miR-3690     | 0.1     | 0.1     | 0.1     | 0.1     |
| hsa-miR-3691-3p  | 0.1     | 0.1     | 0.1     | 0.1     |
| hsa-miR-3691-5p  | 0.1     | 0.1     | 0.1     | 0.1     |
| hsa-miR-3692-3p  | 0.1     | 0.1     | 0.1     | 0.1     |
| hsa-miR-3692-5p  | 0.1     | 0.1     | 0.1     | 0.1     |
| hsa-miR-369-3p   | 0.1     | 0.1     | 0.1     | 0.1     |
| hsa-miR-369-5p   | 0.1     | 0.1     | 0.1     | 0.1     |
| hsa-miR-370-3p   | 0.1     | 0.1     | 0.1     | 0.1     |

|                   |         |         |         |         |
|-------------------|---------|---------|---------|---------|
| hsa-miR-370-5p    | 0.1     | 0.1     | 0.1     | 0.1     |
| hsa-miR-3713      | 0.1     | 0.1     | 0.1     | 0.1     |
| hsa-miR-3714      | 0.1     | 0.1     | 0.1     | 0.1     |
| hsa-miR-371a-3p   | 0.1     | 0.1     | 0.1     | 0.1     |
| hsa-miR-371a-5p   | 0.1     | 0.1     | 1.64944 | 0.1     |
| hsa-miR-371b-3p   | 0.1     | 0.1     | 0.1     | 0.1     |
| hsa-miR-371b-5p   | 8.98138 | 9.43944 | 11.3711 | 6.71807 |
| hsa-miR-372-3p    | 0.1     | 0.1     | 0.1     | 0.1     |
| hsa-miR-372-5p    | 0.1     | 0.1     | 0.1     | 0.1     |
| hsa-miR-373-3p    | 0.1     | 0.1     | 0.1     | 0.1     |
| hsa-miR-373-5p    | 0.1     | 0.1     | 0.1     | 0.1     |
| hsa-miR-374a-3p   | 0.1     | 0.1     | 0.1     | 0.1     |
| hsa-miR-374a-5p   | 61.6494 | 51.9437 | 26.2731 | 64.0069 |
| hsa-miR-374b-3p   | 0.1     | 0.1     | 0.1     | 0.1     |
| hsa-miR-374b-5p   | 38.4599 | 29.1973 | 20.0881 | 33.1315 |
| hsa-miR-374c-3p   | 0.1     | 0.1     | 0.1     | 0.1     |
| hsa-miR-374c-5p   | 2.35816 | 0.1     | 0.1     | 1.92013 |
| hsa-miR-375       | 0.1     | 0.1     | 0.1     | 0.1     |
| hsa-miR-376a-2-5p | 0.1     | 0.1     | 0.1     | 0.1     |
| hsa-miR-376a-3p   | 0.1     | 6.10518 | 0.1     | 6.14501 |
| hsa-miR-376a-5p   | 0.1     | 0.1     | 0.1     | 0.1     |
| hsa-miR-376b-3p   | 0.1     | 0.1     | 0.1     | 0.1     |
| hsa-miR-376b-5p   | 0.1     | 0.1     | 0.1     | 0.1     |
| hsa-miR-376c-3p   | 0.1     | 10.5898 | 0.1     | 10.0266 |
| hsa-miR-376c-5p   | 0.1     | 0.1     | 0.1     | 0.1     |
| hsa-miR-377-3p    | 0.1     | 2.19544 | 0.1     | 2.19456 |
| hsa-miR-377-5p    | 0.1     | 0.1     | 0.1     | 0.1     |
| hsa-miR-378a-3p   | 13.0882 | 9.32206 | 8.33059 | 9.40629 |
| hsa-miR-378a-5p   | 0.1     | 0.1     | 0.1     | 0.1     |
| hsa-miR-378b      | 0.1     | 0.1     | 0.1     | 0.1     |
| hsa-miR-378c      | 0.1     | 0.1     | 0.1     | 0.1     |
| hsa-miR-378d      | 0.1     | 0.1     | 0.1     | 0.1     |
| hsa-miR-378e      | 0.1     | 0.1     | 0.1     | 0.1     |
| hsa-miR-378f      | 0.1     | 0.1     | 0.1     | 0.1     |
| hsa-miR-378g      | 0.1     | 0.1     | 0.1     | 0.1     |
| hsa-miR-378h      | 0.1     | 0.1     | 0.1     | 0.1     |
| hsa-miR-378i      | 15.098  | 10.7167 | 8.83609 | 11.9064 |
| hsa-miR-378j      | 0.1     | 0.1     | 0.1     | 0.1     |
| hsa-miR-379-3p    | 0.1     | 0.1     | 0.1     | 0.1     |
| hsa-miR-379-5p    | 0.1     | 0.1     | 0.1     | 0.1     |
| hsa-miR-380-3p    | 0.1     | 0.1     | 0.1     | 0.1     |
| hsa-miR-380-5p    | 0.1     | 0.1     | 0.1     | 0.1     |
| hsa-miR-381-3p    | 0.1     | 2.31903 | 0.1     | 0.1     |
| hsa-miR-381-5p    | 0.1     | 0.1     | 0.1     | 0.1     |
| hsa-miR-382-3p    | 0.1     | 0.1     | 0.1     | 0.1     |
| hsa-miR-382-5p    | 0.1     | 0.1     | 0.1     | 0.1     |
| hsa-miR-383-3p    | 0.1     | 0.1     | 0.1     | 0.1     |
| hsa-miR-383-5p    | 0.1     | 0.1     | 0.1     | 0.1     |
| hsa-miR-384       | 0.1     | 0.1     | 0.1     | 0.1     |
| hsa-miR-3907      | 0.1     | 0.1     | 0.1     | 0.1     |
| hsa-miR-3908      | 0.1     | 0.1     | 0.1     | 0.1     |
| hsa-miR-3909      | 0.1     | 0.1     | 0.1     | 0.1     |
| hsa-miR-3910      | 0.1     | 0.1     | 0.1     | 0.1     |

|                 |         |         |         |         |
|-----------------|---------|---------|---------|---------|
| hsa-miR-3911    | 0.1     | 0.1     | 0.1     | 0.1     |
| hsa-miR-3912-3p | 0.1     | 0.1     | 0.1     | 0.1     |
| hsa-miR-3912-5p | 0.1     | 0.1     | 0.1     | 0.1     |
| hsa-miR-3913-3p | 0.1     | 0.1     | 0.1     | 0.1     |
| hsa-miR-3913-5p | 0.1     | 0.1     | 0.1     | 0.1     |
| hsa-miR-3914    | 0.1     | 0.1     | 0.1     | 0.1     |
| hsa-miR-3915    | 0.1     | 0.1     | 0.1     | 0.1     |
| hsa-miR-3916    | 0.1     | 0.1     | 0.1     | 0.1     |
| hsa-miR-3917    | 0.1     | 0.1     | 0.1     | 0.1     |
| hsa-miR-3918    | 0.1     | 0.1     | 0.1     | 0.1     |
| hsa-miR-3919    | 0.1     | 0.1     | 0.1     | 0.1     |
| hsa-miR-3920    | 0.1     | 0.1     | 0.1     | 0.1     |
| hsa-miR-3921    | 0.1     | 0.1     | 0.1     | 0.1     |
| hsa-miR-3922-3p | 0.1     | 0.1     | 0.1     | 0.1     |
| hsa-miR-3922-5p | 0.1     | 0.1     | 0.1     | 0.1     |
| hsa-miR-3923    | 0.1     | 0.1     | 0.1     | 0.1     |
| hsa-miR-3924    | 0.1     | 0.1     | 0.1     | 0.1     |
| hsa-miR-3925-3p | 0.1     | 0.1     | 0.1     | 0.1     |
| hsa-miR-3925-5p | 0.1     | 0.1     | 0.1     | 0.1     |
| hsa-miR-3926    | 0.1     | 0.1     | 0.1     | 0.1     |
| hsa-miR-3927-3p | 0.1     | 0.1     | 0.1     | 0.1     |
| hsa-miR-3927-5p | 0.1     | 0.1     | 0.1     | 0.1     |
| hsa-miR-3928-3p | 0.1     | 0.1     | 0.1     | 0.1     |
| hsa-miR-3928-5p | 0.1     | 0.1     | 0.1     | 0.1     |
| hsa-miR-3929    | 0.1     | 0.1     | 0.1     | 0.1     |
| hsa-miR-3934-3p | 0.1     | 0.1     | 0.1     | 0.1     |
| hsa-miR-3934-5p | 18.4179 | 32.7369 | 122.327 | 24.3436 |
| hsa-miR-3935    | 0.1     | 0.1     | 0.1     | 0.1     |
| hsa-miR-3936    | 0.1     | 0.1     | 0.1     | 0.1     |
| hsa-miR-3937    | 0.1     | 0.1     | 0.1     | 0.1     |
| hsa-miR-3938    | 0.1     | 0.1     | 0.1     | 0.1     |
| hsa-miR-3939    | 0.1     | 0.1     | 0.1     | 0.1     |
| hsa-miR-3940-3p | 0.1     | 0.1     | 0.1     | 0.1     |
| hsa-miR-3940-5p | 4.15948 | 4.39773 | 5.26132 | 2.75453 |
| hsa-miR-3941    | 0.1     | 0.1     | 0.1     | 0.1     |
| hsa-miR-3942-3p | 0.1     | 0.1     | 0.1     | 0.1     |
| hsa-miR-3942-5p | 0.1     | 0.1     | 0.1     | 0.1     |
| hsa-miR-3943    | 0.1     | 0.1     | 0.1     | 0.1     |
| hsa-miR-3944-3p | 0.1     | 0.1     | 0.1     | 0.1     |
| hsa-miR-3944-5p | 0.1     | 0.1     | 0.1     | 0.1     |
| hsa-miR-3945    | 0.1     | 0.1     | 0.1     | 0.1     |
| hsa-miR-3960    | 75.7907 | 74.3314 | 89.5175 | 48.7852 |
| hsa-miR-3972    | 0.1     | 0.1     | 0.1     | 0.1     |
| hsa-miR-3973    | 0.1     | 0.1     | 0.1     | 0.1     |
| hsa-miR-3974    | 0.1     | 0.1     | 0.1     | 0.1     |
| hsa-miR-3975    | 0.1     | 0.1     | 0.1     | 0.1     |
| hsa-miR-3976    | 0.1     | 0.1     | 0.1     | 0.1     |
| hsa-miR-3977    | 0.1     | 0.1     | 0.1     | 0.1     |
| hsa-miR-3978    | 0.1     | 0.1     | 0.1     | 0.1     |
| hsa-miR-409-3p  | 0.1     | 0.1     | 0.1     | 0.1     |
| hsa-miR-409-5p  | 0.1     | 0.1     | 0.1     | 0.1     |
| hsa-miR-410-3p  | 0.1     | 0.1     | 0.1     | 0.1     |
| hsa-miR-410-5p  | 0.1     | 0.1     | 0.1     | 0.1     |

|                |         |         |         |         |
|----------------|---------|---------|---------|---------|
| hsa-miR-411-3p | 0.1     | 0.1     | 0.1     | 0.1     |
| hsa-miR-411-5p | 0.1     | 0.1     | 0.1     | 0.1     |
| hsa-miR-412-3p | 0.1     | 0.1     | 0.1     | 0.1     |
| hsa-miR-412-5p | 0.1     | 0.1     | 0.1     | 0.1     |
| hsa-miR-421    | 1.55814 | 0.1     | 0.1     | 0.1     |
| hsa-miR-422a   | 0.1     | 0.1     | 0.1     | 0.1     |
| hsa-miR-423-3p | 0.1     | 0.1     | 0.1     | 0.1     |
| hsa-miR-423-5p | 11.4304 | 9.74081 | 9.83569 | 10.3305 |
| hsa-miR-424-3p | 0.1     | 1.81764 | 0.1     | 0.1     |
| hsa-miR-424-5p | 119.569 | 380.303 | 79.8575 | 386.722 |
| hsa-miR-4251   | 0.1     | 0.1     | 0.1     | 0.1     |
| hsa-miR-4252   | 0.1     | 0.1     | 0.1     | 0.1     |
| hsa-miR-4253   | 0.1     | 0.1     | 0.1     | 0.1     |
| hsa-miR-425-3p | 0.1     | 0.1     | 0.1     | 0.1     |
| hsa-miR-4254   | 0.1     | 0.1     | 0.1     | 0.1     |
| hsa-miR-4255   | 0.1     | 0.1     | 0.1     | 0.1     |
| hsa-miR-425-5p | 18.3279 | 14.1208 | 17.215  | 13.3263 |
| hsa-miR-4256   | 0.1     | 0.1     | 0.1     | 0.1     |
| hsa-miR-4257   | 2.28618 | 3.0121  | 6.09394 | 1.89408 |
| hsa-miR-4258   | 0.1     | 0.1     | 0.1     | 0.1     |
| hsa-miR-4259   | 0.1     | 0.1     | 0.1     | 0.1     |
| hsa-miR-4260   | 0.1     | 0.1     | 0.1     | 0.1     |
| hsa-miR-4261   | 0.1     | 0.1     | 0.1     | 0.1     |
| hsa-miR-4262   | 0.1     | 0.1     | 0.1     | 0.1     |
| hsa-miR-4263   | 0.1     | 0.1     | 0.1     | 0.1     |
| hsa-miR-4264   | 0.1     | 0.1     | 0.1     | 0.1     |
| hsa-miR-4265   | 0.1     | 0.1     | 0.1     | 0.1     |
| hsa-miR-4266   | 0.1     | 0.1     | 0.1     | 0.1     |
| hsa-miR-4267   | 0.1     | 0.1     | 0.1     | 0.1     |
| hsa-miR-4268   | 0.1     | 0.1     | 0.1     | 0.1     |
| hsa-miR-4269   | 0.1     | 0.1     | 0.1     | 0.1     |
| hsa-miR-4270   | 0.1     | 0.1     | 1.92804 | 0.1     |
| hsa-miR-4271   | 1.49888 | 0.1     | 4.718   | 0.1     |
| hsa-miR-4272   | 0.1     | 0.1     | 0.1     | 0.1     |
| hsa-miR-4273   | 0.1     | 0.1     | 0.1     | 0.1     |
| hsa-miR-4274   | 0.1     | 0.1     | 0.1     | 0.1     |
| hsa-miR-4275   | 0.1     | 0.1     | 0.1     | 0.1     |
| hsa-miR-4276   | 0.1     | 0.1     | 0.1     | 0.1     |
| hsa-miR-4277   | 0.1     | 0.1     | 0.1     | 0.1     |
| hsa-miR-4278   | 0.1     | 0.1     | 0.1     | 0.1     |
| hsa-miR-4279   | 0.1     | 0.1     | 0.1     | 0.1     |
| hsa-miR-4280   | 0.1     | 0.1     | 0.1     | 0.1     |
| hsa-miR-4281   | 28.0075 | 30.086  | 31.1567 | 22.4809 |
| hsa-miR-4282   | 0.1     | 0.1     | 0.1     | 0.1     |
| hsa-miR-4283   | 0.1     | 0.1     | 0.1     | 0.1     |
| hsa-miR-4284   | 1391.55 | 1054.89 | 980.697 | 1423.15 |
| hsa-miR-4285   | 0.1     | 0.1     | 0.1     | 0.1     |
| hsa-miR-4286   | 41.4902 | 124.566 | 40.3273 | 174.868 |
| hsa-miR-4287   | 0.1     | 0.1     | 0.1     | 0.1     |
| hsa-miR-4288   | 0.1     | 0.1     | 0.1     | 0.1     |
| hsa-miR-4289   | 0.1     | 0.1     | 0.1     | 0.1     |
| hsa-miR-429    | 0.1     | 0.1     | 0.1     | 0.1     |
| hsa-miR-4290   | 0.1     | 0.1     | 0.1     | 0.1     |

|                |         |         |         |         |
|----------------|---------|---------|---------|---------|
| hsa-miR-4291   | 12.124  | 18.0644 | 10.5848 | 22.5631 |
| hsa-miR-4292   | 0.1     | 0.1     | 0.1     | 0.1     |
| hsa-miR-4293   | 0.1     | 0.1     | 0.1     | 0.1     |
| hsa-miR-4294   | 0.1     | 0.1     | 0.1     | 0.1     |
| hsa-miR-4295   | 0.1     | 0.1     | 0.1     | 0.1     |
| hsa-miR-4296   | 0.1     | 0.1     | 0.1     | 0.1     |
| hsa-miR-4297   | 0.1     | 0.1     | 0.1     | 0.1     |
| hsa-miR-4298   | 1.69193 | 1.89246 | 9.34329 | 0.1     |
| hsa-miR-4299   | 72.912  | 82.2657 | 85.9139 | 70.5878 |
| hsa-miR-4300   | 0.1     | 0.1     | 0.1     | 0.1     |
| hsa-miR-4301   | 0.1     | 0.1     | 0.1     | 0.1     |
| hsa-miR-4302   | 0.1     | 0.1     | 0.1     | 0.1     |
| hsa-miR-4303   | 0.1     | 0.1     | 0.1     | 0.1     |
| hsa-miR-4304   | 0.1     | 0.1     | 0.1     | 0.1     |
| hsa-miR-4305   | 0.1     | 0.1     | 0.1     | 0.1     |
| hsa-miR-4306   | 11.9103 | 12.4708 | 11.8134 | 17.3069 |
| hsa-miR-4307   | 0.1     | 0.1     | 0.1     | 0.1     |
| hsa-miR-4308   | 0.1     | 0.1     | 0.1     | 0.1     |
| hsa-miR-4309   | 0.1     | 0.1     | 0.1     | 0.1     |
| hsa-miR-4310   | 0.1     | 0.1     | 0.1     | 0.1     |
| hsa-miR-4311   | 0.1     | 0.1     | 0.1     | 0.1     |
| hsa-miR-4312   | 0.1     | 0.1     | 0.1     | 0.1     |
| hsa-miR-4313   | 0.1     | 0.1     | 0.1     | 0.1     |
| hsa-miR-431-3p | 0.1     | 0.1     | 0.1     | 0.1     |
| hsa-miR-4314   | 0.1     | 0.1     | 0.1     | 0.1     |
| hsa-miR-4315   | 0.1     | 0.1     | 0.1     | 0.1     |
| hsa-miR-431-5p | 0.1     | 0.1     | 0.1     | 0.1     |
| hsa-miR-4316   | 0.1     | 0.1     | 0.1     | 0.1     |
| hsa-miR-4317   | 0.1     | 2.74384 | 0.1     | 3.17479 |
| hsa-miR-4318   | 0.1     | 0.1     | 0.1     | 0.1     |
| hsa-miR-4319   | 0.1     | 0.1     | 0.1     | 0.1     |
| hsa-miR-4320   | 0.1     | 0.1     | 0.1     | 0.1     |
| hsa-miR-4321   | 0.1     | 0.1     | 0.1     | 0.1     |
| hsa-miR-4322   | 0.1     | 0.1     | 0.1     | 0.1     |
| hsa-miR-4323   | 0.1     | 0.1     | 0.1     | 0.1     |
| hsa-miR-432-3p | 0.1     | 0.1     | 0.1     | 0.1     |
| hsa-miR-4324   | 1.19649 | 1.96567 | 1.3843  | 2.73288 |
| hsa-miR-4325   | 0.1     | 0.1     | 0.1     | 0.1     |
| hsa-miR-432-5p | 0.1     | 0.1     | 0.1     | 0.1     |
| hsa-miR-4326   | 0.1     | 0.1     | 0.1     | 0.1     |
| hsa-miR-4327   | 0.1     | 0.1     | 0.1     | 0.1     |
| hsa-miR-4328   | 0.1     | 0.1     | 0.1     | 0.1     |
| hsa-miR-4329   | 0.1     | 0.1     | 0.1     | 0.1     |
| hsa-miR-4330   | 0.1     | 0.1     | 0.1     | 0.1     |
| hsa-miR-433-3p | 0.1     | 0.1     | 0.1     | 0.1     |
| hsa-miR-433-5p | 0.1     | 0.1     | 0.1     | 0.1     |
| hsa-miR-4417   | 0.1     | 0.1     | 0.1     | 0.1     |
| hsa-miR-4418   | 0.1     | 0.1     | 0.1     | 0.1     |
| hsa-miR-4419a  | 0.1     | 0.1     | 0.1     | 0.1     |
| hsa-miR-4419b  | 0.1     | 0.1     | 0.1     | 0.1     |
| hsa-miR-4420   | 0.1     | 0.1     | 0.1     | 0.1     |
| hsa-miR-4421   | 0.1     | 0.1     | 0.1     | 0.1     |
| hsa-miR-4422   | 0.1     | 0.1     | 0.1     | 0.1     |

|                  |         |         |         |         |
|------------------|---------|---------|---------|---------|
| hsa-miR-4423-3p  | 0.1     | 0.1     | 0.1     | 0.1     |
| hsa-miR-4423-5p  | 0.1     | 0.1     | 0.1     | 0.1     |
| hsa-miR-4424     | 0.1     | 0.1     | 0.1     | 0.1     |
| hsa-miR-4425     | 0.1     | 0.1     | 0.1     | 0.1     |
| hsa-miR-4426     | 0.1     | 0.1     | 0.1     | 0.1     |
| hsa-miR-4427     | 0.1     | 0.1     | 0.1     | 0.1     |
| hsa-miR-4428     | 16.9306 | 18.717  | 12.4728 | 15.3476 |
| hsa-miR-4429     | 0.1     | 0.1     | 0.1     | 0.1     |
| hsa-miR-4430     | 43.9213 | 43.7606 | 98.0802 | 31.4364 |
| hsa-miR-4431     | 0.1     | 0.1     | 0.1     | 0.1     |
| hsa-miR-4432     | 0.1     | 0.1     | 0.1     | 0.1     |
| hsa-miR-4433a-3p | 0.1     | 0.1     | 0.1     | 0.1     |
| hsa-miR-4433a-5p | 0.1     | 0.1     | 0.1     | 0.1     |
| hsa-miR-4433b-3p | 0.1     | 0.1     | 0.1     | 0.1     |
| hsa-miR-4434     | 0.1     | 0.1     | 0.1     | 0.1     |
| hsa-miR-4435     | 0.1     | 0.1     | 0.1     | 0.1     |
| hsa-miR-4436a    | 0.1     | 0.1     | 0.1     | 0.1     |
| hsa-miR-4436b-3p | 0.1     | 0.1     | 0.1     | 0.1     |
| hsa-miR-4436b-5p | 0.1     | 0.1     | 0.1     | 0.1     |
| hsa-miR-4437     | 0.1     | 0.1     | 0.1     | 0.1     |
| hsa-miR-4438     | 0.1     | 0.1     | 0.1     | 0.1     |
| hsa-miR-4439     | 0.1     | 0.1     | 0.1     | 0.1     |
| hsa-miR-4440     | 0.1     | 0.1     | 0.1     | 0.1     |
| hsa-miR-4441     | 0.1     | 0.1     | 0.1     | 0.1     |
| hsa-miR-4442     | 7.11919 | 7.13877 | 9.97065 | 6.41275 |
| hsa-miR-4443     | 15.0602 | 18.4468 | 21.1287 | 16.3111 |
| hsa-miR-4444     | 0.1     | 0.1     | 0.1     | 0.1     |
| hsa-miR-4445-3p  | 0.1     | 0.1     | 0.1     | 0.1     |
| hsa-miR-4445-5p  | 0.1     | 0.1     | 0.1     | 0.1     |
| hsa-miR-4446-3p  | 0.1     | 0.1     | 0.1     | 0.1     |
| hsa-miR-4446-5p  | 0.1     | 0.1     | 0.1     | 0.1     |
| hsa-miR-4447     | 0.1     | 0.1     | 0.1     | 0.1     |
| hsa-miR-4448     | 0.1     | 0.1     | 0.1     | 0.1     |
| hsa-miR-4449     | 0.1     | 0.1     | 0.1     | 0.1     |
| hsa-miR-4450     | 0.1     | 0.1     | 0.1     | 0.1     |
| hsa-miR-4451     | 0.1     | 0.1     | 0.1     | 0.1     |
| hsa-miR-4452     | 0.1     | 0.1     | 0.1     | 0.1     |
| hsa-miR-4453     | 0.1     | 0.1     | 0.1     | 0.1     |
| hsa-miR-4455     | 0.1     | 0.1     | 0.1     | 0.1     |
| hsa-miR-4456     | 0.1     | 0.1     | 0.1     | 0.1     |
| hsa-miR-4457     | 0.1     | 0.1     | 0.1     | 0.1     |
| hsa-miR-4458     | 0.1     | 0.1     | 0.1     | 0.1     |
| hsa-miR-4459     | 150.195 | 172.802 | 177.343 | 148.599 |
| hsa-miR-4460     | 0.1     | 0.1     | 0.1     | 0.1     |
| hsa-miR-4461     | 0.1     | 0.1     | 0.1     | 0.1     |
| hsa-miR-4462     | 0.1     | 0.1     | 0.1     | 0.1     |
| hsa-miR-4463     | 1.66454 | 0.1     | 3.90919 | 0.1     |
| hsa-miR-4464     | 0.1     | 0.1     | 0.1     | 0.1     |
| hsa-miR-4465     | 26.7508 | 19.2959 | 20.0145 | 14.3408 |
| hsa-miR-4466     | 22.2948 | 20.8094 | 25.3445 | 14.1869 |
| hsa-miR-4467     | 0.1     | 0.1     | 0.1     | 0.1     |
| hsa-miR-4468     | 0.1     | 0.1     | 0.1     | 0.1     |
| hsa-miR-4469     | 0.1     | 0.1     | 0.1     | 0.1     |

|                   |         |         |         |         |
|-------------------|---------|---------|---------|---------|
| hsa-miR-4470      | 0.1     | 0.1     | 0.1     | 0.1     |
| hsa-miR-4471      | 0.1     | 0.1     | 0.1     | 0.1     |
| hsa-miR-4472      | 0.1     | 0.1     | 0.1     | 0.1     |
| hsa-miR-4473      | 0.1     | 0.1     | 0.1     | 0.1     |
| hsa-miR-4474-3p   | 0.1     | 0.1     | 0.1     | 0.1     |
| hsa-miR-4474-5p   | 0.1     | 0.1     | 0.1     | 0.1     |
| hsa-miR-4475      | 0.1     | 0.1     | 0.1     | 0.1     |
| hsa-miR-4476      | 0.1     | 0.1     | 0.1     | 0.1     |
| hsa-miR-4477a     | 0.1     | 0.1     | 0.1     | 0.1     |
| hsa-miR-4477b     | 0.1     | 0.1     | 0.1     | 0.1     |
| hsa-miR-4478      | 8.99148 | 8.22828 | 10.2622 | 7.07031 |
| hsa-miR-4479      | 0.1     | 0.1     | 0.1     | 0.1     |
| hsa-miR-448       | 0.1     | 0.1     | 0.1     | 0.1     |
| hsa-miR-4480      | 0.1     | 0.1     | 0.1     | 0.1     |
| hsa-miR-4481      | 0.1     | 0.1     | 0.1     | 0.1     |
| hsa-miR-4482-3p   | 0.1     | 0.1     | 0.1     | 0.1     |
| hsa-miR-4482-5p   | 0.1     | 0.1     | 0.1     | 0.1     |
| hsa-miR-4483      | 0.1     | 0.1     | 0.1     | 0.1     |
| hsa-miR-4484      | 0.1     | 0.1     | 0.1     | 0.1     |
| hsa-miR-4485-3p   | 15.4342 | 12.1622 | 19.6751 | 11.925  |
| hsa-miR-4485-5p   | 120.323 | 98.9308 | 204.732 | 109.524 |
| hsa-miR-4486      | 0.1     | 0.1     | 0.1     | 0.1     |
| hsa-miR-4487      | 0.1     | 0.1     | 2.50005 | 0.1     |
| hsa-miR-4488      | 0.1     | 0.1     | 2.43947 | 0.1     |
| hsa-miR-4489      | 0.1     | 0.1     | 0.1     | 0.1     |
| hsa-miR-4490      | 0.1     | 0.1     | 0.1     | 0.1     |
| hsa-miR-4491      | 0.1     | 0.1     | 0.1     | 0.1     |
| hsa-miR-4492      | 0.1     | 0.1     | 0.1     | 0.1     |
| hsa-miR-4493      | 0.1     | 0.1     | 0.1     | 0.1     |
| hsa-miR-4494      | 0.1     | 0.1     | 0.1     | 0.1     |
| hsa-miR-4495      | 0.1     | 0.1     | 0.1     | 0.1     |
| hsa-miR-4496      | 0.1     | 0.1     | 0.1     | 0.1     |
| hsa-miR-4497      | 11.1596 | 11.6245 | 10.408  | 9.8214  |
| hsa-miR-4498      | 0.1     | 0.1     | 0.1     | 0.1     |
| hsa-miR-4499      | 7.71996 | 5.68889 | 6.15204 | 3.90669 |
| hsa-miR-449a      | 0.1     | 0.1     | 0.1     | 0.1     |
| hsa-miR-449b-3p   | 0.1     | 0.1     | 0.1     | 0.1     |
| hsa-miR-449b-5p   | 0.1     | 0.1     | 0.1     | 0.1     |
| hsa-miR-449c-3p   | 0.1     | 0.1     | 0.1     | 0.1     |
| hsa-miR-449c-5p   | 0.1     | 0.1     | 0.1     | 0.1     |
| hsa-miR-4500      | 0.1     | 0.1     | 0.1     | 0.1     |
| hsa-miR-4501      | 0.1     | 0.1     | 0.1     | 0.1     |
| hsa-miR-4502      | 0.1     | 0.1     | 0.1     | 0.1     |
| hsa-miR-4503      | 0.1     | 0.1     | 0.1     | 0.1     |
| hsa-miR-4504      | 0.1     | 0.1     | 0.1     | 0.1     |
| hsa-miR-4505      | 45.2324 | 48.0455 | 51.56   | 40.2529 |
| hsa-miR-4506      | 0.1     | 0.1     | 0.1     | 0.1     |
| hsa-miR-4507      | 39.8543 | 40.2202 | 45.932  | 35.8981 |
| hsa-miR-4508      | 0.1     | 0.1     | 0.1     | 0.1     |
| hsa-miR-4509      | 0.1     | 0.1     | 0.1     | 0.1     |
| hsa-miR-450a-1-3p | 0.1     | 0.1     | 0.1     | 0.1     |
| hsa-miR-450a-2-3p | 0.1     | 0.1     | 0.1     | 0.1     |
| hsa-miR-450a-5p   | 6.98493 | 11.19   | 5.12409 | 17.4655 |

|                   |         |         |         |         |
|-------------------|---------|---------|---------|---------|
| hsa-miR-450b-3p   | 0.1     | 0.1     | 0.1     | 0.1     |
| hsa-miR-450b-5p   | 0.1     | 0.1     | 0.1     | 0.1     |
| hsa-miR-4510      | 0.1     | 0.1     | 0.1     | 0.1     |
| hsa-miR-4511      | 0.1     | 0.1     | 0.1     | 0.1     |
| hsa-miR-4512      | 0.1     | 0.1     | 0.1     | 0.1     |
| hsa-miR-4513      | 0.1     | 0.1     | 0.1     | 0.1     |
| hsa-miR-4514      | 0.1     | 0.1     | 0.1     | 0.1     |
| hsa-miR-4515      | 0.1     | 0.1     | 0.1     | 0.1     |
| hsa-miR-4516      | 130.859 | 119.303 | 141.909 | 83.6025 |
| hsa-miR-4517      | 0.1     | 0.1     | 0.1     | 0.1     |
| hsa-miR-4518      | 0.1     | 0.1     | 0.1     | 0.1     |
| hsa-miR-4519      | 0.1     | 0.1     | 0.1     | 0.1     |
| hsa-miR-451a      | 0.1     | 0.1     | 0.1     | 0.1     |
| hsa-miR-451b      | 0.1     | 0.1     | 0.1     | 0.1     |
| hsa-miR-4520-2-3p | 0.1     | 0.1     | 0.1     | 0.1     |
| hsa-miR-4520-3p   | 0.1     | 0.1     | 0.1     | 0.1     |
| hsa-miR-4520-5p   | 0.1     | 0.1     | 0.1     | 0.1     |
| hsa-miR-4521      | 1.79479 | 0.1     | 4.91098 | 0.1     |
| hsa-miR-4522      | 0.1     | 0.1     | 0.1     | 0.1     |
| hsa-miR-4523      | 0.1     | 0.1     | 0.1     | 0.1     |
| hsa-miR-452-3p    | 0.1     | 0.1     | 0.1     | 0.1     |
| hsa-miR-4524a-3p  | 0.1     | 0.1     | 0.1     | 0.1     |
| hsa-miR-4524a-5p  | 0.1     | 0.1     | 0.1     | 0.1     |
| hsa-miR-4524b-3p  | 0.1     | 0.1     | 0.1     | 0.1     |
| hsa-miR-4524b-5p  | 0.1     | 0.1     | 0.1     | 0.1     |
| hsa-miR-4525      | 0.1     | 0.1     | 0.1     | 0.1     |
| hsa-miR-452-5p    | 9.20155 | 5.12187 | 9.29683 | 7.5908  |
| hsa-miR-4526      | 0.1     | 0.1     | 0.1     | 0.1     |
| hsa-miR-4527      | 0.1     | 0.1     | 0.1     | 0.1     |
| hsa-miR-4528      | 0.1     | 0.1     | 0.1     | 0.1     |
| hsa-miR-4529-3p   | 0.1     | 0.1     | 0.1     | 0.1     |
| hsa-miR-4529-5p   | 0.1     | 0.1     | 0.1     | 0.1     |
| hsa-miR-4530      | 73.8861 | 69.4312 | 71.6951 | 49.9743 |
| hsa-miR-4531      | 0.1     | 0.1     | 0.1     | 0.1     |
| hsa-miR-4532      | 10.8484 | 7.33903 | 16.935  | 5.3998  |
| hsa-miR-4533      | 0.1     | 0.1     | 0.1     | 0.1     |
| hsa-miR-4534      | 0.1     | 0.1     | 0.1     | 0.1     |
| hsa-miR-4535      | 0.1     | 0.1     | 0.1     | 0.1     |
| hsa-miR-4536-3p   | 0.1     | 0.1     | 0.1     | 0.1     |
| hsa-miR-4536-5p   | 0.1     | 0.1     | 0.1     | 0.1     |
| hsa-miR-4537      | 0.1     | 0.1     | 0.1     | 0.1     |
| hsa-miR-4538      | 0.1     | 0.1     | 0.1     | 0.1     |
| hsa-miR-4539      | 0.1     | 0.1     | 0.1     | 0.1     |
| hsa-miR-4540      | 0.1     | 0.1     | 0.1     | 0.1     |
| hsa-miR-454-3p    | 3.80208 | 3.80192 | 4.63588 | 4.03433 |
| hsa-miR-454-5p    | 0.1     | 0.1     | 1.03362 | 0.1     |
| hsa-miR-455-3p    | 3.44541 | 23.7368 | 2.8511  | 25.9739 |
| hsa-miR-455-5p    | 0.1     | 2.43483 | 0.1     | 2.81788 |
| hsa-miR-4632-3p   | 0.1     | 0.1     | 0.1     | 0.1     |
| hsa-miR-4632-5p   | 0.1     | 0.1     | 0.1     | 0.1     |
| hsa-miR-4633-3p   | 0.1     | 0.1     | 0.1     | 0.1     |
| hsa-miR-4633-5p   | 0.1     | 0.1     | 0.1     | 0.1     |
| hsa-miR-4634      | 0.1     | 0.1     | 0.1     | 0.1     |



|                  |         |         |         |         |
|------------------|---------|---------|---------|---------|
| hsa-miR-4635     | 0.1     | 0.1     | 0.1     | 0.1     |
| hsa-miR-4636     | 0.1     | 0.1     | 0.1     | 0.1     |
| hsa-miR-4637     | 0.1     | 0.1     | 0.1     | 0.1     |
| hsa-miR-4638-3p  | 0.1     | 0.1     | 0.1     | 0.1     |
| hsa-miR-4638-5p  | 0.1     | 0.1     | 0.1     | 0.1     |
| hsa-miR-4639-3p  | 0.1     | 0.1     | 0.1     | 0.1     |
| hsa-miR-4639-5p  | 0.1     | 0.1     | 0.1     | 0.1     |
| hsa-miR-4640-3p  | 0.1     | 0.1     | 0.1     | 0.1     |
| hsa-miR-4640-5p  | 0.1     | 0.1     | 0.1     | 0.1     |
| hsa-miR-4641     | 0.1     | 0.1     | 0.1     | 0.1     |
| hsa-miR-4642     | 0.1     | 0.1     | 0.1     | 0.1     |
| hsa-miR-4643     | 0.1     | 0.1     | 0.1     | 0.1     |
| hsa-miR-4644     | 0.1     | 0.1     | 0.1     | 0.1     |
| hsa-miR-4645-3p  | 0.1     | 0.1     | 0.1     | 0.1     |
| hsa-miR-4645-5p  | 0.1     | 0.1     | 0.1     | 0.1     |
| hsa-miR-4646-3p  | 0.1     | 0.1     | 0.1     | 0.1     |
| hsa-miR-4646-5p  | 0.1     | 0.1     | 0.1     | 0.1     |
| hsa-miR-4647     | 0.1     | 0.1     | 0.1     | 0.1     |
| hsa-miR-4648     | 0.1     | 0.1     | 0.1     | 0.1     |
| hsa-miR-4649-3p  | 1.56848 | 0.1     | 0.1     | 0.1     |
| hsa-miR-4649-5p  | 0.1     | 0.1     | 0.1     | 0.1     |
| hsa-miR-4650-3p  | 0.1     | 0.1     | 0.1     | 0.1     |
| hsa-miR-4650-5p  | 0.1     | 0.1     | 0.1     | 0.1     |
| hsa-miR-4651     | 0.1     | 0.1     | 0.1     | 0.1     |
| hsa-miR-4652-3p  | 0.1     | 0.1     | 0.1     | 0.1     |
| hsa-miR-4652-5p  | 0.1     | 0.1     | 0.1     | 0.1     |
| hsa-miR-4653-3p  | 7.55247 | 7.03082 | 6.78211 | 7.52295 |
| hsa-miR-4653-5p  | 0.1     | 0.1     | 0.1     | 0.1     |
| hsa-miR-4654     | 0.1     | 0.1     | 0.1     | 0.1     |
| hsa-miR-4655-3p  | 0.1     | 0.1     | 0.1     | 0.1     |
| hsa-miR-4655-5p  | 0.1     | 0.1     | 0.1     | 0.1     |
| hsa-miR-4656     | 3.79456 | 3.65956 | 3.07688 | 2.92432 |
| hsa-miR-4657     | 0.1     | 0.1     | 0.1     | 0.1     |
| hsa-miR-4658     | 0.1     | 0.1     | 0.1     | 0.1     |
| hsa-miR-4659a-3p | 0.1     | 0.1     | 0.1     | 0.1     |
| hsa-miR-4659a-5p | 0.1     | 0.1     | 0.1     | 0.1     |
| hsa-miR-4659b-3p | 0.1     | 0.1     | 0.1     | 0.1     |
| hsa-miR-4659b-5p | 0.1     | 0.1     | 0.1     | 0.1     |
| hsa-miR-466      | 0.1     | 0.1     | 0.1     | 0.1     |
| hsa-miR-4660     | 0.1     | 0.1     | 0.1     | 0.1     |
| hsa-miR-4661-3p  | 0.1     | 0.1     | 0.1     | 0.1     |
| hsa-miR-4661-5p  | 0.1     | 0.1     | 0.1     | 0.1     |
| hsa-miR-4662a-3p | 0.1     | 0.1     | 0.1     | 0.1     |
| hsa-miR-4662a-5p | 0.1     | 0.1     | 0.1     | 0.1     |
| hsa-miR-4662b    | 0.1     | 0.1     | 0.1     | 0.1     |
| hsa-miR-4663     | 0.1     | 0.1     | 0.1     | 0.1     |
| hsa-miR-4664-3p  | 0.1     | 0.1     | 0.1     | 0.1     |
| hsa-miR-4664-5p  | 0.1     | 0.1     | 0.1     | 0.1     |
| hsa-miR-4665-3p  | 0.1     | 0.1     | 0.1     | 0.1     |
| hsa-miR-4665-5p  | 0.1     | 0.1     | 0.1     | 0.1     |
| hsa-miR-4666a-3p | 0.1     | 0.1     | 0.1     | 0.1     |
| hsa-miR-4666a-5p | 0.1     | 0.1     | 0.1     | 0.1     |
| hsa-miR-4666b    | 0.1     | 0.1     | 0.1     | 0.1     |

|                 |         |         |         |         |
|-----------------|---------|---------|---------|---------|
| hsa-miR-4667-3p | 0.1     | 0.1     | 0.1     | 0.1     |
| hsa-miR-4667-5p | 0.1     | 0.1     | 0.1     | 0.1     |
| hsa-miR-4668-3p | 0.1     | 0.1     | 0.1     | 0.1     |
| hsa-miR-4668-5p | 0.1     | 0.1     | 0.1     | 0.1     |
| hsa-miR-4669    | 6.10553 | 6.14013 | 6.02786 | 4.09671 |
| hsa-miR-4670-3p | 0.1     | 0.1     | 0.1     | 0.1     |
| hsa-miR-4670-5p | 0.1     | 0.1     | 0.1     | 0.1     |
| hsa-miR-4671-3p | 0.1     | 0.1     | 0.1     | 0.1     |
| hsa-miR-4671-5p | 0.1     | 0.1     | 0.1     | 0.1     |
| hsa-miR-4672    | 89.5601 | 59.7859 | 104.578 | 52.2676 |
| hsa-miR-4673    | 0.1     | 0.1     | 0.1     | 0.1     |
| hsa-miR-4674    | 0.1     | 0.1     | 0.1     | 0.1     |
| hsa-miR-4675    | 0.1     | 0.1     | 0.1     | 0.1     |
| hsa-miR-4676-3p | 0.1     | 0.1     | 0.1     | 0.1     |
| hsa-miR-4676-5p | 0.1     | 0.1     | 0.1     | 0.1     |
| hsa-miR-4677-3p | 0.1     | 0.1     | 0.1     | 0.1     |
| hsa-miR-4677-5p | 0.1     | 0.1     | 0.1     | 0.1     |
| hsa-miR-4678    | 0.1     | 0.1     | 0.1     | 0.1     |
| hsa-miR-4679    | 0.1     | 0.1     | 0.1     | 0.1     |
| hsa-miR-4680-3p | 0.1     | 0.1     | 0.1     | 0.1     |
| hsa-miR-4680-5p | 0.1     | 0.1     | 0.1     | 0.1     |
| hsa-miR-4681    | 0.1     | 0.1     | 0.1     | 0.1     |
| hsa-miR-4682    | 0.1     | 0.1     | 0.1     | 0.1     |
| hsa-miR-4683    | 0.1     | 0.1     | 0.1     | 0.1     |
| hsa-miR-4684-3p | 0.1     | 0.1     | 0.1     | 0.1     |
| hsa-miR-4684-5p | 0.1     | 0.1     | 0.1     | 0.1     |
| hsa-miR-4685-3p | 0.1     | 0.1     | 0.1     | 0.1     |
| hsa-miR-4685-5p | 0.1     | 0.1     | 0.1     | 0.1     |
| hsa-miR-4686    | 0.1     | 0.1     | 0.1     | 0.1     |
| hsa-miR-4687-3p | 15.2082 | 17.3587 | 19.2429 | 12.0618 |
| hsa-miR-4687-5p | 0.1     | 0.1     | 0.1     | 0.1     |
| hsa-miR-4688    | 0.1     | 0.1     | 0.1     | 0.1     |
| hsa-miR-4689    | 0.1     | 0.1     | 0.1     | 0.1     |
| hsa-miR-4690-3p | 0.1     | 0.1     | 0.1     | 0.1     |
| hsa-miR-4690-5p | 0.1     | 0.1     | 0.1     | 0.1     |
| hsa-miR-4691-3p | 0.1     | 0.1     | 0.1     | 0.1     |
| hsa-miR-4691-5p | 0.1     | 0.1     | 0.1     | 0.1     |
| hsa-miR-4692    | 0.1     | 0.1     | 0.1     | 0.1     |
| hsa-miR-4693-3p | 0.1     | 0.1     | 0.1     | 0.1     |
| hsa-miR-4693-5p | 0.1     | 0.1     | 0.1     | 0.1     |
| hsa-miR-4694-3p | 0.1     | 0.1     | 0.1     | 0.1     |
| hsa-miR-4694-5p | 0.1     | 0.1     | 0.1     | 0.1     |
| hsa-miR-4695-3p | 0.1     | 0.1     | 0.1     | 0.1     |
| hsa-miR-4695-5p | 0.1     | 0.1     | 0.1     | 0.1     |
| hsa-miR-4696    | 0.1     | 0.1     | 0.1     | 0.1     |
| hsa-miR-4697-3p | 0.1     | 0.1     | 0.1     | 0.1     |
| hsa-miR-4697-5p | 0.1     | 0.1     | 0.1     | 0.1     |
| hsa-miR-4698    | 0.1     | 0.1     | 0.1     | 0.1     |
| hsa-miR-4699-3p | 0.1     | 0.1     | 0.1     | 0.1     |
| hsa-miR-4699-5p | 0.1     | 0.1     | 0.1     | 0.1     |
| hsa-miR-4700-3p | 0.1     | 0.1     | 0.1     | 0.1     |
| hsa-miR-4700-5p | 0.1     | 0.1     | 0.1     | 0.1     |
| hsa-miR-4701-3p | 0.1     | 0.1     | 0.1     | 0.1     |

|                 |         |         |         |         |
|-----------------|---------|---------|---------|---------|
| hsa-miR-4701-5p | 0.1     | 0.1     | 0.1     | 0.1     |
| hsa-miR-4703-3p | 0.1     | 0.1     | 0.1     | 0.1     |
| hsa-miR-4703-5p | 0.1     | 0.1     | 0.1     | 0.1     |
| hsa-miR-4704-3p | 0.1     | 0.1     | 0.1     | 0.1     |
| hsa-miR-4704-5p | 0.1     | 0.1     | 0.1     | 0.1     |
| hsa-miR-4705    | 0.1     | 0.1     | 0.1     | 0.1     |
| hsa-miR-4706    | 0.1     | 0.1     | 0.1     | 0.1     |
| hsa-miR-4707-3p | 0.1     | 0.1     | 0.1     | 0.1     |
| hsa-miR-4707-5p | 0.1     | 0.1     | 0.1     | 0.1     |
| hsa-miR-4708-3p | 0.1     | 0.1     | 0.1     | 0.1     |
| hsa-miR-4708-5p | 0.1     | 0.1     | 0.1     | 0.1     |
| hsa-miR-4709-3p | 0.1     | 0.1     | 0.1     | 0.1     |
| hsa-miR-4709-5p | 0.1     | 0.1     | 0.1     | 0.1     |
| hsa-miR-4710    | 0.1     | 0.1     | 0.1     | 0.1     |
| hsa-miR-4711-3p | 0.1     | 0.1     | 0.1     | 0.1     |
| hsa-miR-4711-5p | 0.1     | 0.1     | 0.1     | 0.1     |
| hsa-miR-4712-3p | 0.1     | 0.1     | 0.1     | 0.1     |
| hsa-miR-4712-5p | 0.1     | 0.1     | 0.1     | 0.1     |
| hsa-miR-4713-3p | 18.3116 | 18.2822 | 16.5934 | 20.5511 |
| hsa-miR-4713-5p | 0.1     | 0.1     | 0.1     | 0.1     |
| hsa-miR-4714-3p | 0.1     | 0.1     | 0.1     | 0.1     |
| hsa-miR-4714-5p | 0.1     | 0.1     | 0.1     | 0.1     |
| hsa-miR-4715-3p | 0.1     | 0.1     | 0.1     | 0.1     |
| hsa-miR-4715-5p | 0.1     | 0.1     | 0.1     | 0.1     |
| hsa-miR-4716-3p | 4.71197 | 4.72807 | 5.41665 | 4.92472 |
| hsa-miR-4716-5p | 0.1     | 0.1     | 0.1     | 0.1     |
| hsa-miR-4717-3p | 0.1     | 0.1     | 0.1     | 0.1     |
| hsa-miR-4717-5p | 0.1     | 0.1     | 0.1     | 0.1     |
| hsa-miR-4718    | 0.1     | 0.1     | 0.1     | 0.1     |
| hsa-miR-4719    | 0.1     | 0.1     | 0.1     | 0.1     |
| hsa-miR-4720-3p | 0.1     | 0.1     | 0.1     | 0.1     |
| hsa-miR-4720-5p | 0.1     | 0.1     | 0.1     | 0.1     |
| hsa-miR-4721    | 11.138  | 10.5844 | 13.7326 | 9.59905 |
| hsa-miR-4722-3p | 0.1     | 0.1     | 0.1     | 0.1     |
| hsa-miR-4722-5p | 0.1     | 0.1     | 0.1     | 0.1     |
| hsa-miR-4723-3p | 0.1     | 0.1     | 0.1     | 0.1     |
| hsa-miR-4723-5p | 0.1     | 0.1     | 0.1     | 0.1     |
| hsa-miR-4724-3p | 0.1     | 0.1     | 0.1     | 0.1     |
| hsa-miR-4724-5p | 0.1     | 0.1     | 0.1     | 0.1     |
| hsa-miR-4725-3p | 0.1     | 0.1     | 0.1     | 0.1     |
| hsa-miR-4725-5p | 0.1     | 0.1     | 0.1     | 0.1     |
| hsa-miR-4726-3p | 0.1     | 0.1     | 0.1     | 0.1     |
| hsa-miR-4726-5p | 0.1     | 0.1     | 0.1     | 0.1     |
| hsa-miR-4727-3p | 0.1     | 0.1     | 0.1     | 0.1     |
| hsa-miR-4727-5p | 0.1     | 0.1     | 0.1     | 0.1     |
| hsa-miR-4728-3p | 0.1     | 0.1     | 0.1     | 0.1     |
| hsa-miR-4728-5p | 21.849  | 21.5353 | 25.8723 | 21.9524 |
| hsa-miR-4729    | 0.1     | 0.1     | 0.1     | 0.1     |
| hsa-miR-4730    | 0.1     | 0.1     | 0.1     | 0.1     |
| hsa-miR-4731-3p | 0.1     | 0.1     | 0.1     | 0.1     |
| hsa-miR-4731-5p | 0.1     | 0.1     | 0.1     | 0.1     |
| hsa-miR-4732-3p | 0.1     | 0.1     | 0.1     | 0.1     |
| hsa-miR-4732-5p | 0.1     | 0.1     | 0.1     | 0.1     |

|                 |         |         |         |         |
|-----------------|---------|---------|---------|---------|
| hsa-miR-4733-3p | 0.1     | 0.1     | 0.1     | 0.1     |
| hsa-miR-4733-5p | 0.1     | 0.1     | 0.1     | 0.1     |
| hsa-miR-4734    | 0.1     | 0.1     | 0.1     | 0.1     |
| hsa-miR-4735-3p | 0.1     | 0.1     | 0.1     | 0.1     |
| hsa-miR-4735-5p | 0.1     | 0.1     | 0.1     | 0.1     |
| hsa-miR-4736    | 0.1     | 0.1     | 0.1     | 0.1     |
| hsa-miR-4737    | 0.1     | 0.1     | 0.1     | 0.1     |
| hsa-miR-4738-3p | 0.1     | 0.1     | 0.1     | 0.1     |
| hsa-miR-4738-5p | 0.1     | 0.1     | 0.1     | 0.1     |
| hsa-miR-4739    | 6.28922 | 5.93873 | 7.72145 | 4.74066 |
| hsa-miR-4740-3p | 0.1     | 0.1     | 0.1     | 0.1     |
| hsa-miR-4740-5p | 0.1     | 0.1     | 0.1     | 0.1     |
| hsa-miR-4741    | 1.50626 | 1.96221 | 5.28149 | 0.1     |
| hsa-miR-4742-3p | 0.1     | 0.1     | 0.1     | 0.1     |
| hsa-miR-4742-5p | 0.1     | 0.1     | 0.1     | 0.1     |
| hsa-miR-4743-3p | 0.1     | 0.1     | 0.1     | 0.1     |
| hsa-miR-4743-5p | 0.1     | 0.1     | 0.1     | 0.1     |
| hsa-miR-4744    | 0.1     | 0.1     | 0.1     | 0.1     |
| hsa-miR-4745-3p | 0.1     | 0.1     | 0.1     | 0.1     |
| hsa-miR-4745-5p | 0.1     | 0.1     | 0.1     | 0.1     |
| hsa-miR-4746-3p | 6.36476 | 4.76702 | 9.70366 | 3.41283 |
| hsa-miR-4746-5p | 0.1     | 0.1     | 0.1     | 0.1     |
| hsa-miR-4747-3p | 0.1     | 0.1     | 0.1     | 0.1     |
| hsa-miR-4747-5p | 0.1     | 0.1     | 0.1     | 0.1     |
| hsa-miR-4748    | 0.1     | 0.1     | 0.1     | 0.1     |
| hsa-miR-4749-3p | 0.1     | 0.1     | 0.1     | 0.1     |
| hsa-miR-4749-5p | 0.1     | 0.1     | 0.1     | 0.1     |
| hsa-miR-4750-3p | 0.1     | 0.1     | 0.1     | 0.1     |
| hsa-miR-4750-5p | 0.1     | 0.1     | 0.1     | 0.1     |
| hsa-miR-4751    | 0.1     | 0.1     | 0.1     | 0.1     |
| hsa-miR-4752    | 0.1     | 0.1     | 0.1     | 0.1     |
| hsa-miR-4753-3p | 0.1     | 0.1     | 0.1     | 0.1     |
| hsa-miR-4753-5p | 0.1     | 0.1     | 0.1     | 0.1     |
| hsa-miR-4754    | 0.1     | 0.1     | 1.98089 | 0.1     |
| hsa-miR-4755-3p | 0.1     | 0.1     | 0.1     | 0.1     |
| hsa-miR-4755-5p | 0.1     | 0.1     | 0.1     | 0.1     |
| hsa-miR-4756-3p | 0.1     | 0.1     | 0.1     | 0.1     |
| hsa-miR-4756-5p | 0.1     | 0.1     | 0.1     | 0.1     |
| hsa-miR-4757-3p | 0.1     | 0.1     | 0.1     | 0.1     |
| hsa-miR-4757-5p | 0.1     | 0.1     | 0.1     | 0.1     |
| hsa-miR-4758-3p | 0.1     | 0.1     | 0.1     | 0.1     |
| hsa-miR-4758-5p | 0.1     | 0.1     | 0.1     | 0.1     |
| hsa-miR-4759    | 0.1     | 0.1     | 0.1     | 0.1     |
| hsa-miR-4760-3p | 0.1     | 0.1     | 0.1     | 0.1     |
| hsa-miR-4760-5p | 0.1     | 0.1     | 0.1     | 0.1     |
| hsa-miR-4761-3p | 0.1     | 0.1     | 0.1     | 0.1     |
| hsa-miR-4761-5p | 0.1     | 0.1     | 0.1     | 0.1     |
| hsa-miR-4762-3p | 0.1     | 0.1     | 0.1     | 0.1     |
| hsa-miR-4762-5p | 0.1     | 0.1     | 0.1     | 0.1     |
| hsa-miR-4763-3p | 7.32581 | 7.40442 | 9.34523 | 4.24792 |
| hsa-miR-4763-5p | 0.1     | 0.1     | 0.1     | 0.1     |
| hsa-miR-4764-3p | 0.1     | 0.1     | 0.1     | 0.1     |
| hsa-miR-4764-5p | 0.1     | 0.1     | 0.1     | 0.1     |

|                 |         |         |         |         |
|-----------------|---------|---------|---------|---------|
| hsa-miR-4765    | 0.1     | 0.1     | 0.1     | 0.1     |
| hsa-miR-4766-3p | 0.1     | 0.1     | 0.1     | 0.1     |
| hsa-miR-4766-5p | 0.1     | 0.1     | 0.1     | 0.1     |
| hsa-miR-4767    | 0.1     | 0.1     | 0.1     | 0.1     |
| hsa-miR-4768-3p | 0.1     | 0.1     | 0.1     | 0.1     |
| hsa-miR-4768-5p | 0.1     | 0.1     | 0.1     | 0.1     |
| hsa-miR-4769-3p | 0.1     | 0.1     | 0.1     | 0.1     |
| hsa-miR-4769-5p | 0.1     | 0.1     | 0.1     | 0.1     |
| hsa-miR-4770    | 0.1     | 0.1     | 0.1     | 0.1     |
| hsa-miR-4771    | 0.1     | 0.1     | 0.1     | 0.1     |
| hsa-miR-4772-3p | 0.1     | 0.1     | 0.1     | 0.1     |
| hsa-miR-4772-5p | 0.1     | 0.1     | 0.1     | 0.1     |
| hsa-miR-4773    | 0.1     | 0.1     | 0.1     | 0.1     |
| hsa-miR-4774-3p | 0.1     | 0.1     | 0.1     | 0.1     |
| hsa-miR-4774-5p | 0.1     | 0.1     | 0.1     | 0.1     |
| hsa-miR-4775    | 0.1     | 0.1     | 0.1     | 0.1     |
| hsa-miR-4776-3p | 0.1     | 0.1     | 0.1     | 0.1     |
| hsa-miR-4776-5p | 0.1     | 0.1     | 0.1     | 0.1     |
| hsa-miR-4777-3p | 0.1     | 0.1     | 0.1     | 0.1     |
| hsa-miR-4777-5p | 0.1     | 0.1     | 0.1     | 0.1     |
| hsa-miR-4778-3p | 0.1     | 0.1     | 0.1     | 0.1     |
| hsa-miR-4778-5p | 0.1     | 0.1     | 0.1     | 0.1     |
| hsa-miR-4779    | 0.1     | 0.1     | 0.1     | 0.1     |
| hsa-miR-4780    | 0.1     | 0.1     | 0.1     | 0.1     |
| hsa-miR-4781-3p | 0.1     | 0.1     | 0.1     | 0.1     |
| hsa-miR-4781-5p | 0.1     | 0.1     | 0.1     | 0.1     |
| hsa-miR-4782-3p | 0.1     | 0.1     | 0.1     | 0.1     |
| hsa-miR-4782-5p | 0.1     | 0.1     | 0.1     | 0.1     |
| hsa-miR-4783-3p | 0.1     | 0.1     | 0.1     | 0.1     |
| hsa-miR-4783-5p | 0.1     | 0.1     | 0.1     | 0.1     |
| hsa-miR-4784    | 0.1     | 0.1     | 0.1     | 0.1     |
| hsa-miR-4785    | 0.1     | 0.1     | 0.1     | 0.1     |
| hsa-miR-4786-3p | 0.1     | 0.1     | 0.1     | 0.1     |
| hsa-miR-4786-5p | 0.1     | 0.1     | 0.1     | 0.1     |
| hsa-miR-4787-3p | 0.1     | 0.1     | 0.1     | 0.1     |
| hsa-miR-4787-5p | 18.7862 | 21.3606 | 25.3471 | 18.5132 |
| hsa-miR-4788    | 18.3858 | 13.0648 | 55.9701 | 9.48473 |
| hsa-miR-4789-3p | 0.1     | 0.1     | 0.1     | 0.1     |
| hsa-miR-4789-5p | 0.1     | 0.1     | 0.1     | 0.1     |
| hsa-miR-4790-3p | 0.1     | 0.1     | 0.1     | 0.1     |
| hsa-miR-4790-5p | 0.1     | 0.1     | 0.1     | 0.1     |
| hsa-miR-4791    | 0.1     | 0.1     | 0.1     | 0.1     |
| hsa-miR-4792    | 0.1     | 0.1     | 0.1     | 0.1     |
| hsa-miR-4793-3p | 0.1     | 0.1     | 0.1     | 0.1     |
| hsa-miR-4793-5p | 0.1     | 0.1     | 0.1     | 0.1     |
| hsa-miR-4794    | 0.1     | 0.1     | 0.1     | 0.1     |
| hsa-miR-4795-3p | 0.1     | 0.1     | 0.1     | 0.1     |
| hsa-miR-4795-5p | 0.1     | 0.1     | 0.1     | 0.1     |
| hsa-miR-4796-3p | 0.1     | 0.1     | 0.1     | 0.1     |
| hsa-miR-4796-5p | 0.1     | 0.1     | 0.1     | 0.1     |
| hsa-miR-4797-3p | 0.1     | 0.1     | 0.1     | 0.1     |
| hsa-miR-4797-5p | 0.1     | 0.1     | 0.1     | 0.1     |
| hsa-miR-4798-3p | 0.1     | 0.1     | 0.1     | 0.1     |

|                 |         |         |         |         |
|-----------------|---------|---------|---------|---------|
| hsa-miR-4798-5p | 0.1     | 0.1     | 0.1     | 0.1     |
| hsa-miR-4799-3p | 0.1     | 0.1     | 0.1     | 0.1     |
| hsa-miR-4799-5p | 0.1     | 0.1     | 0.1     | 0.1     |
| hsa-miR-4800-3p | 0.1     | 0.1     | 0.1     | 0.1     |
| hsa-miR-4800-5p | 0.1     | 0.1     | 7.50369 | 0.1     |
| hsa-miR-4801    | 0.1     | 0.1     | 0.1     | 0.1     |
| hsa-miR-4802-3p | 0.1     | 0.1     | 0.1     | 0.1     |
| hsa-miR-4802-5p | 0.1     | 0.1     | 0.1     | 0.1     |
| hsa-miR-4803    | 0.1     | 0.1     | 0.1     | 0.1     |
| hsa-miR-4804-3p | 0.1     | 0.1     | 0.1     | 0.1     |
| hsa-miR-4804-5p | 0.1     | 0.1     | 0.1     | 0.1     |
| hsa-miR-483-3p  | 0.1     | 0.1     | 0.1     | 1.61483 |
| hsa-miR-483-5p  | 2.02164 | 3.1734  | 7.91017 | 1.84785 |
| hsa-miR-484     | 6.01518 | 6.34769 | 11.2216 | 9.45559 |
| hsa-miR-485-3p  | 0.1     | 0.1     | 0.1     | 0.1     |
| hsa-miR-485-5p  | 0.1     | 0.1     | 0.1     | 0.1     |
| hsa-miR-486-3p  | 0.1     | 0.1     | 0.1     | 0.1     |
| hsa-miR-486-5p  | 0.1     | 0.1     | 0.1     | 0.1     |
| hsa-miR-487a-3p | 0.1     | 0.1     | 0.1     | 0.1     |
| hsa-miR-487a-5p | 0.1     | 0.1     | 0.1     | 0.1     |
| hsa-miR-487b-3p | 0.1     | 0.1     | 0.1     | 1.87659 |
| hsa-miR-487b-5p | 0.1     | 0.1     | 0.1     | 0.1     |
| hsa-miR-488-3p  | 0.1     | 0.1     | 0.1     | 0.1     |
| hsa-miR-488-5p  | 0.1     | 0.1     | 0.1     | 0.1     |
| hsa-miR-489-3p  | 0.1     | 0.1     | 0.1     | 0.1     |
| hsa-miR-489-5p  | 0.1     | 0.1     | 0.1     | 0.1     |
| hsa-miR-490-3p  | 0.1     | 0.1     | 0.1     | 0.1     |
| hsa-miR-490-5p  | 0.1     | 0.1     | 0.1     | 0.1     |
| hsa-miR-491-3p  | 0.1     | 0.1     | 0.1     | 0.1     |
| hsa-miR-491-5p  | 0.1     | 0.1     | 0.1     | 0.1     |
| hsa-miR-492     | 0.1     | 0.1     | 0.1     | 0.1     |
| hsa-miR-493-3p  | 0.1     | 0.1     | 0.1     | 0.1     |
| hsa-miR-493-5p  | 0.1     | 0.1     | 0.1     | 0.1     |
| hsa-miR-494-3p  | 167.306 | 183.048 | 162.34  | 170.648 |
| hsa-miR-494-5p  | 0.1     | 0.1     | 0.1     | 0.1     |
| hsa-miR-495-3p  | 0.1     | 0.1     | 0.1     | 2.03783 |
| hsa-miR-495-5p  | 0.1     | 0.1     | 0.1     | 0.1     |
| hsa-miR-496     | 0.1     | 0.1     | 0.1     | 0.1     |
| hsa-miR-497-3p  | 0.1     | 0.1     | 0.1     | 0.1     |
| hsa-miR-497-5p  | 0.1     | 0.1     | 0.1     | 0.1     |
| hsa-miR-498     | 0.1     | 0.1     | 0.1     | 0.1     |
| hsa-miR-4999-3p | 0.1     | 0.1     | 0.1     | 0.1     |
| hsa-miR-4999-5p | 0.1     | 0.1     | 0.1     | 0.1     |
| hsa-miR-499a-3p | 0.1     | 0.1     | 0.1     | 0.1     |
| hsa-miR-499a-5p | 0.1     | 0.1     | 0.1     | 0.1     |
| hsa-miR-499b-3p | 0.1     | 0.1     | 0.1     | 0.1     |
| hsa-miR-499b-5p | 0.1     | 0.1     | 0.1     | 0.1     |
| hsa-miR-5000-3p | 0.1     | 0.1     | 0.1     | 0.1     |
| hsa-miR-5000-5p | 0.1     | 0.1     | 0.1     | 0.1     |
| hsa-miR-5001-3p | 0.1     | 0.1     | 0.1     | 0.1     |
| hsa-miR-5001-5p | 26.1111 | 22.4582 | 32.1354 | 18.4121 |
| hsa-miR-5002-3p | 0.1     | 0.1     | 0.1     | 0.1     |
| hsa-miR-5002-5p | 0.1     | 0.1     | 0.1     | 0.1     |

|                  |         |         |         |         |
|------------------|---------|---------|---------|---------|
| hsa-miR-5003-3p  | 0.1     | 0.1     | 0.1     | 0.1     |
| hsa-miR-5003-5p  | 0.1     | 0.1     | 0.1     | 0.1     |
| hsa-miR-5004-3p  | 0.1     | 0.1     | 0.1     | 0.1     |
| hsa-miR-5004-5p  | 0.1     | 0.1     | 0.1     | 0.1     |
| hsa-miR-5006-3p  | 0.1     | 0.1     | 0.1     | 0.1     |
| hsa-miR-5006-5p  | 5.72018 | 5.65652 | 5.1686  | 4.04688 |
| hsa-miR-5007-3p  | 0.1     | 0.1     | 0.1     | 0.1     |
| hsa-miR-5007-5p  | 0.1     | 0.1     | 0.1     | 0.1     |
| hsa-miR-5008-3p  | 0.1     | 0.1     | 0.1     | 0.1     |
| hsa-miR-5008-5p  | 0.1     | 0.1     | 0.1     | 0.1     |
| hsa-miR-5009-3p  | 0.1     | 0.1     | 0.1     | 0.1     |
| hsa-miR-5009-5p  | 0.1     | 0.1     | 0.1     | 0.1     |
| hsa-miR-500a-3p  | 0.1     | 0.1     | 0.1     | 0.1     |
| hsa-miR-500a-5p  | 0.1     | 0.1     | 0.1     | 0.1     |
| hsa-miR-500b-3p  | 0.1     | 0.1     | 0.1     | 0.1     |
| hsa-miR-500b-5p  | 0.1     | 0.1     | 0.1     | 0.1     |
| hsa-miR-5010-3p  | 0.1     | 0.1     | 0.1     | 0.1     |
| hsa-miR-5010-5p  | 0.1     | 0.1     | 0.1     | 0.1     |
| hsa-miR-5011-3p  | 0.1     | 0.1     | 0.1     | 0.1     |
| hsa-miR-5011-5p  | 0.1     | 0.1     | 0.1     | 0.1     |
| hsa-miR-501-3p   | 0.1     | 0.1     | 0.1     | 0.1     |
| hsa-miR-501-5p   | 0.1     | 0.1     | 0.1     | 0.1     |
| hsa-miR-502-3p   | 0.1     | 0.1     | 0.1     | 0.1     |
| hsa-miR-502-5p   | 0.1     | 0.1     | 0.1     | 0.1     |
| hsa-miR-503-3p   | 0.1     | 0.1     | 0.1     | 0.1     |
| hsa-miR-503-5p   | 3.87002 | 23.5832 | 0.1     | 28.5039 |
| hsa-miR-504-3p   | 0.1     | 0.1     | 0.1     | 0.1     |
| hsa-miR-504-5p   | 0.1     | 0.1     | 0.1     | 0.1     |
| hsa-miR-5047     | 0.1     | 0.1     | 0.1     | 0.1     |
| hsa-miR-505-3p   | 1.76987 | 0.1     | 0.1     | 0.1     |
| hsa-miR-505-5p   | 0.1     | 0.1     | 0.1     | 0.1     |
| hsa-miR-506-3p   | 0.1     | 0.1     | 0.1     | 0.1     |
| hsa-miR-506-5p   | 0.1     | 0.1     | 0.1     | 0.1     |
| hsa-miR-507      | 0.1     | 0.1     | 0.1     | 0.1     |
| hsa-miR-508-3p   | 0.1     | 0.1     | 0.1     | 0.1     |
| hsa-miR-508-5p   | 0.1     | 0.1     | 0.1     | 0.1     |
| hsa-miR-5087     | 0.1     | 0.1     | 0.1     | 0.1     |
| hsa-miR-5088-3p  | 0.1     | 0.1     | 0.1     | 0.1     |
| hsa-miR-5088-5p  | 0.1     | 0.1     | 0.1     | 0.1     |
| hsa-miR-5089-3p  | 0.1     | 0.1     | 0.1     | 0.1     |
| hsa-miR-5089-5p  | 0.1     | 0.1     | 0.1     | 0.1     |
| hsa-miR-5090     | 0.1     | 0.1     | 0.1     | 0.1     |
| hsa-miR-5091     | 0.1     | 0.1     | 0.1     | 0.1     |
| hsa-miR-5092     | 0.1     | 0.1     | 0.1     | 0.1     |
| hsa-miR-5093     | 0.1     | 0.1     | 0.1     | 0.1     |
| hsa-miR-509-3-5p | 0.1     | 0.1     | 0.1     | 0.1     |
| hsa-miR-509-3p   | 0.1     | 0.1     | 0.1     | 0.1     |
| hsa-miR-5094     | 0.1     | 0.1     | 0.1     | 0.1     |
| hsa-miR-5095     | 0.1     | 0.1     | 0.1     | 0.1     |
| hsa-miR-509-5p   | 0.1     | 0.1     | 0.1     | 0.1     |
| hsa-miR-5096     | 0.1     | 0.1     | 0.1     | 0.1     |
| hsa-miR-5100     | 204.934 | 648.982 | 170.116 | 1108.44 |
| hsa-miR-510-3p   | 0.1     | 0.1     | 0.1     | 0.1     |

|                 |         |         |         |         |
|-----------------|---------|---------|---------|---------|
| hsa-miR-510-5p  | 0.1     | 0.1     | 0.1     | 0.1     |
| hsa-miR-511-3p  | 0.1     | 0.1     | 0.1     | 0.1     |
| hsa-miR-511-5p  | 0.1     | 0.1     | 0.1     | 0.1     |
| hsa-miR-512-3p  | 0.1     | 0.1     | 0.1     | 0.1     |
| hsa-miR-512-5p  | 0.1     | 0.1     | 0.1     | 0.1     |
| hsa-miR-513a-3p | 0.1     | 0.1     | 0.1     | 0.1     |
| hsa-miR-513a-5p | 4.77834 | 2.82654 | 1.915   | 1.80526 |
| hsa-miR-513b-3p | 0.1     | 0.1     | 0.1     | 0.1     |
| hsa-miR-513b-5p | 1.46954 | 1.43079 | 1.15595 | 1.1109  |
| hsa-miR-513c-3p | 0.1     | 0.1     | 0.1     | 0.1     |
| hsa-miR-513c-5p | 0.1     | 0.1     | 0.1     | 0.1     |
| hsa-miR-514a-3p | 0.1     | 0.1     | 0.1     | 0.1     |
| hsa-miR-514a-5p | 0.1     | 0.1     | 0.1     | 0.1     |
| hsa-miR-514b-3p | 0.1     | 0.1     | 0.1     | 0.1     |
| hsa-miR-514b-5p | 0.1     | 0.1     | 0.1     | 0.1     |
| hsa-miR-515-3p  | 0.1     | 0.1     | 0.1     | 0.1     |
| hsa-miR-515-5p  | 0.1     | 0.1     | 0.1     | 0.1     |
| hsa-miR-516a-3p | 0.1     | 0.1     | 0.1     | 0.1     |
| hsa-miR-516a-5p | 0.1     | 0.1     | 0.1     | 0.1     |
| hsa-miR-516b-5p | 0.1     | 0.1     | 0.1     | 0.1     |
| hsa-miR-517-5p  | 0.1     | 0.1     | 0.1     | 0.1     |
| hsa-miR-517a-3p | 0.1     | 0.1     | 0.1     | 0.1     |
| hsa-miR-517c-3p | 0.1     | 0.1     | 0.1     | 0.1     |
| hsa-miR-5186    | 0.1     | 0.1     | 0.1     | 0.1     |
| hsa-miR-5187-3p | 0.1     | 0.1     | 0.1     | 0.1     |
| hsa-miR-5187-5p | 0.1     | 0.1     | 0.1     | 0.1     |
| hsa-miR-5188    | 1.5752  | 1.8591  | 11.5498 | 0.1     |
| hsa-miR-5189-3p | 0.1     | 0.1     | 0.1     | 0.1     |
| hsa-miR-5189-5p | 0.1     | 0.1     | 0.1     | 0.1     |
| hsa-miR-518a-3p | 0.1     | 0.1     | 0.1     | 0.1     |
| hsa-miR-518a-5p | 0.1     | 0.1     | 0.1     | 0.1     |
| hsa-miR-518b    | 0.1     | 0.1     | 0.1     | 0.1     |
| hsa-miR-518c-3p | 0.1     | 0.1     | 0.1     | 0.1     |
| hsa-miR-518c-5p | 0.1     | 0.1     | 0.1     | 0.1     |
| hsa-miR-518d-3p | 0.1     | 0.1     | 0.1     | 0.1     |
| hsa-miR-518e-3p | 0.1     | 0.1     | 0.1     | 0.1     |
| hsa-miR-518e-5p | 0.1     | 0.1     | 0.1     | 0.1     |
| hsa-miR-518f-3p | 0.1     | 0.1     | 0.1     | 0.1     |
| hsa-miR-518f-5p | 0.1     | 0.1     | 0.1     | 0.1     |
| hsa-miR-5190    | 0.1     | 0.1     | 0.1     | 0.1     |
| hsa-miR-5191    | 0.1     | 0.1     | 0.1     | 0.1     |
| hsa-miR-5192    | 0.1     | 0.1     | 0.1     | 0.1     |
| hsa-miR-5193    | 0.1     | 0.1     | 0.1     | 0.1     |
| hsa-miR-5194    | 3.47877 | 1.77137 | 7.6738  | 3.54358 |
| hsa-miR-5195-3p | 0.1     | 0.1     | 0.1     | 0.1     |
| hsa-miR-5195-5p | 0.1     | 0.1     | 0.1     | 0.1     |
| hsa-miR-5196-3p | 0.1     | 0.1     | 0.1     | 0.1     |
| hsa-miR-5196-5p | 0.1     | 0.1     | 0.1     | 0.1     |
| hsa-miR-5197-3p | 0.1     | 0.1     | 0.1     | 0.1     |
| hsa-miR-5197-5p | 0.1     | 0.1     | 0.1     | 0.1     |
| hsa-miR-519b-3p | 0.1     | 0.1     | 0.1     | 0.1     |
| hsa-miR-519c-3p | 0.1     | 0.1     | 0.1     | 0.1     |
| hsa-miR-519d-3p | 0.1     | 0.1     | 0.1     | 0.1     |



|                  |         |         |     |         |
|------------------|---------|---------|-----|---------|
| hsa-miR-519d-5p  | 0.1     | 0.1     | 0.1 | 0.1     |
| hsa-miR-519e-3p  | 0.1     | 0.1     | 0.1 | 0.1     |
| hsa-miR-519e-5p  | 0.1     | 0.1     | 0.1 | 0.1     |
| hsa-miR-520a-3p  | 0.1     | 0.1     | 0.1 | 0.1     |
| hsa-miR-520a-5p  | 0.1     | 0.1     | 0.1 | 0.1     |
| hsa-miR-520b     | 0.1     | 0.1     | 0.1 | 0.1     |
| hsa-miR-520c-3p  | 0.1     | 0.1     | 0.1 | 0.1     |
| hsa-miR-520d-3p  | 0.1     | 0.1     | 0.1 | 0.1     |
| hsa-miR-520e     | 0.1     | 0.1     | 0.1 | 0.1     |
| hsa-miR-520f-3p  | 0.1     | 0.1     | 0.1 | 0.1     |
| hsa-miR-520f-5p  | 0.1     | 0.1     | 0.1 | 0.1     |
| hsa-miR-520g-3p  | 0.1     | 0.1     | 0.1 | 0.1     |
| hsa-miR-520g-5p  | 0.1     | 0.1     | 0.1 | 0.1     |
| hsa-miR-520h     | 0.1     | 0.1     | 0.1 | 0.1     |
| hsa-miR-521      | 0.1     | 0.1     | 0.1 | 0.1     |
| hsa-miR-522-3p   | 0.1     | 0.1     | 0.1 | 0.1     |
| hsa-miR-523-3p   | 0.1     | 0.1     | 0.1 | 0.1     |
| hsa-miR-524-3p   | 0.1     | 0.1     | 0.1 | 0.1     |
| hsa-miR-525-3p   | 0.1     | 0.1     | 0.1 | 0.1     |
| hsa-miR-525-5p   | 0.1     | 0.1     | 0.1 | 0.1     |
| hsa-miR-526b-3p  | 0.1     | 0.1     | 0.1 | 0.1     |
| hsa-miR-526b-5p  | 0.1     | 0.1     | 0.1 | 0.1     |
| hsa-miR-532-3p   | 0.1     | 0.1     | 0.1 | 0.1     |
| hsa-miR-532-5p   | 2.01409 | 0.1     | 0.1 | 1.81855 |
| hsa-miR-539-3p   | 0.1     | 0.1     | 0.1 | 0.1     |
| hsa-miR-539-5p   | 0.1     | 0.1     | 0.1 | 0.1     |
| hsa-miR-541-3p   | 0.1     | 0.1     | 0.1 | 0.1     |
| hsa-miR-541-5p   | 0.1     | 0.1     | 0.1 | 0.1     |
| hsa-miR-542-3p   | 0.1     | 2.84704 | 0.1 | 6.87496 |
| hsa-miR-542-5p   | 0.1     | 0.1     | 0.1 | 2.11544 |
| hsa-miR-543      | 0.1     | 0.1     | 0.1 | 0.1     |
| hsa-miR-544a     | 0.1     | 0.1     | 0.1 | 0.1     |
| hsa-miR-544b     | 0.1     | 0.1     | 0.1 | 0.1     |
| hsa-miR-545-3p   | 0.1     | 0.1     | 0.1 | 0.1     |
| hsa-miR-545-5p   | 0.1     | 0.1     | 0.1 | 0.1     |
| hsa-miR-548a-3p  | 0.1     | 0.1     | 0.1 | 0.1     |
| hsa-miR-548a-5p  | 0.1     | 0.1     | 0.1 | 0.1     |
| hsa-miR-548aa    | 0.1     | 0.1     | 0.1 | 0.1     |
| hsa-miR-548ab    | 0.1     | 0.1     | 0.1 | 0.1     |
| hsa-miR-548ac    | 0.1     | 0.1     | 0.1 | 0.1     |
| hsa-miR-548ad-3p | 0.1     | 0.1     | 0.1 | 0.1     |
| hsa-miR-548ad-5p | 0.1     | 0.1     | 0.1 | 0.1     |
| hsa-miR-548ae-3p | 0.1     | 0.1     | 0.1 | 0.1     |
| hsa-miR-548ag    | 0.1     | 0.1     | 0.1 | 0.1     |
| hsa-miR-548ah-5p | 0.1     | 0.1     | 0.1 | 0.1     |
| hsa-miR-548ai    | 0.1     | 0.1     | 0.1 | 0.1     |
| hsa-miR-548aj-3p | 0.1     | 0.1     | 0.1 | 0.1     |
| hsa-miR-548aj-5p | 0.1     | 0.1     | 0.1 | 0.1     |
| hsa-miR-548ak    | 0.1     | 0.1     | 0.1 | 0.1     |
| hsa-miR-548al    | 0.1     | 0.1     | 0.1 | 0.1     |
| hsa-miR-548am-3p | 0.1     | 0.1     | 0.1 | 0.1     |
| hsa-miR-548am-5p | 0.1     | 0.1     | 0.1 | 0.1     |
| hsa-miR-548an    | 0.1     | 0.1     | 0.1 | 0.1     |

|                  |     |          |     |     |
|------------------|-----|----------|-----|-----|
| hsa-miR-548ao-3p | 0.1 | 0.1      | 0.1 | 0.1 |
| hsa-miR-548ao-5p | 0.1 | 0.1      | 0.1 | 0.1 |
| hsa-miR-548ap-3p | 0.1 | 0.1      | 0.1 | 0.1 |
| hsa-miR-548ap-5p | 0.1 | 0.1      | 0.1 | 0.1 |
| hsa-miR-548aq-5p | 0.1 | 0.1      | 0.1 | 0.1 |
| hsa-miR-548ar-3p | 0.1 | 0.1      | 0.1 | 0.1 |
| hsa-miR-548ar-5p | 0.1 | 0.1      | 0.1 | 0.1 |
| hsa-miR-548as-3p | 0.1 | 0.1      | 0.1 | 0.1 |
| hsa-miR-548as-5p | 0.1 | 0.1      | 0.1 | 0.1 |
| hsa-miR-548at-3p | 0.1 | 0.1      | 0.1 | 0.1 |
| hsa-miR-548at-5p | 0.1 | 0.1      | 0.1 | 0.1 |
| hsa-miR-548au-3p | 0.1 | 0.1      | 0.1 | 0.1 |
| hsa-miR-548au-5p | 0.1 | 0.1      | 0.1 | 0.1 |
| hsa-miR-548av-3p | 0.1 | 0.1      | 0.1 | 0.1 |
| hsa-miR-548av-5p | 0.1 | 0.1      | 0.1 | 0.1 |
| hsa-miR-548aw    | 0.1 | 0.1      | 0.1 | 0.1 |
| hsa-miR-548ax    | 0.1 | 0.1      | 0.1 | 0.1 |
| hsa-miR-548ay-3p | 0.1 | 0.1      | 0.1 | 0.1 |
| hsa-miR-548ay-5p | 0.1 | 0.1      | 0.1 | 0.1 |
| hsa-miR-548az-3p | 0.1 | 0.1      | 0.1 | 0.1 |
| hsa-miR-548az-5p | 0.1 | 0.1      | 0.1 | 0.1 |
| hsa-miR-548b-3p  | 0.1 | 0.1      | 0.1 | 0.1 |
| hsa-miR-548b-5p  | 0.1 | 0.1      | 0.1 | 0.1 |
| hsa-miR-548ba    | 0.1 | 0.1      | 0.1 | 0.1 |
| hsa-miR-548bb-3p | 0.1 | 0.1      | 0.1 | 0.1 |
| hsa-miR-548bb-5p | 0.1 | 0.1      | 0.1 | 0.1 |
| hsa-miR-548c-3p  | 0.1 | 0.945076 | 0.1 | 0.1 |
| hsa-miR-548d-3p  | 0.1 | 0.1      | 0.1 | 0.1 |
| hsa-miR-548d-5p  | 0.1 | 0.1      | 0.1 | 0.1 |
| hsa-miR-548e-3p  | 0.1 | 0.1      | 0.1 | 0.1 |
| hsa-miR-548e-5p  | 0.1 | 0.1      | 0.1 | 0.1 |
| hsa-miR-548f-3p  | 0.1 | 0.1      | 0.1 | 0.1 |
| hsa-miR-548f-5p  | 0.1 | 0.1      | 0.1 | 0.1 |
| hsa-miR-548g-3p  | 0.1 | 0.1      | 0.1 | 0.1 |
| hsa-miR-548h-3p  | 0.1 | 0.1      | 0.1 | 0.1 |
| hsa-miR-548h-5p  | 0.1 | 0.1      | 0.1 | 0.1 |
| hsa-miR-548i     | 0.1 | 0.1      | 0.1 | 0.1 |
| hsa-miR-548j-3p  | 0.1 | 0.1      | 0.1 | 0.1 |
| hsa-miR-548j-5p  | 0.1 | 0.1      | 0.1 | 0.1 |
| hsa-miR-548k     | 0.1 | 0.1      | 0.1 | 0.1 |
| hsa-miR-548l     | 0.1 | 0.1      | 0.1 | 0.1 |
| hsa-miR-548m     | 0.1 | 0.1      | 0.1 | 0.1 |
| hsa-miR-548n     | 0.1 | 0.1      | 0.1 | 0.1 |
| hsa-miR-548p     | 0.1 | 0.1      | 0.1 | 0.1 |
| hsa-miR-548q     | 0.1 | 0.1      | 0.1 | 0.1 |
| hsa-miR-548s     | 0.1 | 0.1      | 0.1 | 0.1 |
| hsa-miR-548t-5p  | 0.1 | 0.1      | 0.1 | 0.1 |
| hsa-miR-548u     | 0.1 | 0.1      | 0.1 | 0.1 |
| hsa-miR-548v     | 0.1 | 0.1      | 0.1 | 0.1 |
| hsa-miR-548w     | 0.1 | 0.1      | 0.1 | 0.1 |
| hsa-miR-548x-3p  | 0.1 | 0.1      | 0.1 | 0.1 |
| hsa-miR-548y     | 0.1 | 0.1      | 0.1 | 0.1 |
| hsa-miR-549a     | 0.1 | 0.1      | 0.1 | 0.1 |

|                   |         |         |         |         |
|-------------------|---------|---------|---------|---------|
| hsa-miR-550a-3-5p | 0.1     | 0.1     | 0.1     | 0.1     |
| hsa-miR-550a-3p   | 5.44168 | 5.08239 | 3.03806 | 3.68621 |
| hsa-miR-550a-5p   | 0.1     | 0.1     | 0.1     | 0.1     |
| hsa-miR-550b-2-5p | 0.1     | 0.1     | 0.1     | 0.1     |
| hsa-miR-550b-3p   | 0.1     | 0.1     | 0.1     | 0.1     |
| hsa-miR-551a      | 0.1     | 0.1     | 0.1     | 0.1     |
| hsa-miR-551b-3p   | 0.1     | 0.1     | 0.1     | 0.1     |
| hsa-miR-551b-5p   | 0.1     | 0.1     | 0.1     | 0.1     |
| hsa-miR-552-3p    | 0.1     | 0.1     | 0.1     | 0.1     |
| hsa-miR-552-5p    | 0.1     | 0.1     | 0.1     | 0.1     |
| hsa-miR-553       | 0.1     | 0.1     | 0.1     | 0.1     |
| hsa-miR-554       | 0.1     | 0.1     | 0.1     | 0.1     |
| hsa-miR-555       | 0.1     | 0.1     | 0.1     | 0.1     |
| hsa-miR-556-3p    | 0.1     | 0.1     | 0.1     | 0.1     |
| hsa-miR-556-5p    | 0.1     | 0.1     | 0.1     | 0.1     |
| hsa-miR-557       | 0.1     | 0.1     | 0.1     | 0.1     |
| hsa-miR-5571-3p   | 0.1     | 0.1     | 0.1     | 0.1     |
| hsa-miR-5571-5p   | 0.1     | 0.1     | 0.1     | 0.1     |
| hsa-miR-5572      | 0.1     | 0.1     | 0.1     | 0.1     |
| hsa-miR-5579-3p   | 0.1     | 0.1     | 0.1     | 0.1     |
| hsa-miR-5579-5p   | 0.1     | 0.1     | 0.1     | 0.1     |
| hsa-miR-558       | 0.1     | 0.1     | 0.1     | 0.1     |
| hsa-miR-5580-3p   | 0.1     | 0.1     | 0.1     | 0.1     |
| hsa-miR-5580-5p   | 0.1     | 0.1     | 0.1     | 0.1     |
| hsa-miR-5581-3p   | 0.1     | 0.1     | 0.1     | 0.1     |
| hsa-miR-5581-5p   | 4.68948 | 4.49703 | 4.59388 | 5.61856 |
| hsa-miR-5582-3p   | 0.1     | 0.1     | 0.1     | 0.1     |
| hsa-miR-5582-5p   | 0.1     | 0.1     | 0.1     | 0.1     |
| hsa-miR-5583-3p   | 0.1     | 0.1     | 0.1     | 0.1     |
| hsa-miR-5583-5p   | 0.1     | 0.1     | 0.1     | 0.1     |
| hsa-miR-5584-3p   | 0.1     | 0.1     | 0.1     | 0.1     |
| hsa-miR-5584-5p   | 0.1     | 0.1     | 0.1     | 0.1     |
| hsa-miR-5585-3p   | 1.88423 | 0.1     | 0.1     | 0.1     |
| hsa-miR-5585-5p   | 0.1     | 0.1     | 0.1     | 0.1     |
| hsa-miR-5586-3p   | 0.1     | 0.1     | 0.1     | 0.1     |
| hsa-miR-5586-5p   | 0.1     | 0.1     | 0.1     | 0.1     |
| hsa-miR-5587-3p   | 0.1     | 0.1     | 0.1     | 0.1     |
| hsa-miR-5587-5p   | 0.1     | 0.1     | 0.1     | 0.1     |
| hsa-miR-5588-3p   | 0.1     | 0.1     | 0.1     | 0.1     |
| hsa-miR-5588-5p   | 0.1     | 0.1     | 0.1     | 0.1     |
| hsa-miR-5589-3p   | 0.1     | 0.1     | 0.1     | 0.1     |
| hsa-miR-5589-5p   | 0.1     | 0.1     | 0.1     | 0.1     |
| hsa-miR-559       | 0.1     | 0.1     | 0.1     | 0.1     |
| hsa-miR-5590-3p   | 0.1     | 0.1     | 0.1     | 0.1     |
| hsa-miR-5590-5p   | 0.1     | 0.1     | 0.1     | 0.1     |
| hsa-miR-5591-3p   | 0.1     | 0.1     | 0.1     | 0.1     |
| hsa-miR-5591-5p   | 0.1     | 0.1     | 0.1     | 0.1     |
| hsa-miR-561-3p    | 0.1     | 0.1     | 0.1     | 0.1     |
| hsa-miR-561-5p    | 0.1     | 0.1     | 0.1     | 0.1     |
| hsa-miR-562       | 0.1     | 0.1     | 0.1     | 0.1     |
| hsa-miR-563       | 0.1     | 0.1     | 0.1     | 0.1     |
| hsa-miR-564       | 0.1     | 0.1     | 1.14914 | 0.1     |
| hsa-miR-566       | 0.1     | 0.1     | 0.1     | 0.1     |

|                 |         |         |         |         |
|-----------------|---------|---------|---------|---------|
| hsa-miR-567     | 0.1     | 0.1     | 0.1     | 0.1     |
| hsa-miR-568     | 0.1     | 0.1     | 0.1     | 0.1     |
| hsa-miR-5680    | 0.1     | 0.1     | 0.1     | 0.1     |
| hsa-miR-5681a   | 0.1     | 0.1     | 0.1     | 0.1     |
| hsa-miR-5681b   | 0.1     | 0.1     | 0.1     | 0.1     |
| hsa-miR-5682    | 0.1     | 0.1     | 0.1     | 0.1     |
| hsa-miR-5683    | 0.1     | 0.1     | 0.1     | 0.1     |
| hsa-miR-5684    | 0.1     | 0.1     | 2.83431 | 0.1     |
| hsa-miR-5685    | 0.1     | 0.1     | 0.1     | 0.1     |
| hsa-miR-5687    | 0.1     | 0.1     | 0.1     | 0.1     |
| hsa-miR-5688    | 0.1     | 0.1     | 0.1     | 0.1     |
| hsa-miR-5689    | 0.1     | 0.1     | 0.1     | 0.1     |
| hsa-miR-569     | 0.1     | 0.1     | 0.1     | 0.1     |
| hsa-miR-5690    | 0.1     | 0.1     | 0.1     | 0.1     |
| hsa-miR-5691    | 0.1     | 0.1     | 0.1     | 0.1     |
| hsa-miR-5692a   | 0.1     | 0.1     | 0.1     | 0.1     |
| hsa-miR-5692b   | 0.1     | 0.1     | 0.1     | 0.1     |
| hsa-miR-5692c   | 0.1     | 0.1     | 0.1     | 0.1     |
| hsa-miR-5693    | 0.1     | 0.1     | 0.1     | 0.1     |
| hsa-miR-5694    | 0.1     | 0.1     | 0.1     | 0.1     |
| hsa-miR-5695    | 0.1     | 0.1     | 0.1     | 0.1     |
| hsa-miR-5696    | 0.1     | 0.1     | 0.1     | 0.1     |
| hsa-miR-5697    | 0.1     | 0.1     | 0.1     | 0.1     |
| hsa-miR-5698    | 0.1     | 0.1     | 0.1     | 0.1     |
| hsa-miR-5699-3p | 0.1     | 0.1     | 0.1     | 0.1     |
| hsa-miR-5699-5p | 0.1     | 0.1     | 0.1     | 0.1     |
| hsa-miR-5700    | 0.1     | 0.1     | 0.1     | 0.1     |
| hsa-miR-5701    | 0.1     | 0.1     | 0.1     | 0.1     |
| hsa-miR-5702    | 0.1     | 0.1     | 0.1     | 0.1     |
| hsa-miR-5703    | 0.1     | 19.1952 | 28.6958 | 10.5272 |
| hsa-miR-570-3p  | 0.1     | 0.1     | 0.1     | 0.1     |
| hsa-miR-5704    | 0.1     | 0.1     | 0.1     | 0.1     |
| hsa-miR-5705    | 0.1     | 0.1     | 0.1     | 0.1     |
| hsa-miR-5706    | 0.1     | 0.1     | 0.1     | 0.1     |
| hsa-miR-5707    | 0.1     | 0.1     | 0.1     | 0.1     |
| hsa-miR-5708    | 0.1     | 0.1     | 0.1     | 0.1     |
| hsa-miR-571     | 3.33667 | 0.1     | 0.1     | 0.1     |
| hsa-miR-572     | 8.1385  | 8.27918 | 10.3478 | 7.87671 |
| hsa-miR-573     | 0.1     | 0.1     | 0.1     | 0.1     |
| hsa-miR-5739    | 52.766  | 75.61   | 83.4647 | 89.115  |
| hsa-miR-574-3p  | 0.1     | 0.1     | 0.1     | 0.1     |
| hsa-miR-574-5p  | 9.70208 | 13.2147 | 14.5463 | 12.1607 |
| hsa-miR-575     | 5.46836 | 9.19842 | 6.79499 | 7.31572 |
| hsa-miR-576-3p  | 0.1     | 0.1     | 0.1     | 0.1     |
| hsa-miR-576-5p  | 0.1     | 0.1     | 0.1     | 0.1     |
| hsa-miR-577     | 0.1     | 0.1     | 0.1     | 0.1     |
| hsa-miR-578     | 0.1     | 0.1     | 0.1     | 0.1     |
| hsa-miR-5787    | 3.98055 | 14.0863 | 22.9307 | 7.28632 |
| hsa-miR-579-3p  | 0.1     | 0.1     | 0.1     | 0.1     |
| hsa-miR-579-5p  | 0.1     | 0.1     | 0.1     | 0.1     |
| hsa-miR-580-3p  | 0.1     | 0.1     | 0.1     | 0.1     |
| hsa-miR-580-5p  | 0.1     | 0.1     | 0.1     | 0.1     |
| hsa-miR-581     | 0.1     | 0.1     | 0.1     | 0.1     |

|                |         |         |         |         |
|----------------|---------|---------|---------|---------|
| hsa-miR-582-3p | 0.1     | 1.2672  | 0.1     | 1.06934 |
| hsa-miR-582-5p | 32.471  | 58.5791 | 14.3979 | 54.2365 |
| hsa-miR-583    | 0.1     | 0.1     | 0.1     | 0.1     |
| hsa-miR-584-3p | 0.1     | 0.1     | 0.1     | 0.1     |
| hsa-miR-584-5p | 0.1     | 0.1     | 5.3346  | 0.1     |
| hsa-miR-585-3p | 0.1     | 0.1     | 0.1     | 0.1     |
| hsa-miR-585-5p | 0.1     | 0.1     | 0.1     | 0.1     |
| hsa-miR-586    | 0.1     | 0.1     | 0.1     | 0.1     |
| hsa-miR-587    | 0.1     | 0.1     | 0.1     | 0.1     |
| hsa-miR-588    | 0.1     | 0.1     | 0.1     | 0.1     |
| hsa-miR-589-3p | 0.1     | 0.1     | 0.1     | 0.1     |
| hsa-miR-589-5p | 0.1     | 0.1     | 0.1     | 0.1     |
| hsa-miR-590-3p | 0.1     | 0.1     | 0.1     | 0.1     |
| hsa-miR-590-5p | 8.90021 | 7.86356 | 4.78255 | 9.03291 |
| hsa-miR-591    | 0.1     | 0.1     | 0.1     | 0.1     |
| hsa-miR-592    | 0.1     | 0.1     | 0.1     | 0.1     |
| hsa-miR-593-3p | 0.1     | 0.1     | 0.1     | 0.1     |
| hsa-miR-593-5p | 0.1     | 0.1     | 0.1     | 0.1     |
| hsa-miR-595    | 0.1     | 0.1     | 0.1     | 0.1     |
| hsa-miR-596    | 0.1     | 0.1     | 0.1     | 0.1     |
| hsa-miR-597-3p | 0.1     | 0.1     | 0.1     | 0.1     |
| hsa-miR-597-5p | 0.1     | 0.1     | 0.1     | 0.1     |
| hsa-miR-598-3p | 0.1     | 0.1     | 0.1     | 0.1     |
| hsa-miR-598-5p | 0.1     | 0.1     | 0.1     | 0.1     |
| hsa-miR-599    | 0.1     | 0.1     | 0.1     | 0.1     |
| hsa-miR-600    | 0.1     | 0.1     | 0.1     | 0.1     |
| hsa-miR-601    | 0.1     | 0.1     | 0.1     | 0.1     |
| hsa-miR-602    | 0.1     | 0.1     | 0.1     | 0.1     |
| hsa-miR-603    | 0.1     | 0.1     | 0.1     | 0.1     |
| hsa-miR-604    | 0.1     | 0.1     | 0.1     | 0.1     |
| hsa-miR-605-3p | 0.1     | 0.1     | 0.1     | 0.1     |
| hsa-miR-605-5p | 0.1     | 0.1     | 0.1     | 0.1     |
| hsa-miR-606    | 0.1     | 0.1     | 0.1     | 0.1     |
| hsa-miR-6068   | 18.0932 | 17.7981 | 23.4747 | 15.1915 |
| hsa-miR-6069   | 0.1     | 0.1     | 0.1     | 0.1     |
| hsa-miR-607    | 0.1     | 0.1     | 0.1     | 0.1     |
| hsa-miR-6070   | 0.1     | 0.1     | 0.1     | 0.1     |
| hsa-miR-6071   | 0.1     | 0.1     | 0.1     | 0.1     |
| hsa-miR-6072   | 0.1     | 0.1     | 0.1     | 0.1     |
| hsa-miR-6073   | 0.1     | 0.1     | 0.1     | 0.1     |
| hsa-miR-6074   | 0.1     | 0.1     | 0.1     | 0.1     |
| hsa-miR-6075   | 0.1     | 0.1     | 0.1     | 0.1     |
| hsa-miR-6076   | 0.1     | 0.1     | 6.00934 | 0.1     |
| hsa-miR-6077   | 0.1     | 0.1     | 0.1     | 0.1     |
| hsa-miR-6078   | 0.1     | 0.1     | 0.1     | 0.1     |
| hsa-miR-6079   | 0.1     | 0.1     | 0.1     | 0.1     |
| hsa-miR-608    | 0.1     | 0.1     | 0.1     | 0.1     |
| hsa-miR-6080   | 0.1     | 0.1     | 0.1     | 0.1     |
| hsa-miR-6081   | 0.1     | 0.1     | 0.1     | 0.1     |
| hsa-miR-6082   | 0.1     | 0.1     | 0.1     | 0.1     |
| hsa-miR-6083   | 0.1     | 0.1     | 0.1     | 0.1     |
| hsa-miR-6084   | 0.1     | 0.1     | 0.1     | 0.1     |
| hsa-miR-6085   | 28.7686 | 52.7304 | 52.6528 | 64.9587 |

|                |          |         |         |         |
|----------------|----------|---------|---------|---------|
| hsa-miR-6086   | 0.1      | 0.1     | 0.1     | 0.1     |
| hsa-miR-6087   | 145.568  | 131.632 | 190.81  | 102.637 |
| hsa-miR-6088   | 38.1516  | 34.4155 | 43.7807 | 25.3721 |
| hsa-miR-6089   | 148.095  | 162.352 | 156.172 | 127.75  |
| hsa-miR-609    | 0.1      | 0.1     | 0.1     | 0.1     |
| hsa-miR-6090   | 65.8778  | 64.9762 | 50.9652 | 44.1193 |
| hsa-miR-610    | 0.1      | 0.1     | 0.1     | 0.1     |
| hsa-miR-611    | 0.1      | 0.1     | 0.1     | 0.1     |
| hsa-miR-612    | 0.1      | 0.1     | 0.1     | 0.1     |
| hsa-miR-6124   | 8.20401  | 9.16464 | 9.71086 | 7.64311 |
| hsa-miR-6125   | 71.0958  | 73.2403 | 79.0395 | 63.1061 |
| hsa-miR-6126   | 3.0884   | 3.29037 | 3.65924 | 2.05691 |
| hsa-miR-6127   | 64.3912  | 69.5292 | 58.7127 | 78.1359 |
| hsa-miR-6128   | 0.1      | 0.1     | 0.1     | 0.1     |
| hsa-miR-6129   | 0.1      | 0.1     | 0.1     | 0.1     |
| hsa-miR-613    | 0.1      | 0.1     | 0.1     | 0.1     |
| hsa-miR-6130   | 0.1      | 0.1     | 0.1     | 0.1     |
| hsa-miR-6131   | 10.5961  | 11.1303 | 9.71072 | 12.7818 |
| hsa-miR-6132   | 15.9411  | 18.5858 | 16.1878 | 17.1183 |
| hsa-miR-6133   | 0.1      | 0.1     | 0.1     | 0.1     |
| hsa-miR-6134   | 0.1      | 0.1     | 0.1     | 0.1     |
| hsa-miR-614    | 0.1      | 0.1     | 0.1     | 0.1     |
| hsa-miR-615-3p | 0.1      | 0.1     | 0.1     | 0.1     |
| hsa-miR-615-5p | 0.1      | 0.1     | 0.1     | 0.1     |
| hsa-miR-616-3p | 0.1      | 0.1     | 0.1     | 0.1     |
| hsa-miR-6165   | 23.301   | 37.4482 | 42.3481 | 45.9841 |
| hsa-miR-616-5p | 0.1      | 0.1     | 0.1     | 0.1     |
| hsa-miR-617    | 0.1      | 0.1     | 0.1     | 0.1     |
| hsa-miR-618    | 0.1      | 0.1     | 0.1     | 0.1     |
| hsa-miR-619-3p | 0.1      | 0.1     | 0.1     | 0.1     |
| hsa-miR-619-5p | 0.1      | 0.1     | 0.1     | 0.1     |
| hsa-miR-620    | 0.1      | 0.1     | 0.1     | 0.1     |
| hsa-miR-621    | 0.1      | 0.1     | 0.1     | 0.1     |
| hsa-miR-622    | 0.1      | 0.1     | 0.1     | 0.1     |
| hsa-miR-623    | 0.1      | 0.1     | 0.1     | 0.1     |
| hsa-miR-624-3p | 0.1      | 0.1     | 0.1     | 0.1     |
| hsa-miR-624-5p | 0.1      | 0.1     | 0.1     | 0.1     |
| hsa-miR-625-3p | 0.1      | 0.1     | 0.1     | 0.1     |
| hsa-miR-625-5p | 0.1      | 0.1     | 0.1     | 0.1     |
| hsa-miR-626    | 0.1      | 0.1     | 0.1     | 0.1     |
| hsa-miR-627-3p | 0.1      | 0.1     | 0.1     | 0.1     |
| hsa-miR-627-5p | 0.1      | 0.1     | 0.1     | 0.1     |
| hsa-miR-628-3p | 0.1      | 0.1     | 0.1     | 0.1     |
| hsa-miR-628-5p | 0.1      | 0.1     | 0.1     | 0.1     |
| hsa-miR-629-3p | 0.1      | 0.1     | 0.1     | 0.1     |
| hsa-miR-629-5p | 0.843699 | 0.1     | 0.1     | 0.1     |
| hsa-miR-630    | 4.2459   | 33.1959 | 46.3747 | 18.3226 |
| hsa-miR-631    | 0.1      | 0.1     | 0.1     | 0.1     |
| hsa-miR-632    | 0.1      | 0.1     | 0.1     | 0.1     |
| hsa-miR-633    | 0.1      | 0.1     | 0.1     | 0.1     |
| hsa-miR-634    | 0.1      | 0.1     | 0.1     | 0.1     |
| hsa-miR-635    | 0.1      | 0.1     | 0.1     | 0.1     |
| hsa-miR-636    | 0.1      | 0.1     | 0.1     | 0.1     |

|                  |          |         |         |         |
|------------------|----------|---------|---------|---------|
| hsa-miR-637      | 0.1      | 0.1     | 0.1     | 0.1     |
| hsa-miR-638      | 32.2143  | 36.8139 | 44.0704 | 33.7565 |
| hsa-miR-639      | 0.1      | 0.1     | 0.1     | 0.1     |
| hsa-miR-640      | 0.1      | 0.1     | 0.1     | 0.1     |
| hsa-miR-641      | 0.1      | 0.1     | 0.1     | 0.1     |
| hsa-miR-642a-3p  | 29.4801  | 34.1902 | 40.9389 | 25.8886 |
| hsa-miR-642a-5p  | 0.1      | 0.1     | 0.1     | 0.1     |
| hsa-miR-642b-3p  | 8.81119  | 9.20228 | 7.61081 | 6.3874  |
| hsa-miR-642b-5p  | 0.1      | 0.1     | 0.1     | 0.1     |
| hsa-miR-643      | 0.1      | 0.1     | 0.1     | 0.1     |
| hsa-miR-644a     | 0.1      | 0.1     | 0.1     | 0.1     |
| hsa-miR-645      | 0.1      | 0.1     | 0.1     | 0.1     |
| hsa-miR-646      | 0.1      | 0.1     | 0.1     | 0.1     |
| hsa-miR-647      | 0.1      | 0.1     | 0.1     | 0.1     |
| hsa-miR-648      | 0.1      | 0.1     | 0.1     | 0.1     |
| hsa-miR-649      | 0.1      | 0.1     | 0.1     | 0.1     |
| hsa-miR-6499-3p  | 0.1      | 0.1     | 0.1     | 0.1     |
| hsa-miR-6499-5p  | 0.1      | 0.1     | 0.1     | 0.1     |
| hsa-miR-650      | 0.1      | 0.1     | 0.1     | 0.1     |
| hsa-miR-6500-3p  | 0.1      | 0.1     | 0.1     | 0.1     |
| hsa-miR-6500-5p  | 0.1      | 0.1     | 0.1     | 0.1     |
| hsa-miR-6501-3p  | 0.1      | 0.1     | 0.1     | 0.1     |
| hsa-miR-6501-5p  | 0.1      | 0.1     | 0.1     | 0.1     |
| hsa-miR-6502-3p  | 0.1      | 0.1     | 0.1     | 0.1     |
| hsa-miR-6502-5p  | 0.1      | 0.1     | 0.1     | 0.1     |
| hsa-miR-6503-3p  | 0.1      | 0.1     | 0.1     | 0.1     |
| hsa-miR-6503-5p  | 0.1      | 0.1     | 0.1     | 0.1     |
| hsa-miR-6504-3p  | 0.1      | 0.1     | 0.1     | 0.1     |
| hsa-miR-6504-5p  | 0.1      | 0.1     | 0.1     | 0.1     |
| hsa-miR-6505-3p  | 0.1      | 0.1     | 0.1     | 0.1     |
| hsa-miR-6505-5p  | 0.1      | 0.1     | 0.1     | 0.1     |
| hsa-miR-6506-3p  | 0.1      | 0.1     | 0.1     | 0.1     |
| hsa-miR-6506-5p  | 0.1      | 0.1     | 0.1     | 0.1     |
| hsa-miR-6507-3p  | 1.60529  | 0.1     | 0.1     | 0.1     |
| hsa-miR-6507-5p  | 0.1      | 0.1     | 0.1     | 0.1     |
| hsa-miR-6508-3p  | 0.1      | 0.1     | 0.1     | 0.1     |
| hsa-miR-6508-5p  | 0.1      | 0.1     | 0.1     | 0.1     |
| hsa-miR-6509-3p  | 0.1      | 0.1     | 0.1     | 0.1     |
| hsa-miR-6509-5p  | 0.1      | 0.1     | 0.1     | 0.1     |
| hsa-miR-6510-3p  | 0.1      | 0.1     | 0.1     | 0.1     |
| hsa-miR-6510-5p  | 2.35477  | 5.46326 | 2.58406 | 2.49827 |
| hsa-miR-6511a-3p | 0.1      | 0.1     | 0.1     | 0.1     |
| hsa-miR-6511a-5p | 0.1      | 0.1     | 0.1     | 0.1     |
| hsa-miR-6511b-3p | 0.1      | 0.1     | 0.1     | 0.1     |
| hsa-miR-6511b-5p | 0.1      | 0.1     | 0.1     | 0.1     |
| hsa-miR-6512-3p  | 0.1      | 0.1     | 0.1     | 0.1     |
| hsa-miR-6512-5p  | 0.923357 | 0.1     | 0.1     | 0.1     |
| hsa-miR-6513-3p  | 0.1      | 0.1     | 0.1     | 0.1     |
| hsa-miR-6513-5p  | 0.1      | 0.1     | 0.1     | 0.1     |
| hsa-miR-651-3p   | 0.1      | 0.1     | 0.1     | 0.1     |
| hsa-miR-6514-3p  | 0.1      | 0.1     | 0.1     | 0.1     |
| hsa-miR-6514-5p  | 0.1      | 0.1     | 0.1     | 0.1     |
| hsa-miR-6515-3p  | 0.1      | 0.1     | 0.1     | 0.1     |

|                  |         |         |         |         |
|------------------|---------|---------|---------|---------|
| hsa-miR-6515-5p  | 0.1     | 0.1     | 0.1     | 0.1     |
| hsa-miR-651-5p   | 0.1     | 0.1     | 0.1     | 0.1     |
| hsa-miR-6516-3p  | 4.56841 | 3.86222 | 4.0593  | 3.31475 |
| hsa-miR-6516-5p  | 0.1     | 0.1     | 0.1     | 0.1     |
| hsa-miR-652-3p   | 3.08734 | 1.91349 | 2.84721 | 2.28693 |
| hsa-miR-652-5p   | 0.1     | 0.1     | 0.1     | 0.1     |
| hsa-miR-653-3p   | 0.1     | 0.1     | 0.1     | 0.1     |
| hsa-miR-653-5p   | 0.1     | 0.1     | 0.1     | 0.1     |
| hsa-miR-654-3p   | 0.1     | 2.19932 | 0.1     | 2.58348 |
| hsa-miR-654-5p   | 0.1     | 0.1     | 0.1     | 0.1     |
| hsa-miR-655-3p   | 0.1     | 0.1     | 0.1     | 0.1     |
| hsa-miR-655-5p   | 0.1     | 0.1     | 0.1     | 0.1     |
| hsa-miR-656-3p   | 0.1     | 0.1     | 0.1     | 0.1     |
| hsa-miR-656-5p   | 0.1     | 0.1     | 0.1     | 0.1     |
| hsa-miR-657      | 0.1     | 0.1     | 0.1     | 0.1     |
| hsa-miR-658      | 0.1     | 0.1     | 1.94301 | 0.1     |
| hsa-miR-659-3p   | 0.1     | 0.1     | 0.1     | 0.1     |
| hsa-miR-659-5p   | 0.1     | 0.1     | 0.1     | 0.1     |
| hsa-miR-660-3p   | 0.1     | 0.1     | 0.1     | 0.1     |
| hsa-miR-660-5p   | 3.10239 | 2.69887 | 3.06968 | 3.76723 |
| hsa-miR-661      | 0.1     | 0.1     | 0.1     | 0.1     |
| hsa-miR-662      | 0.1     | 0.1     | 0.1     | 0.1     |
| hsa-miR-663a     | 0.1     | 0.1     | 0.1     | 0.1     |
| hsa-miR-663b     | 0.1     | 0.1     | 0.1     | 0.1     |
| hsa-miR-664a-3p  | 0.1     | 0.1     | 0.1     | 0.1     |
| hsa-miR-664a-5p  | 0.1     | 0.1     | 0.1     | 0.1     |
| hsa-miR-664b-3p  | 4.23697 | 5.52005 | 5.17148 | 4.59675 |
| hsa-miR-664b-5p  | 0.1     | 0.1     | 0.1     | 0.1     |
| hsa-miR-665      | 0.1     | 0.1     | 0.1     | 0.1     |
| hsa-miR-668-3p   | 0.1     | 0.1     | 0.1     | 0.1     |
| hsa-miR-668-5p   | 0.1     | 0.1     | 0.1     | 0.1     |
| hsa-miR-670-3p   | 0.1     | 0.1     | 0.1     | 0.1     |
| hsa-miR-670-5p   | 0.1     | 0.1     | 0.1     | 0.1     |
| hsa-miR-671-3p   | 0.1     | 0.1     | 0.1     | 0.1     |
| hsa-miR-6715a-3p | 0.1     | 0.1     | 0.1     | 0.1     |
| hsa-miR-6715b-3p | 0.1     | 0.1     | 0.1     | 0.1     |
| hsa-miR-6715b-5p | 0.1     | 0.1     | 0.1     | 0.1     |
| hsa-miR-671-5p   | 0.1     | 0.1     | 0.1     | 0.1     |
| hsa-miR-6716-3p  | 0.1     | 4.73873 | 0.1     | 1.62169 |
| hsa-miR-6716-5p  | 0.1     | 0.1     | 0.1     | 0.1     |
| hsa-miR-6717-5p  | 15.117  | 13.8164 | 14.1111 | 16.1716 |
| hsa-miR-6718-5p  | 0.1     | 0.1     | 0.1     | 0.1     |
| hsa-miR-6719-3p  | 0.1     | 0.1     | 0.1     | 0.1     |
| hsa-miR-6720-3p  | 0.1     | 0.1     | 0.1     | 0.1     |
| hsa-miR-6720-5p  | 0.1     | 0.1     | 0.1     | 0.1     |
| hsa-miR-6721-5p  | 0.1     | 0.1     | 0.1     | 0.1     |
| hsa-miR-6722-3p  | 0.1     | 0.1     | 0.1     | 0.1     |
| hsa-miR-6722-5p  | 0.1     | 0.1     | 0.1     | 0.1     |
| hsa-miR-6723-5p  | 0.1     | 0.1     | 0.1     | 0.1     |
| hsa-miR-6724-5p  | 7.96921 | 7.89748 | 8.52049 | 5.79416 |
| hsa-miR-6726-3p  | 0.1     | 0.1     | 0.1     | 0.1     |
| hsa-miR-6726-5p  | 0.1     | 0.1     | 3.06777 | 0.1     |
| hsa-miR-6727-3p  | 0.1     | 0.1     | 0.1     | 0.1     |



|                 |         |         |         |         |
|-----------------|---------|---------|---------|---------|
| hsa-miR-6727-5p | 0.1     | 0.1     | 0.1     | 0.1     |
| hsa-miR-6728-3p | 0.1     | 0.1     | 0.1     | 0.1     |
| hsa-miR-6728-5p | 10.5431 | 7.94095 | 12.9309 | 4.63499 |
| hsa-miR-6729-3p | 0.1     | 0.1     | 0.1     | 0.1     |
| hsa-miR-6729-5p | 0.1     | 0.1     | 0.1     | 0.1     |
| hsa-miR-6730-3p | 0.1     | 0.1     | 0.1     | 0.1     |
| hsa-miR-6730-5p | 0.1     | 0.1     | 0.1     | 0.1     |
| hsa-miR-6731-3p | 0.1     | 0.1     | 0.1     | 0.1     |
| hsa-miR-6731-5p | 0.1     | 0.1     | 0.1     | 0.1     |
| hsa-miR-6732-3p | 0.1     | 0.1     | 0.1     | 0.1     |
| hsa-miR-6732-5p | 0.1     | 0.1     | 0.1     | 0.1     |
| hsa-miR-6733-3p | 0.1     | 0.1     | 0.1     | 0.1     |
| hsa-miR-6733-5p | 0.1     | 0.1     | 0.1     | 0.1     |
| hsa-miR-6734-3p | 0.1     | 0.1     | 0.1     | 0.1     |
| hsa-miR-6734-5p | 6.60829 | 6.6605  | 6.29247 | 6.69222 |
| hsa-miR-6735-3p | 0.1     | 0.1     | 0.1     | 0.1     |
| hsa-miR-6735-5p | 0.1     | 0.1     | 0.1     | 0.1     |
| hsa-miR-6736-3p | 0.1     | 0.1     | 0.1     | 0.1     |
| hsa-miR-6736-5p | 0.1     | 0.1     | 0.1     | 0.1     |
| hsa-miR-6737-3p | 0.1     | 0.1     | 0.1     | 0.1     |
| hsa-miR-6737-5p | 0.1     | 0.1     | 0.1     | 0.1     |
| hsa-miR-6738-3p | 0.1     | 0.1     | 0.1     | 0.1     |
| hsa-miR-6738-5p | 0.1     | 0.1     | 0.1     | 0.1     |
| hsa-miR-6739-3p | 0.1     | 0.1     | 0.1     | 0.1     |
| hsa-miR-6739-5p | 0.1     | 0.1     | 0.1     | 0.1     |
| hsa-miR-6740-3p | 0.1     | 0.1     | 0.1     | 0.1     |
| hsa-miR-6740-5p | 19.7704 | 20.3379 | 18.7383 | 21.0278 |
| hsa-miR-6741-3p | 0.1     | 0.1     | 0.1     | 0.1     |
| hsa-miR-6741-5p | 0.1     | 0.1     | 0.1     | 0.1     |
| hsa-miR-6742-3p | 0.1     | 0.1     | 0.1     | 0.1     |
| hsa-miR-6742-5p | 0.1     | 0.1     | 0.1     | 0.1     |
| hsa-miR-6743-3p | 0.1     | 0.1     | 0.1     | 0.1     |
| hsa-miR-6743-5p | 0.1     | 0.1     | 0.1     | 0.1     |
| hsa-miR-6744-3p | 0.1     | 0.1     | 0.1     | 0.1     |
| hsa-miR-6744-5p | 0.1     | 0.1     | 0.1     | 0.1     |
| hsa-miR-6745    | 0.1     | 0.1     | 0.1     | 0.1     |
| hsa-miR-6746-3p | 0.1     | 0.1     | 0.1     | 0.1     |
| hsa-miR-6746-5p | 0.1     | 0.1     | 0.1     | 0.1     |
| hsa-miR-6747-3p | 0.1     | 0.1     | 0.1     | 0.1     |
| hsa-miR-6747-5p | 0.1     | 0.1     | 0.1     | 0.1     |
| hsa-miR-6748-3p | 0.1     | 0.1     | 0.1     | 0.1     |
| hsa-miR-6748-5p | 0.1     | 0.1     | 0.1     | 0.1     |
| hsa-miR-6749-3p | 0.1     | 0.1     | 0.1     | 0.1     |
| hsa-miR-6749-5p | 23.5086 | 31.4197 | 34.7311 | 32.6838 |
| hsa-miR-6750-3p | 0.1     | 0.1     | 0.1     | 0.1     |
| hsa-miR-6750-5p | 0.1     | 0.1     | 0.1     | 0.1     |
| hsa-miR-6751-3p | 0.1     | 0.1     | 0.1     | 0.1     |
| hsa-miR-6751-5p | 0.1     | 0.1     | 0.1     | 0.1     |
| hsa-miR-6752-3p | 0.1     | 0.1     | 0.1     | 0.1     |
| hsa-miR-6752-5p | 1.8281  | 0.1     | 2.05327 | 0.1     |
| hsa-miR-6753-3p | 0.1     | 0.1     | 0.1     | 0.1     |
| hsa-miR-6753-5p | 0.1     | 0.1     | 0.1     | 0.1     |
| hsa-miR-675-3p  | 0.1     | 0.1     | 0.1     | 0.1     |

|                  |         |         |         |         |
|------------------|---------|---------|---------|---------|
| hsa-miR-6754-3p  | 0.1     | 0.1     | 0.1     | 0.1     |
| hsa-miR-6754-5p  | 0.1     | 0.1     | 0.1     | 0.1     |
| hsa-miR-6755-3p  | 0.1     | 0.1     | 0.1     | 0.1     |
| hsa-miR-6755-5p  | 0.1     | 0.1     | 0.1     | 0.1     |
| hsa-miR-675-5p   | 0.1     | 0.1     | 0.1     | 0.1     |
| hsa-miR-6756-3p  | 0.1     | 0.1     | 0.1     | 0.1     |
| hsa-miR-6756-5p  | 0.1     | 0.1     | 0.1     | 0.1     |
| hsa-miR-6757-3p  | 0.1     | 0.1     | 0.1     | 0.1     |
| hsa-miR-6757-5p  | 0.1     | 0.1     | 2.1924  | 0.1     |
| hsa-miR-6758-3p  | 0.1     | 0.1     | 0.1     | 0.1     |
| hsa-miR-6758-5p  | 0.1     | 0.1     | 0.1     | 0.1     |
| hsa-miR-6759-3p  | 0.1     | 0.1     | 0.1     | 0.1     |
| hsa-miR-6759-5p  | 0.1     | 0.1     | 0.1     | 0.1     |
| hsa-miR-6760-3p  | 0.1     | 0.1     | 0.1     | 0.1     |
| hsa-miR-6760-5p  | 0.1     | 0.1     | 0.1     | 0.1     |
| hsa-miR-6761-3p  | 0.1     | 0.1     | 0.1     | 0.1     |
| hsa-miR-6761-5p  | 0.1     | 0.1     | 0.1     | 0.1     |
| hsa-miR-6762-3p  | 0.1     | 0.1     | 0.1     | 0.1     |
| hsa-miR-6762-5p  | 0.1     | 0.1     | 0.1     | 0.1     |
| hsa-miR-6763-3p  | 0.1     | 0.1     | 0.1     | 0.1     |
| hsa-miR-6763-5p  | 10.1176 | 12.9018 | 15.2572 | 14.595  |
| hsa-miR-676-3p   | 0.1     | 0.1     | 0.1     | 0.1     |
| hsa-miR-6764-3p  | 0.1     | 0.1     | 0.1     | 0.1     |
| hsa-miR-6764-5p  | 0.1     | 0.1     | 0.1     | 0.1     |
| hsa-miR-6765-3p  | 0.1     | 0.1     | 0.1     | 0.1     |
| hsa-miR-6765-5p  | 0.1     | 0.1     | 0.1     | 0.1     |
| hsa-miR-676-5p   | 0.1     | 0.1     | 0.1     | 0.1     |
| hsa-miR-6766-3p  | 0.1     | 0.1     | 0.1     | 0.1     |
| hsa-miR-6766-5p  | 0.1     | 0.1     | 0.1     | 0.1     |
| hsa-miR-6767-3p  | 0.1     | 0.1     | 0.1     | 0.1     |
| hsa-miR-6767-5p  | 5.1794  | 5.49848 | 5.32431 | 5.31304 |
| hsa-miR-6768-3p  | 0.1     | 0.1     | 0.1     | 0.1     |
| hsa-miR-6768-5p  | 0.1     | 0.1     | 0.1     | 0.1     |
| hsa-miR-6769a-3p | 0.1     | 0.1     | 0.1     | 0.1     |
| hsa-miR-6769a-5p | 0.1     | 0.1     | 0.1     | 0.1     |
| hsa-miR-6769b-3p | 0.1     | 0.1     | 0.1     | 0.1     |
| hsa-miR-6769b-5p | 5.08466 | 6.70452 | 5.97443 | 5.42931 |
| hsa-miR-6770-3p  | 0.1     | 0.1     | 0.1     | 0.1     |
| hsa-miR-6770-5p  | 0.1     | 0.1     | 0.1     | 0.1     |
| hsa-miR-6771-3p  | 0.1     | 0.1     | 0.1     | 0.1     |
| hsa-miR-6771-5p  | 0.1     | 0.1     | 0.1     | 0.1     |
| hsa-miR-6772-3p  | 0.1     | 0.1     | 0.1     | 0.1     |
| hsa-miR-6772-5p  | 0.1     | 0.1     | 0.1     | 0.1     |
| hsa-miR-6773-3p  | 0.1     | 0.1     | 0.1     | 0.1     |
| hsa-miR-6773-5p  | 0.1     | 0.1     | 0.1     | 0.1     |
| hsa-miR-6774-3p  | 0.1     | 0.1     | 0.1     | 0.1     |
| hsa-miR-6774-5p  | 0.1     | 0.1     | 0.1     | 0.1     |
| hsa-miR-6775-3p  | 0.1     | 0.1     | 0.1     | 0.1     |
| hsa-miR-6775-5p  | 0.1     | 0.1     | 2.3206  | 0.1     |
| hsa-miR-6776-3p  | 0.1     | 0.1     | 0.1     | 0.1     |
| hsa-miR-6776-5p  | 0.1     | 0.1     | 0.1     | 0.1     |
| hsa-miR-6777-3p  | 0.1     | 0.1     | 0.1     | 0.1     |
| hsa-miR-6777-5p  | 0.1     | 0.1     | 0.1     | 0.1     |

|                  |         |         |         |         |
|------------------|---------|---------|---------|---------|
| hsa-miR-6778-3p  | 0.1     | 0.1     | 0.1     | 0.1     |
| hsa-miR-6778-5p  | 0.1     | 0.1     | 0.1     | 0.1     |
| hsa-miR-6779-3p  | 0.1     | 0.1     | 0.1     | 0.1     |
| hsa-miR-6779-5p  | 2.48685 | 2.45796 | 3.55488 | 1.65858 |
| hsa-miR-6780a-3p | 0.1     | 0.1     | 0.1     | 0.1     |
| hsa-miR-6780a-5p | 0.1     | 0.1     | 0.1     | 0.1     |
| hsa-miR-6780b-3p | 0.1     | 0.1     | 0.1     | 0.1     |
| hsa-miR-6780b-5p | 25.2396 | 25.9106 | 24.2791 | 25.9952 |
| hsa-miR-6781-3p  | 0.1     | 0.1     | 0.1     | 0.1     |
| hsa-miR-6781-5p  | 0.1     | 0.1     | 0.1     | 0.1     |
| hsa-miR-6782-3p  | 0.1     | 0.1     | 0.1     | 0.1     |
| hsa-miR-6782-5p  | 0.1     | 0.1     | 0.1     | 0.1     |
| hsa-miR-6783-3p  | 0.1     | 0.1     | 0.1     | 0.1     |
| hsa-miR-6783-5p  | 0.1     | 0.1     | 0.1     | 0.1     |
| hsa-miR-6784-3p  | 0.1     | 0.1     | 0.1     | 0.1     |
| hsa-miR-6784-5p  | 0.1     | 0.1     | 0.1     | 0.1     |
| hsa-miR-6785-3p  | 0.1     | 0.1     | 0.1     | 0.1     |
| hsa-miR-6785-5p  | 27.4724 | 32.4484 | 34.8682 | 28.4949 |
| hsa-miR-6786-3p  | 0.1     | 0.1     | 0.1     | 0.1     |
| hsa-miR-6786-5p  | 0.1     | 0.1     | 0.1     | 0.1     |
| hsa-miR-6787-3p  | 0.1     | 0.1     | 0.1     | 0.1     |
| hsa-miR-6787-5p  | 0.1     | 0.1     | 0.1     | 0.1     |
| hsa-miR-6788-3p  | 0.1     | 0.1     | 0.1     | 0.1     |
| hsa-miR-6788-5p  | 0.1     | 0.1     | 0.1     | 0.1     |
| hsa-miR-6789-3p  | 0.1     | 0.1     | 0.1     | 0.1     |
| hsa-miR-6789-5p  | 1.4953  | 0.1     | 0.1     | 0.1     |
| hsa-miR-6790-3p  | 0.1     | 0.1     | 0.1     | 0.1     |
| hsa-miR-6790-5p  | 0.1     | 0.1     | 0.1     | 0.1     |
| hsa-miR-6791-3p  | 0.1     | 0.1     | 0.1     | 0.1     |
| hsa-miR-6791-5p  | 8.33571 | 7.08774 | 9.54158 | 5.15713 |
| hsa-miR-6792-3p  | 0.1     | 0.1     | 0.1     | 0.1     |
| hsa-miR-6792-5p  | 0.1     | 0.1     | 0.1     | 0.1     |
| hsa-miR-6793-3p  | 0.1     | 0.1     | 0.1     | 0.1     |
| hsa-miR-6793-5p  | 0.1     | 0.1     | 0.1     | 0.1     |
| hsa-miR-6794-3p  | 0.1     | 0.1     | 0.1     | 0.1     |
| hsa-miR-6794-5p  | 0.1     | 0.1     | 0.1     | 0.1     |
| hsa-miR-6795-3p  | 0.1     | 0.1     | 0.1     | 0.1     |
| hsa-miR-6795-5p  | 0.1     | 0.1     | 0.1     | 0.1     |
| hsa-miR-6796-3p  | 0.1     | 0.1     | 0.1     | 0.1     |
| hsa-miR-6796-5p  | 0.1     | 0.1     | 0.1     | 0.1     |
| hsa-miR-6797-3p  | 1.59933 | 0.1     | 0.1     | 0.1     |
| hsa-miR-6797-5p  | 0.1     | 0.1     | 0.1     | 0.1     |
| hsa-miR-6798-3p  | 0.1     | 0.1     | 0.1     | 0.1     |
| hsa-miR-6798-5p  | 0.1     | 0.1     | 0.1     | 0.1     |
| hsa-miR-6799-3p  | 0.1     | 0.1     | 0.1     | 0.1     |
| hsa-miR-6799-5p  | 0.1     | 0.1     | 0.1     | 0.1     |
| hsa-miR-6800-3p  | 0.1     | 0.1     | 0.1     | 0.1     |
| hsa-miR-6800-5p  | 23.9736 | 29.0327 | 25.2528 | 23.5071 |
| hsa-miR-6801-3p  | 0.1     | 0.1     | 0.1     | 0.1     |
| hsa-miR-6801-5p  | 0.1     | 0.1     | 0.1     | 0.1     |
| hsa-miR-6802-3p  | 0.1     | 0.1     | 0.1     | 0.1     |
| hsa-miR-6802-5p  | 0.1     | 0.1     | 0.1     | 0.1     |
| hsa-miR-6803-3p  | 0.1     | 0.1     | 0.1     | 0.1     |

|                 |         |         |         |         |
|-----------------|---------|---------|---------|---------|
| hsa-miR-6803-5p | 30.1002 | 31.906  | 36.7972 | 27.1703 |
| hsa-miR-6804-3p | 0.1     | 0.1     | 0.1     | 0.1     |
| hsa-miR-6804-5p | 0.1     | 0.1     | 0.1     | 0.1     |
| hsa-miR-6805-5p | 0.1     | 0.1     | 0.1     | 0.1     |
| hsa-miR-6806-3p | 0.1     | 0.1     | 0.1     | 0.1     |
| hsa-miR-6806-5p | 0.1     | 0.1     | 0.1     | 0.1     |
| hsa-miR-6807-3p | 0.1     | 0.1     | 0.1     | 0.1     |
| hsa-miR-6807-5p | 0.1     | 0.1     | 0.1     | 0.1     |
| hsa-miR-6808-3p | 0.1     | 0.1     | 0.1     | 0.1     |
| hsa-miR-6808-5p | 0.1     | 0.1     | 0.1     | 0.1     |
| hsa-miR-6809-3p | 0.1     | 0.1     | 0.1     | 0.1     |
| hsa-miR-6809-5p | 0.1     | 0.1     | 0.1     | 0.1     |
| hsa-miR-6810-3p | 0.1     | 0.1     | 0.1     | 0.1     |
| hsa-miR-6810-5p | 0.1     | 0.1     | 0.1     | 0.1     |
| hsa-miR-6811-3p | 0.1     | 0.1     | 0.1     | 0.1     |
| hsa-miR-6811-5p | 0.1     | 0.1     | 0.1     | 0.1     |
| hsa-miR-6812-3p | 0.1     | 0.1     | 0.1     | 0.1     |
| hsa-miR-6812-5p | 2.05634 | 2.26791 | 0.1     | 0.1     |
| hsa-miR-6813-3p | 0.1     | 0.1     | 0.1     | 0.1     |
| hsa-miR-6813-5p | 0.1     | 0.1     | 0.1     | 0.1     |
| hsa-miR-6814-3p | 0.1     | 0.1     | 0.1     | 0.1     |
| hsa-miR-6814-5p | 0.1     | 0.1     | 0.1     | 0.1     |
| hsa-miR-6815-3p | 0.1     | 0.1     | 0.1     | 0.1     |
| hsa-miR-6815-5p | 0.1     | 0.1     | 0.1     | 0.1     |
| hsa-miR-6816-3p | 0.1     | 0.1     | 0.1     | 0.1     |
| hsa-miR-6816-5p | 0.1     | 0.1     | 0.1     | 0.1     |
| hsa-miR-6817-3p | 0.1     | 0.1     | 0.1     | 0.1     |
| hsa-miR-6817-5p | 0.1     | 0.1     | 0.1     | 0.1     |
| hsa-miR-6818-3p | 0.1     | 0.1     | 0.1     | 0.1     |
| hsa-miR-6818-5p | 0.1     | 0.1     | 0.1     | 0.1     |
| hsa-miR-6819-3p | 0.1     | 0.1     | 0.1     | 0.1     |
| hsa-miR-6819-5p | 0.1     | 0.1     | 0.1     | 0.1     |
| hsa-miR-6820-3p | 0.1     | 0.1     | 0.1     | 0.1     |
| hsa-miR-6820-5p | 0.1     | 0.1     | 0.1     | 0.1     |
| hsa-miR-6821-3p | 0.1     | 0.1     | 0.1     | 0.1     |
| hsa-miR-6821-5p | 40.9028 | 38.6151 | 47.9495 | 26.1826 |
| hsa-miR-6822-3p | 0.1     | 0.1     | 0.1     | 0.1     |
| hsa-miR-6822-5p | 0.1     | 0.1     | 0.1     | 0.1     |
| hsa-miR-6823-3p | 0.1     | 0.1     | 0.1     | 0.1     |
| hsa-miR-6823-5p | 0.1     | 0.1     | 0.1     | 0.1     |
| hsa-miR-6824-3p | 0.1     | 0.1     | 0.1     | 0.1     |
| hsa-miR-6824-5p | 0.1     | 0.1     | 0.1     | 0.1     |
| hsa-miR-6825-3p | 0.1     | 0.1     | 0.1     | 0.1     |
| hsa-miR-6825-5p | 0.1     | 0.1     | 0.1     | 0.1     |
| hsa-miR-6826-3p | 0.1     | 0.1     | 0.1     | 0.1     |
| hsa-miR-6826-5p | 12.9352 | 36.6505 | 28.3383 | 59.1977 |
| hsa-miR-6827-3p | 0.1     | 0.1     | 0.1     | 0.1     |
| hsa-miR-6827-5p | 0.1     | 0.1     | 0.1     | 0.1     |
| hsa-miR-6828-3p | 0.1     | 0.1     | 0.1     | 0.1     |
| hsa-miR-6828-5p | 0.1     | 0.1     | 0.1     | 0.1     |
| hsa-miR-6829-3p | 0.1     | 0.1     | 0.1     | 0.1     |
| hsa-miR-6829-5p | 8.52557 | 13.6514 | 35.3926 | 9.48756 |
| hsa-miR-6830-3p | 0.1     | 0.1     | 0.1     | 0.1     |

|                 |         |         |         |         |
|-----------------|---------|---------|---------|---------|
| hsa-miR-6830-5p | 0.1     | 0.1     | 0.1     | 0.1     |
| hsa-miR-6831-3p | 0.1     | 0.1     | 0.1     | 0.1     |
| hsa-miR-6831-5p | 0.1     | 0.1     | 0.1     | 0.1     |
| hsa-miR-6832-3p | 0.1     | 0.1     | 0.1     | 0.1     |
| hsa-miR-6832-5p | 0.1     | 0.1     | 0.1     | 0.1     |
| hsa-miR-6833-3p | 0.1     | 0.1     | 0.1     | 0.1     |
| hsa-miR-6833-5p | 0.1     | 0.1     | 0.1     | 0.1     |
| hsa-miR-6834-3p | 0.1     | 0.1     | 0.1     | 0.1     |
| hsa-miR-6834-5p | 0.1     | 0.1     | 0.1     | 0.1     |
| hsa-miR-6835-3p | 0.1     | 0.1     | 0.1     | 0.1     |
| hsa-miR-6835-5p | 0.1     | 0.1     | 0.1     | 0.1     |
| hsa-miR-6836-3p | 0.1     | 0.1     | 0.1     | 0.1     |
| hsa-miR-6836-5p | 0.1     | 0.1     | 0.1     | 0.1     |
| hsa-miR-6837-3p | 0.1     | 0.1     | 0.1     | 0.1     |
| hsa-miR-6837-5p | 0.1     | 0.1     | 0.1     | 0.1     |
| hsa-miR-6838-3p | 0.1     | 0.1     | 0.1     | 0.1     |
| hsa-miR-6838-5p | 0.1     | 0.1     | 0.1     | 0.1     |
| hsa-miR-6839-3p | 0.1     | 0.1     | 0.1     | 0.1     |
| hsa-miR-6839-5p | 0.1     | 0.1     | 0.1     | 0.1     |
| hsa-miR-6840-3p | 0.1     | 0.1     | 0.1     | 0.1     |
| hsa-miR-6840-5p | 0.1     | 0.1     | 0.1     | 0.1     |
| hsa-miR-6841-3p | 0.1     | 0.1     | 0.1     | 0.1     |
| hsa-miR-6841-5p | 0.1     | 0.1     | 0.1     | 0.1     |
| hsa-miR-6842-3p | 0.1     | 0.1     | 0.1     | 0.1     |
| hsa-miR-6842-5p | 0.1     | 0.1     | 0.1     | 0.1     |
| hsa-miR-6843-3p | 0.1     | 0.1     | 0.1     | 0.1     |
| hsa-miR-6844    | 0.1     | 0.1     | 0.1     | 0.1     |
| hsa-miR-6845-3p | 0.1     | 0.1     | 0.1     | 0.1     |
| hsa-miR-6845-5p | 0.1     | 0.1     | 0.1     | 0.1     |
| hsa-miR-6846-3p | 0.1     | 0.1     | 0.1     | 0.1     |
| hsa-miR-6846-5p | 0.1     | 0.1     | 0.1     | 0.1     |
| hsa-miR-6847-3p | 0.1     | 0.1     | 0.1     | 0.1     |
| hsa-miR-6847-5p | 0.1     | 0.1     | 0.1     | 0.1     |
| hsa-miR-6848-3p | 0.1     | 0.1     | 0.1     | 0.1     |
| hsa-miR-6848-5p | 0.1     | 0.1     | 0.1     | 0.1     |
| hsa-miR-6849-3p | 0.1     | 0.1     | 0.1     | 0.1     |
| hsa-miR-6849-5p | 0.1     | 0.1     | 0.1     | 0.1     |
| hsa-miR-6850-3p | 0.1     | 0.1     | 0.1     | 0.1     |
| hsa-miR-6850-5p | 5.78274 | 4.54414 | 5.57743 | 1.62713 |
| hsa-miR-6851-3p | 0.1     | 0.1     | 0.1     | 0.1     |
| hsa-miR-6851-5p | 0.1     | 0.1     | 0.1     | 0.1     |
| hsa-miR-6852-3p | 0.1     | 0.1     | 0.1     | 0.1     |
| hsa-miR-6852-5p | 0.1     | 0.1     | 0.1     | 0.1     |
| hsa-miR-6853-3p | 0.1     | 0.1     | 0.1     | 0.1     |
| hsa-miR-6853-5p | 0.1     | 0.1     | 0.1     | 0.1     |
| hsa-miR-6854-3p | 0.1     | 0.1     | 0.1     | 0.1     |
| hsa-miR-6854-5p | 0.1     | 0.1     | 0.1     | 0.1     |
| hsa-miR-6855-3p | 0.1     | 0.1     | 0.1     | 0.1     |
| hsa-miR-6855-5p | 0.1     | 0.1     | 0.1     | 0.1     |
| hsa-miR-6856-3p | 0.1     | 0.1     | 0.1     | 0.1     |
| hsa-miR-6856-5p | 0.1     | 0.1     | 0.1     | 0.1     |
| hsa-miR-6857-3p | 0.1     | 0.1     | 0.1     | 0.1     |
| hsa-miR-6857-5p | 0.1     | 0.1     | 0.1     | 0.1     |

|                 |         |         |         |         |
|-----------------|---------|---------|---------|---------|
| hsa-miR-6858-3p | 0.1     | 0.1     | 0.1     | 0.1     |
| hsa-miR-6858-5p | 0.1     | 0.1     | 0.1     | 0.1     |
| hsa-miR-6859-3p | 0.1     | 0.1     | 0.1     | 0.1     |
| hsa-miR-6859-5p | 0.1     | 0.1     | 0.1     | 0.1     |
| hsa-miR-6860    | 0.1     | 0.1     | 0.1     | 0.1     |
| hsa-miR-6861-3p | 0.1     | 0.1     | 0.1     | 0.1     |
| hsa-miR-6861-5p | 0.1     | 0.1     | 0.1     | 0.1     |
| hsa-miR-6862-3p | 0.1     | 0.1     | 0.1     | 0.1     |
| hsa-miR-6862-5p | 0.1     | 0.1     | 0.1     | 0.1     |
| hsa-miR-6863    | 0.1     | 0.1     | 0.1     | 0.1     |
| hsa-miR-6864-3p | 0.1     | 0.1     | 0.1     | 0.1     |
| hsa-miR-6864-5p | 0.1     | 0.1     | 0.1     | 0.1     |
| hsa-miR-6865-3p | 0.1     | 0.1     | 0.1     | 0.1     |
| hsa-miR-6865-5p | 0.1     | 0.1     | 0.1     | 0.1     |
| hsa-miR-6866-3p | 0.1     | 0.1     | 0.1     | 0.1     |
| hsa-miR-6866-5p | 0.1     | 0.1     | 0.1     | 0.1     |
| hsa-miR-6867-3p | 0.1     | 0.1     | 0.1     | 0.1     |
| hsa-miR-6867-5p | 0.1     | 0.1     | 0.1     | 0.1     |
| hsa-miR-6868-3p | 0.1     | 0.1     | 0.1     | 0.1     |
| hsa-miR-6868-5p | 0.1     | 0.1     | 0.1     | 0.1     |
| hsa-miR-6869-3p | 0.1     | 0.1     | 0.1     | 0.1     |
| hsa-miR-6869-5p | 72.9881 | 74.5533 | 89.2659 | 58.0817 |
| hsa-miR-6870-3p | 0.1     | 0.1     | 0.1     | 0.1     |
| hsa-miR-6870-5p | 0.1     | 0.1     | 0.1     | 0.1     |
| hsa-miR-6871-3p | 0.1     | 0.1     | 0.1     | 0.1     |
| hsa-miR-6871-5p | 0.1     | 0.1     | 0.1     | 0.1     |
| hsa-miR-6872-3p | 0.1     | 0.1     | 0.1     | 0.1     |
| hsa-miR-6872-5p | 0.1     | 0.1     | 0.1     | 0.1     |
| hsa-miR-6873-3p | 0.1     | 0.1     | 0.1     | 0.1     |
| hsa-miR-6873-5p | 0.1     | 0.1     | 0.1     | 0.1     |
| hsa-miR-6874-3p | 0.1     | 0.1     | 0.1     | 0.1     |
| hsa-miR-6874-5p | 0.1     | 0.1     | 0.1     | 0.1     |
| hsa-miR-6875-3p | 0.1     | 0.1     | 0.1     | 0.1     |
| hsa-miR-6875-5p | 126.202 | 129.842 | 117.249 | 145.3   |
| hsa-miR-6876-3p | 0.1     | 0.1     | 0.1     | 0.1     |
| hsa-miR-6876-5p | 0.1     | 0.1     | 0.1     | 0.1     |
| hsa-miR-6877-3p | 0.1     | 0.1     | 0.1     | 0.1     |
| hsa-miR-6877-5p | 0.1     | 0.1     | 0.1     | 0.1     |
| hsa-miR-6878-3p | 0.1     | 0.1     | 0.1     | 0.1     |
| hsa-miR-6878-5p | 0.1     | 0.1     | 0.1     | 0.1     |
| hsa-miR-6879-3p | 0.1     | 0.1     | 0.1     | 0.1     |
| hsa-miR-6879-5p | 26.9375 | 27.3443 | 42.6799 | 27.2687 |
| hsa-miR-6880-3p | 0.1     | 0.1     | 0.1     | 0.1     |
| hsa-miR-6880-5p | 0.1     | 0.1     | 12.2604 | 0.1     |
| hsa-miR-6881-3p | 0.1     | 0.1     | 0.1     | 0.1     |
| hsa-miR-6881-5p | 0.1     | 0.1     | 0.1     | 0.1     |
| hsa-miR-6882-3p | 0.1     | 0.1     | 0.1     | 0.1     |
| hsa-miR-6882-5p | 0.1     | 0.1     | 0.1     | 0.1     |
| hsa-miR-6883-3p | 0.1     | 0.1     | 0.1     | 0.1     |
| hsa-miR-6883-5p | 0.1     | 0.1     | 0.1     | 0.1     |
| hsa-miR-6884-3p | 0.1     | 0.1     | 0.1     | 0.1     |
| hsa-miR-6884-5p | 0.1     | 0.1     | 0.1     | 0.1     |
| hsa-miR-6885-3p | 0.1     | 0.1     | 0.1     | 0.1     |

|                 |         |         |         |         |
|-----------------|---------|---------|---------|---------|
| hsa-miR-6885-5p | 0.1     | 0.1     | 0.1     | 0.1     |
| hsa-miR-6886-3p | 0.1     | 0.1     | 0.1     | 0.1     |
| hsa-miR-6886-5p | 0.1     | 0.1     | 0.1     | 0.1     |
| hsa-miR-6887-3p | 0.1     | 0.1     | 0.1     | 0.1     |
| hsa-miR-6887-5p | 0.1     | 0.1     | 0.1     | 0.1     |
| hsa-miR-6888-3p | 0.1     | 0.1     | 0.1     | 0.1     |
| hsa-miR-6888-5p | 0.1     | 0.1     | 0.1     | 0.1     |
| hsa-miR-6889-3p | 0.1     | 0.1     | 0.1     | 0.1     |
| hsa-miR-6889-5p | 0.1     | 0.1     | 0.1     | 0.1     |
| hsa-miR-6890-3p | 0.1     | 0.1     | 0.1     | 0.1     |
| hsa-miR-6890-5p | 0.1     | 0.1     | 0.1     | 0.1     |
| hsa-miR-6891-3p | 0.1     | 0.1     | 0.1     | 0.1     |
| hsa-miR-6891-5p | 10.1252 | 10.2401 | 12.3319 | 6.25901 |
| hsa-miR-6892-3p | 0.1     | 0.1     | 0.1     | 0.1     |
| hsa-miR-6892-5p | 0.1     | 0.1     | 0.1     | 0.1     |
| hsa-miR-6893-3p | 0.1     | 0.1     | 0.1     | 0.1     |
| hsa-miR-6893-5p | 10.6207 | 11.8448 | 11.2891 | 8.93935 |
| hsa-miR-6894-3p | 0.1     | 0.1     | 0.1     | 0.1     |
| hsa-miR-6894-5p | 0.1     | 0.1     | 0.1     | 0.1     |
| hsa-miR-6895-3p | 0.1     | 0.1     | 0.1     | 0.1     |
| hsa-miR-6895-5p | 0.1     | 0.1     | 0.1     | 0.1     |
| hsa-miR-708-3p  | 0.1     | 0.1     | 0.1     | 0.1     |
| hsa-miR-708-5p  | 0.1     | 0.1     | 0.1     | 0.1     |
| hsa-miR-7106-3p | 0.1     | 0.1     | 0.1     | 0.1     |
| hsa-miR-7106-5p | 0.1     | 0.1     | 0.1     | 0.1     |
| hsa-miR-7107-3p | 0.1     | 0.1     | 0.1     | 0.1     |
| hsa-miR-7107-5p | 11.0767 | 11.6197 | 17.8405 | 7.33056 |
| hsa-miR-7108-3p | 0.1     | 0.1     | 0.1     | 0.1     |
| hsa-miR-7108-5p | 0.1     | 0.1     | 2.78621 | 0.1     |
| hsa-miR-7109-3p | 0.1     | 0.1     | 0.1     | 0.1     |
| hsa-miR-7109-5p | 0.1     | 0.1     | 0.1     | 0.1     |
| hsa-miR-711     | 0.1     | 0.1     | 0.1     | 0.1     |
| hsa-miR-7110-3p | 0.1     | 0.1     | 0.1     | 0.1     |
| hsa-miR-7110-5p | 13.3541 | 14.7216 | 14.5021 | 9.2837  |
| hsa-miR-7111-3p | 0.1     | 0.1     | 0.1     | 0.1     |
| hsa-miR-7111-5p | 0.1     | 0.1     | 0.1     | 0.1     |
| hsa-miR-7112-3p | 0.1     | 0.1     | 0.1     | 0.1     |
| hsa-miR-7112-5p | 0.1     | 0.1     | 0.1     | 0.1     |
| hsa-miR-7113-3p | 0.1     | 0.1     | 0.1     | 0.1     |
| hsa-miR-7113-5p | 0.1     | 0.1     | 0.1     | 0.1     |
| hsa-miR-7114-3p | 0.1     | 0.1     | 0.1     | 0.1     |
| hsa-miR-7114-5p | 0.1     | 2.01157 | 0.1     | 5.87788 |
| hsa-miR-7-1-3p  | 0.1     | 0.1     | 0.1     | 0.1     |
| hsa-miR-7150    | 8.56559 | 14.8266 | 16.8793 | 9.63764 |
| hsa-miR-7151-3p | 0.1     | 0.1     | 0.1     | 0.1     |
| hsa-miR-7151-5p | 0.1     | 0.1     | 0.1     | 0.1     |
| hsa-miR-7152-3p | 4.57345 | 2.04044 | 12.6767 | 0.1     |
| hsa-miR-7152-5p | 0.1     | 0.1     | 0.1     | 0.1     |
| hsa-miR-7153-3p | 0.1     | 0.1     | 0.1     | 0.1     |
| hsa-miR-7153-5p | 0.1     | 0.1     | 0.1     | 0.1     |
| hsa-miR-7154-3p | 0.1     | 0.1     | 0.1     | 0.1     |
| hsa-miR-7154-5p | 0.1     | 0.1     | 0.1     | 0.1     |
| hsa-miR-7155-3p | 0.1     | 0.1     | 0.1     | 0.1     |

|                 |         |         |         |         |
|-----------------|---------|---------|---------|---------|
| hsa-miR-7155-5p | 0.1     | 0.1     | 0.1     | 0.1     |
| hsa-miR-7156-3p | 0.1     | 0.1     | 0.1     | 0.1     |
| hsa-miR-7156-5p | 0.1     | 0.1     | 0.1     | 0.1     |
| hsa-miR-7157-3p | 0.1     | 0.1     | 0.1     | 0.1     |
| hsa-miR-7157-5p | 0.1     | 0.1     | 0.1     | 0.1     |
| hsa-miR-7158-3p | 0.1     | 0.1     | 0.1     | 0.1     |
| hsa-miR-7158-5p | 0.1     | 0.1     | 0.1     | 0.1     |
| hsa-miR-7159-3p | 0.1     | 0.1     | 0.1     | 0.1     |
| hsa-miR-7159-5p | 0.1     | 0.1     | 11.0541 | 0.1     |
| hsa-miR-7160-3p | 0.1     | 0.1     | 0.1     | 0.1     |
| hsa-miR-7160-5p | 0.1     | 0.1     | 0.1     | 0.1     |
| hsa-miR-7161-3p | 0.1     | 0.1     | 0.1     | 0.1     |
| hsa-miR-7161-5p | 0.1     | 0.1     | 0.1     | 0.1     |
| hsa-miR-7162-3p | 0.1     | 0.1     | 0.1     | 0.1     |
| hsa-miR-7162-5p | 0.1     | 0.1     | 0.1     | 0.1     |
| hsa-miR-718     | 0.1     | 0.1     | 0.1     | 0.1     |
| hsa-miR-7-2-3p  | 0.1     | 0.1     | 0.1     | 0.1     |
| hsa-miR-744-3p  | 0.1     | 0.1     | 0.1     | 0.1     |
| hsa-miR-744-5p  | 0.1     | 0.1     | 0.1     | 0.1     |
| hsa-miR-7515    | 0.1     | 0.1     | 0.1     | 0.1     |
| hsa-miR-758-3p  | 0.1     | 0.1     | 0.1     | 0.1     |
| hsa-miR-758-5p  | 0.1     | 0.1     | 0.1     | 0.1     |
| hsa-miR-759     | 0.1     | 0.1     | 0.1     | 0.1     |
| hsa-miR-7-5p    | 3.96515 | 4.08054 | 3.21278 | 2.94017 |
| hsa-miR-760     | 0.1     | 0.1     | 0.1     | 0.1     |
| hsa-miR-761     | 0.1     | 0.1     | 0.1     | 0.1     |
| hsa-miR-762     | 7.88971 | 8.59948 | 5.33484 | 4.5946  |
| hsa-miR-764     | 0.1     | 0.1     | 0.1     | 0.1     |
| hsa-miR-7641    | 289.16  | 356.901 | 287.453 | 351.372 |
| hsa-miR-765     | 0.1     | 0.1     | 0.1     | 0.1     |
| hsa-miR-766-3p  | 0.1     | 0.1     | 0.1     | 0.1     |
| hsa-miR-766-5p  | 0.1     | 0.1     | 0.1     | 0.1     |
| hsa-miR-767-3p  | 0.1     | 0.1     | 0.1     | 0.1     |
| hsa-miR-767-5p  | 0.1     | 0.1     | 0.1     | 0.1     |
| hsa-miR-769-3p  | 0.1     | 0.1     | 0.1     | 0.1     |
| hsa-miR-769-5p  | 1.97061 | 1.83066 | 0.1     | 2.73252 |
| hsa-miR-7702    | 0.1     | 0.1     | 0.1     | 0.1     |
| hsa-miR-7703    | 0.1     | 0.1     | 0.1     | 0.1     |
| hsa-miR-7704    | 42.5147 | 43.4375 | 57.063  | 37.3586 |
| hsa-miR-7705    | 0.1     | 0.1     | 0.1     | 0.1     |
| hsa-miR-770-5p  | 0.1     | 0.1     | 0.1     | 0.1     |
| hsa-miR-7706    | 0.1     | 0.1     | 0.1     | 0.1     |
| hsa-miR-7843-3p | 0.1     | 0.1     | 0.1     | 0.1     |
| hsa-miR-7843-5p | 0.1     | 0.1     | 0.1     | 0.1     |
| hsa-miR-7844-5p | 0.1     | 0.1     | 0.1     | 0.1     |
| hsa-miR-7845-5p | 0.1     | 0.1     | 4.67859 | 0.1     |
| hsa-miR-7846-3p | 0.1     | 0.1     | 0.1     | 0.1     |
| hsa-miR-7847-3p | 7.36335 | 6.19066 | 11.1847 | 2.83108 |
| hsa-miR-7848-3p | 0.1     | 0.1     | 0.1     | 0.1     |
| hsa-miR-7849-3p | 0.1     | 0.1     | 0.1     | 0.1     |
| hsa-miR-7850-5p | 0.1     | 0.1     | 0.1     | 0.1     |
| hsa-miR-7851-3p | 0.1     | 0.1     | 0.1     | 0.1     |
| hsa-miR-7852-3p | 0.1     | 0.1     | 0.1     | 0.1     |



|                 |         |         |         |         |
|-----------------|---------|---------|---------|---------|
| hsa-miR-7853-5p | 0.1     | 0.1     | 0.1     | 0.1     |
| hsa-miR-7854-3p | 0.1     | 0.1     | 0.1     | 0.1     |
| hsa-miR-7855-5p | 0.1     | 0.1     | 0.1     | 0.1     |
| hsa-miR-7856-5p | 0.1     | 0.1     | 0.1     | 0.1     |
| hsa-miR-7973    | 0.1     | 0.1     | 0.1     | 0.1     |
| hsa-miR-7974    | 0.1     | 0.1     | 0.1     | 0.1     |
| hsa-miR-7975    | 9607.13 | 19786.8 | 12560.9 | 25987   |
| hsa-miR-7976    | 0.1     | 0.1     | 0.1     | 0.1     |
| hsa-miR-7977    | 3808.74 | 10009.6 | 3789.2  | 13856.5 |
| hsa-miR-7978    | 0.1     | 0.1     | 0.1     | 0.1     |
| hsa-miR-802     | 0.1     | 0.1     | 0.1     | 0.1     |
| hsa-miR-8052    | 0.1     | 0.1     | 0.1     | 0.1     |
| hsa-miR-8053    | 0.1     | 0.1     | 0.1     | 0.1     |
| hsa-miR-8054    | 0.1     | 0.1     | 0.1     | 0.1     |
| hsa-miR-8055    | 0.1     | 0.1     | 0.1     | 0.1     |
| hsa-miR-8056    | 0.1     | 0.1     | 0.1     | 0.1     |
| hsa-miR-8057    | 0.1     | 0.1     | 0.1     | 0.1     |
| hsa-miR-8058    | 0.1     | 0.1     | 0.1     | 0.1     |
| hsa-miR-8059    | 0.1     | 0.1     | 0.1     | 0.1     |
| hsa-miR-8060    | 0.1     | 0.1     | 0.1     | 0.1     |
| hsa-miR-8061    | 0.1     | 0.1     | 0.1     | 0.1     |
| hsa-miR-8062    | 0.1     | 0.1     | 0.1     | 0.1     |
| hsa-miR-8063    | 8.11988 | 4.50258 | 5.65139 | 2.86285 |
| hsa-miR-8064    | 0.1     | 0.1     | 0.1     | 0.1     |
| hsa-miR-8065    | 0.1     | 0.1     | 0.1     | 0.1     |
| hsa-miR-8066    | 0.1     | 0.1     | 0.1     | 0.1     |
| hsa-miR-8067    | 0.1     | 0.1     | 0.1     | 0.1     |
| hsa-miR-8068    | 0.1     | 0.1     | 0.1     | 0.1     |
| hsa-miR-8069    | 574.025 | 659.984 | 1399.36 | 674.629 |
| hsa-miR-8070    | 0.1     | 0.1     | 0.1     | 0.1     |
| hsa-miR-8071    | 0.1     | 0.1     | 0.1     | 0.1     |
| hsa-miR-8072    | 5.24625 | 5.71904 | 7.52741 | 4.80795 |
| hsa-miR-8073    | 0.1     | 0.1     | 0.1     | 0.1     |
| hsa-miR-8074    | 0.1     | 0.1     | 0.1     | 0.1     |
| hsa-miR-8075    | 0.1     | 0.1     | 0.1     | 0.1     |
| hsa-miR-8076    | 0.1     | 0.1     | 0.1     | 0.1     |
| hsa-miR-8077    | 0.1     | 0.1     | 0.1     | 0.1     |
| hsa-miR-8078    | 0.1     | 0.1     | 0.1     | 0.1     |
| hsa-miR-8079    | 0.1     | 0.1     | 0.1     | 0.1     |
| hsa-miR-8080    | 0.1     | 0.1     | 0.1     | 0.1     |
| hsa-miR-8081    | 0.1     | 0.1     | 0.1     | 0.1     |
| hsa-miR-8082    | 0.1     | 0.1     | 0.1     | 0.1     |
| hsa-miR-8083    | 0.1     | 0.1     | 0.1     | 0.1     |
| hsa-miR-8084    | 0.1     | 0.1     | 0.1     | 0.1     |
| hsa-miR-8085    | 0.1     | 0.1     | 0.1     | 0.1     |
| hsa-miR-8086    | 0.1     | 0.1     | 0.1     | 0.1     |
| hsa-miR-8087    | 0.1     | 0.1     | 0.1     | 0.1     |
| hsa-miR-8088    | 0.1     | 0.1     | 0.1     | 0.1     |
| hsa-miR-8089    | 17.1932 | 30.9121 | 115.28  | 24.0372 |
| hsa-miR-8485    | 1.69204 | 2.13897 | 17.66   | 1.69644 |
| hsa-miR-873-3p  | 0.1     | 0.1     | 0.1     | 0.1     |
| hsa-miR-873-5p  | 0.1     | 0.1     | 0.1     | 0.1     |
| hsa-miR-874-3p  | 1.57864 | 0.1     | 2.93486 | 0.1     |

|                  |         |         |         |         |
|------------------|---------|---------|---------|---------|
| hsa-miR-874-5p   | 0.1     | 0.1     | 0.1     | 0.1     |
| hsa-miR-875-3p   | 0.1     | 0.1     | 0.1     | 0.1     |
| hsa-miR-875-5p   | 0.1     | 0.1     | 0.1     | 0.1     |
| hsa-miR-876-3p   | 0.1     | 0.1     | 0.1     | 0.1     |
| hsa-miR-876-5p   | 0.1     | 0.1     | 0.1     | 0.1     |
| hsa-miR-877-5p   | 0.1     | 0.1     | 0.1     | 0.1     |
| hsa-miR-885-3p   | 0.1     | 0.1     | 0.1     | 0.1     |
| hsa-miR-885-5p   | 0.1     | 0.1     | 0.1     | 0.1     |
| hsa-miR-887-3p   | 0.1     | 0.1     | 0.1     | 0.1     |
| hsa-miR-887-5p   | 0.1     | 0.1     | 0.1     | 0.1     |
| hsa-miR-888-3p   | 0.1     | 0.1     | 0.1     | 0.1     |
| hsa-miR-888-5p   | 0.1     | 0.1     | 0.1     | 0.1     |
| hsa-miR-889-3p   | 0.1     | 0.1     | 0.1     | 0.1     |
| hsa-miR-889-5p   | 0.1     | 0.1     | 0.1     | 0.1     |
| hsa-miR-890      | 0.1     | 0.1     | 0.1     | 0.1     |
| hsa-miR-891a-3p  | 0.1     | 0.1     | 0.1     | 0.1     |
| hsa-miR-891a-5p  | 0.1     | 0.1     | 0.1     | 0.1     |
| hsa-miR-891b     | 0.1     | 0.1     | 0.1     | 0.1     |
| hsa-miR-892a     | 0.1     | 0.1     | 0.1     | 0.1     |
| hsa-miR-892b     | 0.1     | 0.1     | 0.1     | 0.1     |
| hsa-miR-892c-3p  | 0.1     | 0.1     | 0.1     | 0.1     |
| hsa-miR-892c-5p  | 0.1     | 0.1     | 0.1     | 0.1     |
| hsa-miR-920      | 0.1     | 0.1     | 0.1     | 0.1     |
| hsa-miR-921      | 0.1     | 0.1     | 0.1     | 0.1     |
| hsa-miR-922      | 0.1     | 0.1     | 0.1     | 0.1     |
| hsa-miR-924      | 0.1     | 0.1     | 0.1     | 0.1     |
| hsa-miR-92a-1-5p | 0.1     | 0.1     | 0.1     | 0.1     |
| hsa-miR-92a-2-5p | 0.1     | 0.1     | 0.1     | 0.1     |
| hsa-miR-92a-3p   | 52.2052 | 53.2595 | 52.7759 | 40.0829 |
| hsa-miR-92b-3p   | 0.1     | 0.1     | 0.1     | 0.1     |
| hsa-miR-92b-5p   | 0.1     | 0.1     | 0.1     | 0.1     |
| hsa-miR-933      | 0.1     | 0.1     | 0.1     | 0.1     |
| hsa-miR-93-3p    | 0.1     | 0.1     | 0.1     | 0.1     |
| hsa-miR-934      | 0.1     | 0.1     | 0.1     | 0.1     |
| hsa-miR-935      | 0.1     | 0.1     | 0.1     | 0.1     |
| hsa-miR-93-5p    | 70.6096 | 67.8591 | 39.1236 | 88.3826 |
| hsa-miR-936      | 0.1     | 0.1     | 0.1     | 0.1     |
| hsa-miR-937-3p   | 0.1     | 0.1     | 0.1     | 0.1     |
| hsa-miR-937-5p   | 5.19723 | 4.37555 | 0.1     | 0.1     |
| hsa-miR-938      | 0.1     | 0.1     | 0.1     | 0.1     |
| hsa-miR-939-3p   | 0.1     | 0.1     | 0.1     | 0.1     |
| hsa-miR-939-5p   | 3.05812 | 5.04215 | 4.29756 | 4.92583 |
| hsa-miR-9-3p     | 0.1     | 0.1     | 0.1     | 0.1     |
| hsa-miR-940      | 1.82418 | 1.95268 | 1.99909 | 0.1     |
| hsa-miR-941      | 0.1     | 0.1     | 0.1     | 0.1     |
| hsa-miR-942-3p   | 0.1     | 0.1     | 0.1     | 0.1     |
| hsa-miR-942-5p   | 0.1     | 0.1     | 0.1     | 0.1     |
| hsa-miR-943      | 0.1     | 0.1     | 0.1     | 0.1     |
| hsa-miR-944      | 0.1     | 0.1     | 0.1     | 0.1     |
| hsa-miR-9500     | 0.1     | 0.1     | 0.1     | 0.1     |
| hsa-miR-95-3p    | 0.1     | 0.1     | 0.1     | 0.1     |
| hsa-miR-95-5p    | 0.1     | 0.1     | 0.1     | 0.1     |
| hsa-miR-9-5p     | 0.1     | 0.1     | 0.1     | 0.1     |

|                |         |         |         |         |
|----------------|---------|---------|---------|---------|
| hsa-miR-96-3p  | 0.1     | 0.1     | 0.1     | 0.1     |
| hsa-miR-96-5p  | 34.4941 | 47.4132 | 23.0938 | 59.1563 |
| hsa-miR-98-3p  | 0.1     | 0.1     | 0.1     | 0.1     |
| hsa-miR-98-5p  | 15.3502 | 13.961  | 14.0772 | 17.2799 |
| hsa-miR-99a-3p | 0.1     | 0.1     | 0.1     | 0.1     |
| hsa-miR-99a-5p | 24.0761 | 29.4514 | 19.6286 | 35.638  |
| hsa-miR-99b-3p | 0.1     | 0.1     | 0.1     | 0.1     |
| hsa-miR-99b-5p | 32.8368 | 40.2669 | 27.009  | 59.5509 |
